# Supplementary material for: Copper-catalyzed asymmetric alkynylation of cyclic N-sulfonyl ketimines
Source: Royal Society of Chemistry journal article supplement (doi:10.1039/c7cc02159c), 2017-01-01

## Supporting Information

# Copper-Catalyzed Asymmetric Alkynylation of Cyclic *N*-sulfonyl Ketimines

Zheng Ling,<sup>a</sup> Sonia Singh,<sup>a,b</sup> Fang Xie,<sup>\*a</sup> Liang Wu<sup>a</sup> and Wanbin Zhang<sup>\*a</sup>

<sup>a</sup> School of Chemistry and Chemical Engineering, Shanghai Jiao Tong University, 800 Dongchuan Road, Shanghai 200240, P. R. China

Fax: (+)86-21-54743265; Phone: (+)86-21-54743265; E-mail: wanbin@sjtu.edu.cn

<sup>b</sup> On leave from Yazd Branch, Islamic Azad University.

### Contents

|                                                                                                                                   |     |
|-----------------------------------------------------------------------------------------------------------------------------------|-----|
| 1. General Information .....                                                                                                      | S2  |
| 2. General procedure for the synthesis of cyclic <i>N</i> -sulfonyl $\alpha$ -iminoesters <b>1</b> and characterization data..... | S2  |
| 3. General procedure for the synthesis of <b>L15</b> and characterization data.....                                               | S3  |
| 4. Optimization reaction conditions.....                                                                                          | S4  |
| 5. General procedure for Cu-catalyzed alkynylation of cyclic ketimines <b>1</b> .....                                             | S5  |
| 6. General procedure for Cu-catalyzed alkynylation of cyclic ketimines <b>4</b> .....                                             | S5  |
| 7. Characterization data and HPLC of addition products .....                                                                      | S5  |
| 8. General Procedure for the derivatives of <b>3aa</b> and <b>5a</b> .....                                                        | S41 |
| 9. References.....                                                                                                                | S45 |
| 10. Copies of <sup>1</sup> H NMR and <sup>13</sup> C NMR spectra.....                                                             | S45 |

## 1. General Information

$^1\text{H}$  NMR (400 MHz) and  $^{13}\text{C}$  NMR (100 MHz) spectra were recorded on a Varian MERCURY plus-400 spectrometer with TMS as an internal standard. High resolution mass spectrum (HRMS) was performed at the Analysis Center of Shanghai Jiao Tong University. Enantioselectivity was measured by high performance liquid chromatography (HPLC) using Daicel Chiralcel AY, OD-H and AD-H columns with *n*-hexane/*i*-PrOH as an eluent. Column chromatography was performed using 100–200 mesh silica gel. Melting point was measured with SGW X-4 micro melting point apparatus. All commercially available substrates were used as received.

## 2. General procedure for the synthesis of cyclic *N*-sulfonyl $\alpha$ -iminoesters **1** and characterization data <sup>[1]</sup>

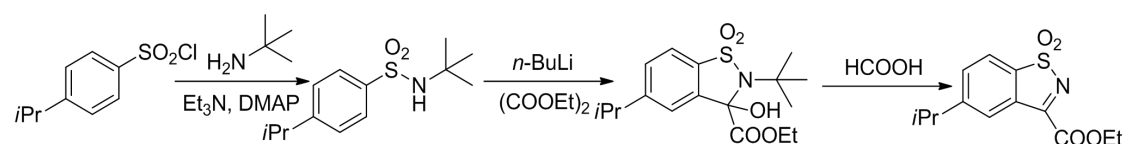

To a solution of *tert*-butylamine (15.0 mmol), triethylamine (20.0 mmol) and DMAP (1.0 mmol) in DCM in an ice bath was added 4-isopropylbenzene-1-sulfonyl chloride (10.0 mmol) dropwise. The mixture was stirred at room temperature overnight. It was washed with saturated sodium carbonate and brine. The organic layer was separated, and the aqueous layer was extracted with DCM. The combined organic extracts were dried over anhydrous  $\text{Na}_2\text{SO}_4$ . The solvent was evaporated in vacuo to give the crude product. Then the product was recrystallized to give the *N*-(*tert*-butyl)-4-isopropylbenzenesulfonamide as a solid.

Butyllithium (10.0 mmol) was added dropwise over a 20 min period to a cold (0 °C), mechanically stirred solution of the *N*-(*tert*-butyl)-4-isopropylbenzenesulfonamide (5.0 mmol) in anhydrous THF (25 mL) under a dry nitrogen atmosphere. After stirring an additional 25 min at 0 °C a precipitate formed. The suspension was cooled further to -78 °C and diethyl oxalate (15.0 mmol) was added. The cooling bath was removed and the suspension was stirred at ambient temperature for 3 h. The reaction was quenched with 10% HCl (15 mL) and added to water (80 mL). The organics were extracted with ethyl acetate (80 mL). The ether acetate phase was washed with brine (80 mL). The solvent was removed and the crude product was obtained used directly in the next step.

To the product obtained above, formic acid (20 mL) was added and the suspension was stirred at room temperature under a dry nitrogen atmosphere. After 5 min dissolution occurred. After 20 h the solution was concentrated and the resultant solid was dissolved in DCM and concentrated (three times) to remove traces of formic acid. The crude product was further purified by flash chromatography (PE:EA = 5:1) to give **1c**.

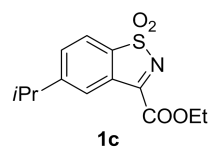

Ethyl 5-isopropylbenzo[d]isothiazole-3-carboxylate 1,1-dioxide (**1c**), 0.85 g, 60% yield, white solid, m.p.: 84–85 °C;  $^1\text{H}$  NMR (400 MHz,  $\text{CDCl}_3$ ):  $\delta$  8.11 (d,  $J$  = 1.6 Hz, 1H), 7.85 (d,  $J$  =

1.6 Hz, 1H), 7.62 (dd,  $J=7.2$ , 1.6 Hz, 1H), 4.55 (q,  $J=7.2$  Hz, 2H), 3.12-3.05 (m, 1H), 1.48 (t,  $J=7.2$  Hz, 3H), 1.31 (d,  $J=7.2$  Hz, 6H);  $^{13}\text{C}$  NMR (100 MHz,  $\text{CDCl}_3$ ):  $\delta$  160.6, 160.2, 156.7, 137.7, 132.4, 128.9, 125.6, 123.0, 63.8, 34.6, 23.7, 14.0; HRMS (ESI): calcd for  $\text{C}_{13}\text{H}_{16}\text{NO}_4\text{S}$   $[\text{M}+\text{H}]^+$  282.0800, found 282.0810.

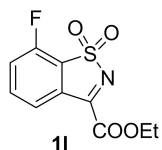

3-ethoxycarbonyl-2-fluorobenzo[d]isothiazole 1,1-dioxide (**11**). 0.76 g, 59% yield, white solid, m.p.: 117~118 °C;  $^1\text{H}$  NMR (400 MHz,  $\text{CDCl}_3$ ):  $\delta$  8.11 (d,  $J=7.6$  Hz, 1H), 7.80-7.75 (m, 1H), 7.48-7.44 (m, 1H), 4.55 (q,  $J=7.2$  Hz, 2H), 1.49 (t,  $J=7.1$  Hz, 3H);  $^{13}\text{C}$  NMR (100 MHz,  $\text{CDCl}_3$ )  $\delta$  160.0, 158.9 (d,  $J=3.0$  Hz), 157.2 (d,  $J=263.6$  Hz), 137.4 (d,  $J=6.9$  Hz), 131.0 (d,  $J=2.0$  Hz), 126.3 (d,  $J=20.2$  Hz), 123.5 (d,  $J=3.5$  Hz), 122.2 (d,  $J=19.6$  Hz), 64.0, 14.0; HRMS (ESI): calcd for  $\text{C}_{10}\text{H}_9\text{NO}_4\text{SF}$   $[\text{M}+\text{H}]^+$  258.0236, found 258.0221.

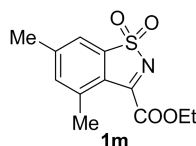

3-ethoxycarbonyl-5,7-dimethylbenzo[d]isothiazole 1,1-dioxide (**1m**). 0.72 g, 54% yield, white solid, m.p.: 132~133 °C;  $^1\text{H}$  NMR (400 MHz,  $\text{CDCl}_3$ )  $\delta$  7.59 (s, 1H), 7.29 (s, 1H), 4.54 (q,  $J=7.2$  Hz, 2H), 2.49 (s, 3H), 2.44 (s, 3H), 1.46 (t,  $J=7.2$  Hz, 3H);  $^{13}\text{C}$  NMR (100 MHz,  $\text{CDCl}_3$ )  $\delta$  162.81, 162.80, 146.5, 140.4, 137.3, 137.2, 124.0, 121.8, 63.8, 21.6, 18.7, 13.9; HRMS (ESI): calcd for  $\text{C}_{12}\text{H}_{14}\text{NO}_4\text{S}$   $[\text{M}+\text{H}]^+$  268.0644, found 268.0637.

### 3. General procedure for the synthesis of L15 and characterization data<sup>[2]</sup>

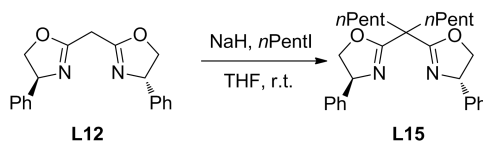

To a solution of **L12** (4.2 mmol) in THF (65 mL) in an ice bath was added 60% NaH (14.7 mmol). The mixture was stirred at room temperature for 1 h. The suspension was cooled further to 0 °C and 1-iodopentane (6.3 mmol) was added. The cooling bath was removed and the suspension was stirred at room temperature for 20 h. It was washed with brine. The organic layer was separated, and the aqueous layer was extracted with DCM (three times). The combined organic extracts were dried over anhydrous  $\text{Na}_2\text{SO}_4$ . The solvent was evaporated in vacuo to give the crude product.

To the product obtained above, redo above step to give the crude product. Then it was further purified by flash chromatography (PE:EA = 5:1) to give **L15**.

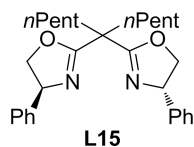

(4*S*,4'*S*)-2,2'-(undecane-6,6-diyl)bis(4-phenyl-4,5-dihydrooxazole) (**L15**), 1.41 g, 75% yield, colorless oil;  $^1\text{H}$  NMR (400 MHz,  $\text{CDCl}_3$ ):  $\delta$  7.34-7.31 (m, 4H), 7.28-7.24 (m, 6H), 5.24 (dd,  $J$

=10.4, 8.0 Hz, 2H), 4.65 (dd,  $J = 10.0, 8.0$  Hz, 2H), 4.12 (t,  $J = 8.0$  Hz, 2H), 2.13-2.06 (m, 4H), 1.39-1.26 (m, 12H), 0.91-0.85 (t,  $J = 6.8$  Hz, 6H);  $^{13}\text{C}$  NMR (100 MHz,  $\text{CDCl}_3$ ):  $\delta$  169.2, 142.4, 128.7, 127.5, 126.8, 75.0, 69.6, 46.3, 32.6, 32.0, 23.6, 22.5, 14.0; HRMS (ESI): calcd for  $\text{C}_{29}\text{H}_{39}\text{N}_2\text{O}_2$   $[\text{M}+\text{H}]^+$  447.3012, found 447.3003.

#### 4. Optimization reaction conditions<sup>[a],[b],[c]</sup>

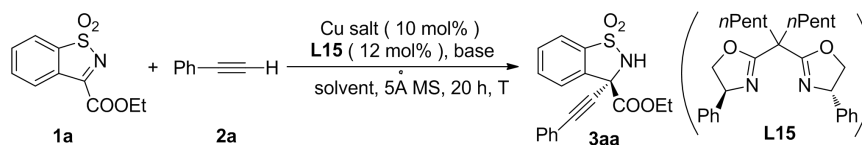

| entry             | Cu salt                                               | base                     | solvent                            | T (°C) | yield (%) | ee (%) |
|-------------------|-------------------------------------------------------|--------------------------|------------------------------------|--------|-----------|--------|
| 1                 | -                                                     | LiOAc                    | toluene                            | 80     | N.R.      | -      |
| 2                 | $\text{Cu}(\text{OAc})_2 \cdot \text{H}_2\text{O}$    | -                        | toluene                            | 80     | N.R.      | -      |
| 3                 | $\text{Cu}(\text{OAc})_2 \cdot \text{H}_2\text{O}$    | $\text{Li}_2\text{CO}_3$ | toluene                            | 80     | 54        | 68     |
| 4                 | $\text{Cu}(\text{OAc})_2 \cdot \text{H}_2\text{O}$    | $\text{Na}_2\text{CO}_3$ | toluene                            | 80     | 31        | 66     |
| 5                 | $\text{Cu}(\text{OAc})_2 \cdot \text{H}_2\text{O}$    | NaOAc                    | toluene                            | 80     | trace     | -      |
| 6                 | $\text{Cu}(\text{OAc})_2 \cdot \text{H}_2\text{O}$    | KOAc                     | toluene                            | 80     | trace     | -      |
| 7                 | $\text{Cu}(\text{OAc})_2 \cdot \text{H}_2\text{O}$    | $\text{K}_3\text{PO}_4$  | toluene                            | 80     | 40        | 60     |
| 8                 | $\text{Cu}(\text{OAc})_2 \cdot \text{H}_2\text{O}$    | LiOAc                    | toluene                            | 80     | 53        | 85     |
| 9                 | $\text{Cu}(\text{OAc})_2 \cdot \text{H}_2\text{O}$    | LiOAc                    | DCE                                | 80     | 42        | 73     |
| 10                | $\text{Cu}(\text{OAc})_2 \cdot \text{H}_2\text{O}$    | LiOAc                    | 1,4-dioxane                        | 80     | trace     | -      |
| 11                | $\text{Cu}(\text{OAc})_2 \cdot \text{H}_2\text{O}$    | LiOAc                    | $\text{C}_6\text{H}_5\text{OCH}_3$ | 80     | 28        | 38     |
| 12                | $\text{Cu}(\text{CH}_3\text{CN})_4\text{PF}_6$        | LiOAc                    | toluene                            | 80     | 43        | 50     |
| 13                | $\text{Cu}(\text{CH}_3\text{CN})_4\text{ClO}_4$       | LiOAc                    | toluene                            | 80     | 39        | 55     |
| 14                | CuBr                                                  | LiOAc                    | toluene                            | 80     | trace     | -      |
| 15                | $\text{Cu}(\text{Me}_2\text{S})\text{Br}$             | LiOAc                    | toluene                            | 80     | trace     | -      |
| 16                | $\text{CuBr}_2$                                       | LiOAc                    | toluene                            | 80     | trace     | -      |
| 17                | CuCl                                                  | LiOAc                    | toluene                            | 80     | 47        | 81     |
| 18                | $\text{Cu}(\text{OTf})_2$                             | LiOAc                    | toluene                            | 80     | trace     | -      |
| 19                | $(\text{CuOTf})_2 \cdot \text{C}_6\text{H}_6$         | LiOAc                    | toluene                            | 80     | trace     | -      |
| 20                | $\text{Cu}(\text{ClO}_4)_2 \cdot 6\text{H}_2\text{O}$ | LiOAc                    | toluene                            | 80     | 40        | 75     |
| 21                | $\text{Cu}(\text{acac})_2$                            | LiOAc                    | toluene                            | 80     | 74        | 73     |
| 22                | $\text{Cu}(\text{OAc})_2$                             | LiOAc                    | toluene                            | 80     | 37        | 89     |
| 23 <sup>[d]</sup> | $\text{Cu}(\text{OAc})_2$                             | LiOAc                    | toluene                            | 80     | 41        | 96     |
| 24 <sup>[e]</sup> | $\text{Cu}(\text{OAc})_2$                             | LiOAc                    | toluene                            | 80     | 67        | 96     |
| 25 <sup>[e]</sup> | $\text{Cu}(\text{OAc})_2$                             | LiOAc                    | toluene                            | 90     | 88        | 96     |

[a] Isolated Yield; [b] Determined by HPLC using a chiral Daicel column; [c] The absolute configuration of **3aa** was determined as *R* according to ref. [3]; [d] 15 mol% **L15** was added; [e] Reacted for two days.

## 5. General procedure for Cu-catalyzed alkylation of cyclic ketimines 1

Cu(OAc)<sub>2</sub> (1.8 mg, 10 mol %), 5 Å MS (60 mg) and **L15** (6.8 mg, 15 mol%) were stirred in toluene (1.0 mL) at 90 °C for 1 h. Cyclic ketimines **1a** (23.9 mg, 0.1 mmol) and LiOAc (6.6 mg, 1.0 eq.) were added. After 15 min, ethynylbenzene **2a** (16.5 μL, 1.5 eq.) was added and stirred at 90 °C for 2 days. After completion, the reaction mixture was cooled down to room temperature and then quenched with 10% aqueous HCl solution. The aqueous layer was extracted further with DCM three times; then the combined organic layer was dried over Na<sub>2</sub>SO<sub>4</sub>. After concentration in vacuo, the residue was finally purified by flash chromatography eluting with ethyl acetate and petroleum ether (1:5 to 1:3) to give the product **3aa** as a yellow solid (30.0 mg, 88%).

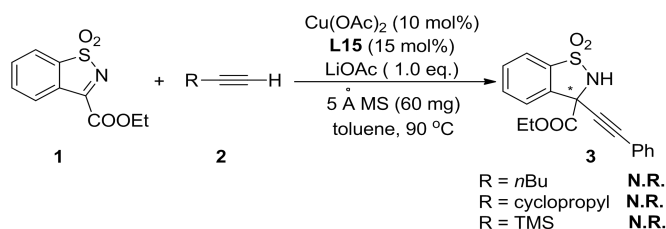

## 6. General procedure for Cu-catalyzed alkylation of cyclic ketimines 4

Cu(OAc)<sub>2</sub> (1.8 mg, 10 mol %), 5 Å MS (60 mg) and **L15** (6.8 mg, 15 mol%) were stirred in toluene (1.0 mL) at 105 °C for 1 h. Cyclic ketimines **4a** (23.9 mg, 0.1 mmol) and LiOAc (6.6 mg, 1.0 eq.) were added. After 15 min, ethynylbenzene **2a** (16.5 μL, 1.5 eq.) was added and stirred at 105 °C for 24 h. After completion, the reaction mixture was cooled down to room temperature and then quenched with 10% aqueous HCl solution. The aqueous layer was extracted further with DCM three times; then the combined organic layer was dried over Na<sub>2</sub>SO<sub>4</sub>. After concentration in vacuo, the residue was finally purified by flash chromatography eluting with ethyl acetate and petroleum ether (1:5 to 1:3) to give the product **5aa** as a yellow solid (25.4 mg, 74%).

The results of alkylation of cyclic ketimines **4c** and **4d** are as follow.

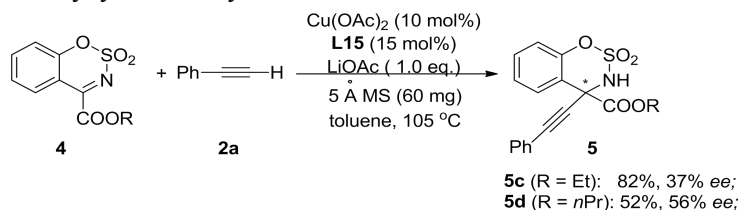

## 7. Characterization data and HPLC of addition products

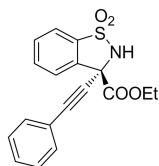

(*R*)-ethyl 3-(phenylethynyl)-2,3-dihydrobenzo[*d*]isothiazole-3-carboxylate 1,1-dioxide (**3aa**), 30.0 mg, 88% yield; <sup>1</sup>H NMR (400 MHz, CDCl<sub>3</sub>): δ 7.93 (d, *J* = 7.6 Hz, 1H), 7.79 (d, *J* = 7.6 Hz, 1H), 7.73 (t, *J* = 7.6 Hz, 1H), 7.64 (t, *J* = 7.6 Hz, 1H), 7.43 (d, *J* = 6.8 Hz, 2H), 7.37-7.29 (m, 3H), 5.90 (br, 1H), 4.43-4.34 (m, 2H), 1.37 (t, *J* = 7.2 Hz, 3H).<sup>[3]</sup>

HPLC: Daicel Chiralcel OD-H column (250 mm); detected at 220 nm; hexane/*i*-propanol = 85/15; flow = 0.5 mL/min; Retention time: 30.3 min; 37.7 min (major), 96% ee, [ $\alpha$ ]<sup>25</sup>: 45.539 (c

0.25, CHCl<sub>3</sub>).

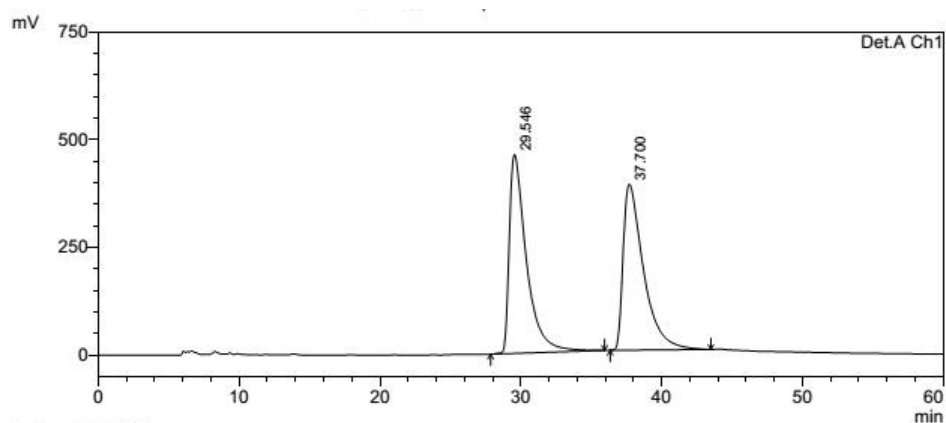

PeakTable

| Peak# | Ret. Time | Area     | Height | Area %  | Height % |
|-------|-----------|----------|--------|---------|----------|
| 1     | 29.546    | 38951870 | 461996 | 50.173  | 54.524   |
| 2     | 37.700    | 38682841 | 385323 | 49.827  | 45.476   |
| Total |           | 77634711 | 847318 | 100.000 | 100.000  |

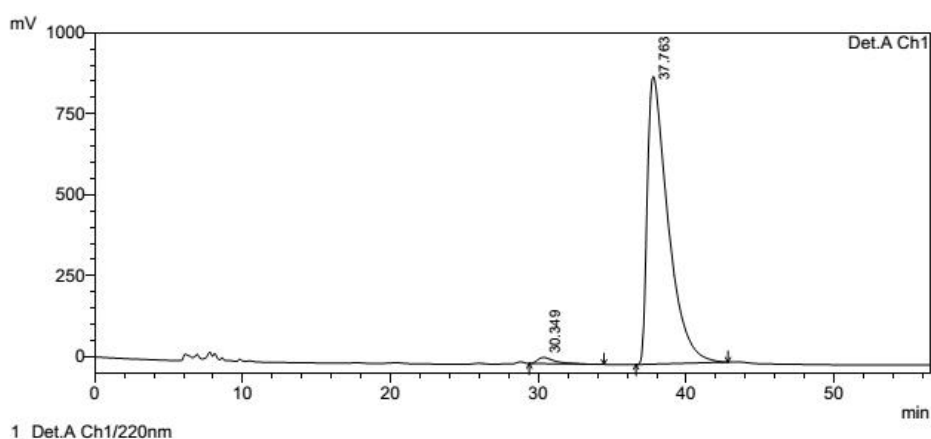

PeakTable

| Peak# | Ret. Time | Area     | Height | Area %  | Height % |
|-------|-----------|----------|--------|---------|----------|
| 1     | 30.349    | 1602717  | 19415  | 1.820   | 2.140    |
| 2     | 37.763    | 86460999 | 887614 | 98.180  | 97.860   |
| Total |           | 88063716 | 907029 | 100.000 | 100.000  |

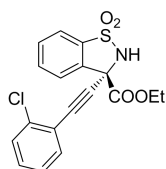

(*R*)-ethyl 3-((2-chlorophenyl)ethynyl)-2,3-dihydrobenzo[d]isothiazole-3-carboxylate 1,1-dioxide (**3ab**), 30.8 mg, 82% yield, yellow solid, m.p.: 89-90 °C; <sup>1</sup>H NMR (400 MHz, CDCl<sub>3</sub>): δ 7.97 (d, *J* = 7.6 Hz, 1H), 7.80 (d, *J* = 8.0 Hz, 1H), 7.73 (td, *J* = 7.6, 1.2 Hz, 1H), 7.65 (td, *J* = 8.0, 0.8 Hz, 1H), 7.46 (dd, *J* = 7.6, 1.6 Hz, 1H), 7.39 (dd, *J* = 8.0, 1.2 Hz, 1H), 7.30 (td, *J* = 7.6, 2.0 Hz, 1H), 7.21 (td, *J* = 7.6, 1.2 Hz, 1H), 5.90 (br, 1H), 4.45-4.34 (m, 2H), 1.39 (t, *J* = 7.2 Hz, 3H); <sup>13</sup>C NMR (100 MHz, CDCl<sub>3</sub>): δ 166.7, 136.6, 135.6, 134.2, 133.9, 133.6, 131.1, 130.4, 129.4, 126.5,

126.3, 121.4, 121.2, 89.2, 82.3, 64.7, 61.8, 14.0; HRMS (ESI): calcd for C<sub>18</sub>H<sub>15</sub>NO<sub>4</sub>Cl [M+H]<sup>+</sup> 376.0410, found 376.0419.

HPLC: Daicel Chiralcel OD-H column (250 mm); detected at 220 nm; hexane/*i*-propanol = 85/15; flow = 0.5 mL/min; Retention time: 33.4 min; 43.8 min (major), 92% *ee*, [ $\alpha$ ]<sup>25</sup>: 19.973 (c 0.20, CHCl<sub>3</sub>).

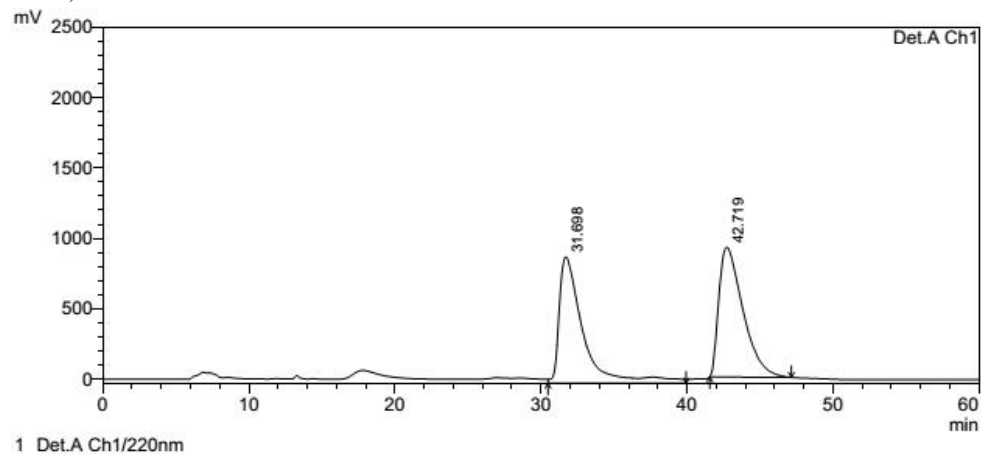

PeakTable

| Peak# | Ret. Time | Area      | Height  | Area %  | Height % |
|-------|-----------|-----------|---------|---------|----------|
| 1     | 31.698    | 102011842 | 896865  | 49.121  | 49.331   |
| 2     | 42.719    | 105663619 | 921205  | 50.879  | 50.669   |
| Total |           | 207675461 | 1818071 | 100.000 | 100.000  |

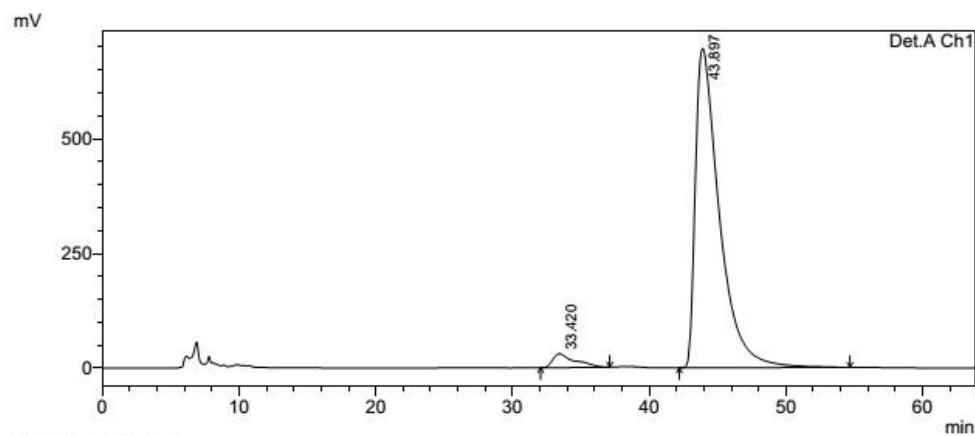

PeakTable

| Peak# | Ret. Time | Area     | Height | Area %  | Height % |
|-------|-----------|----------|--------|---------|----------|
| 1     | 33.420    | 3420231  | 29983  | 3.865   | 4.127    |
| 2     | 43.897    | 85072513 | 696608 | 96.135  | 95.873   |
| Total |           | 88492744 | 726591 | 100.000 | 100.000  |

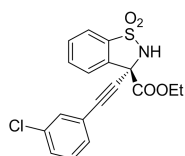

(*R*)-ethyl 3-((3-chlorophenyl)ethynyl)-2,3-dihydrobenzo[d]isothiazole-3-carboxylate 1,1-dioxide (**3ac**), 30.0 mg, 80% yield, yellow solid, m.p.: 93-94 °C; <sup>1</sup>H NMR (400 MHz, CDCl<sub>3</sub>): δ 7.91

(d,  $J = 8.0$  Hz, 1H), 7.80 (d,  $J = 8.0$  Hz, 1H), 7.74 (td,  $J = 7.6, 1.6$  Hz, 1H), 7.66 (td,  $J = 7.2, 0.8$  Hz, 1H), 7.43 (t,  $J = 1.6$  Hz, 1H), 7.34-7.30 (m, 2H), 7.24 (t,  $J = 8.0$  Hz, 1H), 5.90 (br, 1H), 4.45-4.36 (m, 2H), 1.38 (t,  $J = 7.2$  Hz, 3H);  $^{13}\text{C}$  NMR (100 MHz,  $\text{CDCl}_3$ ):  $\delta$  166.6, 135.7, 134.3, 134.2, 134.0, 131.9, 131.2, 130.2, 129.7, 129.6, 126.0, 122.7, 121.5, 85.4, 83.9, 64.8, 61.6, 14.0; HRMS (ESI): calcd for  $\text{C}_{18}\text{H}_{15}\text{NO}_4\text{SCl}$   $[\text{M}+\text{H}]^+$  376.0410, found 376.0424.

HPLC: Daicel Chiralcel OD-H column (250 mm); detected at 220 nm; hexane/*i*-propanol = 85/15; flow = 0.5 mL/min; Retention time: 28.9 min; 39.0 min (major), 85% *ee*,  $[\alpha]^{25}$ : 22.690 (c 0.25,  $\text{CHCl}_3$ ).

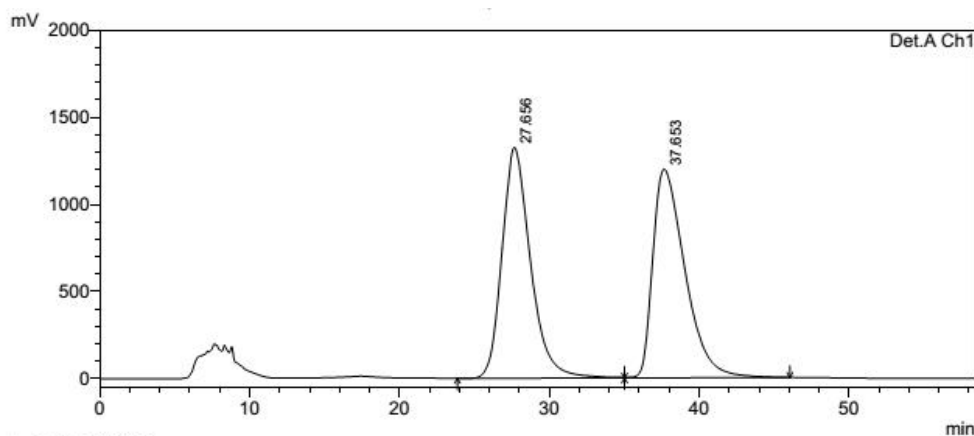

1 Det.A Ch1/220nm

PeakTable

Detector A Ch1 220nm

| Peak# | Ret. Time | Area      | Height  | Area %  | Height % |
|-------|-----------|-----------|---------|---------|----------|
| 1     | 27.656    | 175190153 | 1324878 | 49.578  | 52.525   |
| 2     | 37.653    | 178171618 | 1197520 | 50.422  | 47.475   |
| Total |           | 353361772 | 2522398 | 100.000 | 100.000  |

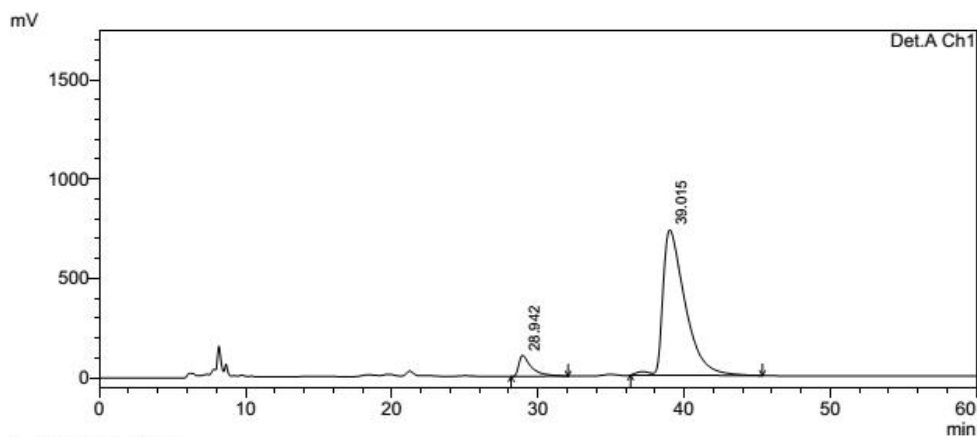

1 Det.A Ch1/220nm

PeakTable

Detector A Ch1 220nm

| Peak# | Ret. Time | Area     | Height | Area %  | Height % |
|-------|-----------|----------|--------|---------|----------|
| 1     | 28.942    | 6324209  | 106325 | 7.543   | 12.687   |
| 2     | 39.015    | 77512890 | 731759 | 92.457  | 87.313   |
| Total |           | 83837099 | 838084 | 100.000 | 100.000  |



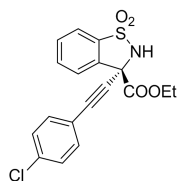

(*R*)-ethyl 3-((4-chlorophenyl)ethynyl)-2,3-dihydrobenzo[d]isothiazole-3-carboxylate 1,1-dioxide (**3ad**), 31.9 mg, 85% yield, yellow solid, m.p.: 122-123 °C; <sup>1</sup>H NMR (400 MHz, CDCl<sub>3</sub>): δ 7.91 (d, *J* = 8.0 Hz, 1H), 7.79 (d, *J* = 7.6 Hz, 1H), 7.73 (t, *J* = 7.6, 1H), 7.65 (t, *J* = 7.6, 1H), 7.36 (d, *J* = 8.0 Hz, 2H), 7.28 (d, *J* = 8.0 Hz, 2H), 5.90 (br, 1H), 4.43-4.36 (m, 2H), 1.37 (t, *J* = 7.2 Hz, 3H); <sup>13</sup>C NMR (100 MHz, CDCl<sub>3</sub>): δ 166.7, 135.7, 135.6, 134.2, 134.0, 133.2, 131.0, 128.7, 126.0, 121.4, 119.5, 85.2, 84.3, 64.7, 61.8, 14.0; HRMS (ESI): calcd for C<sub>18</sub>H<sub>15</sub>NO<sub>4</sub>SCl [M+H]<sup>+</sup> 376.0410, found 376.0413.

HPLC: Daicel Chiralcel OD-H column (250 mm); detected at 220 nm; hexane/*i*-propanol = 85/15; flow = 0.5 mL/min; Retention time: 30.2 min; 39.8 min (major), 98% *ee*, [ $\alpha$ ]<sup>25</sup>: 27.963 (c 0.20, CHCl<sub>3</sub>).

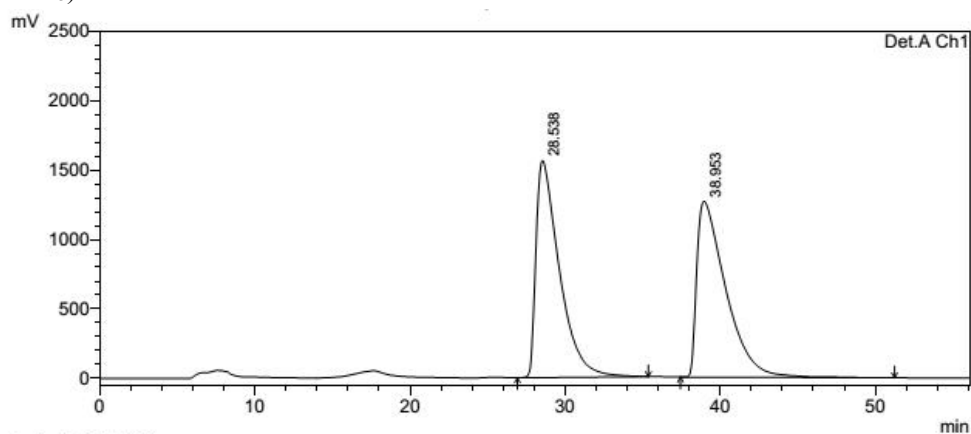

1 Det.A Ch1/220nm

PeakTable

| Peak# | Ret. Time | Area      | Height  | Area %  | Height % |
|-------|-----------|-----------|---------|---------|----------|
| 1     | 28.538    | 164030035 | 1562129 | 49.944  | 55.233   |
| 2     | 38.953    | 164396007 | 1266138 | 50.056  | 44.767   |
| Total |           | 328426042 | 2828267 | 100.000 | 100.000  |

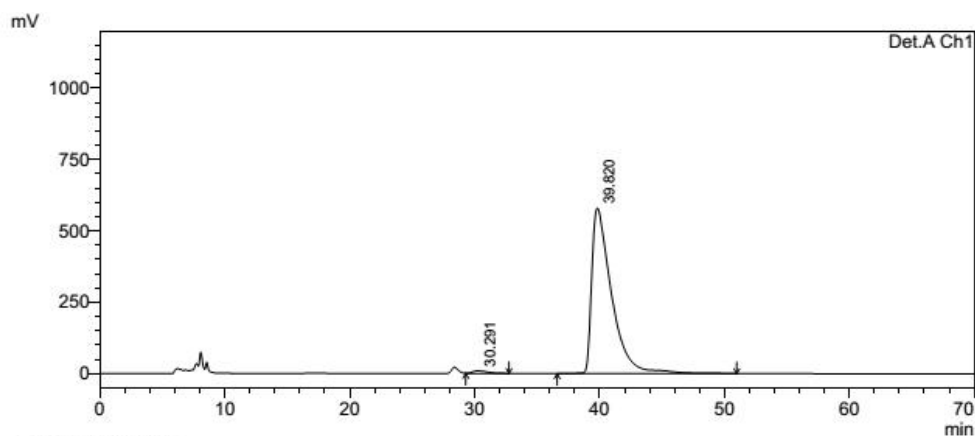

1 Det.A Ch1/220nm

PeakTable

| Peak# | Ret. Time | Area     | Height | Area %  | Height % |
|-------|-----------|----------|--------|---------|----------|
| 1     | 30.291    | 734007   | 8956   | 1.131   | 1.521    |
| 2     | 39.820    | 64152386 | 579818 | 98.869  | 98.479   |
| Total |           | 64886393 | 588774 | 100.000 | 100.000  |

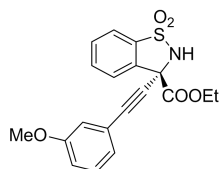

(*R*)-ethyl 3-((3-methoxyphenyl)ethynyl)-2,3-dihydrobenzo[d]isothiazole-3-carboxylate 1,1-dioxide (**3ae**), 24.1 mg, 65% yield, yellow oil;  $^1\text{H}$  NMR (400 MHz,  $\text{CDCl}_3$ ):  $\delta$  7.92 (d,  $J = 7.6$  Hz, 1H), 7.79 (d,  $J = 8.0$  Hz, 1H), 7.74 (td,  $J = 7.6$ , 1.2 Hz, 1H), 7.64 (td,  $J = 7.6$ , 0.8 Hz, 1H), 7.21 (t,  $J = 7.6$  Hz, 1H), 7.03 (d,  $J = 7.6$  Hz, 1H), 6.95-6.89 (m, 2H), 5.86 (br, 1H), 4.45-4.33 (m, 2H), 3.78 (s, 3H), 1.37 (t,  $J = 6.8$  Hz, 3H);  $^{13}\text{C}$  NMR (100 MHz,  $\text{CDCl}_3$ ):  $\delta$  166.8, 159.2, 135.8, 134.2, 133.9, 131.9, 129.4, 126.1, 124.5, 122.0, 121.3, 116.8, 116.1, 85.4, 84.0, 64.6, 61.8, 55.3, 14.0; HRMS (ESI): calcd for  $\text{C}_{19}\text{H}_{18}\text{NO}_5\text{S}$   $[\text{M}+\text{H}]^+$  372.0906, found 372.0900.

HPLC: Daicel Chiralcel OD-H column (250 mm); detected at 220 nm; hexane/*i*-propanol = 85/15; flow = 0.5 mL/min; Retention time: 37.7 min; 52.7 min (major), 91% *ee*,  $[\alpha]^{25}$ : 25.965 (c 0.20,  $\text{CHCl}_3$ ).

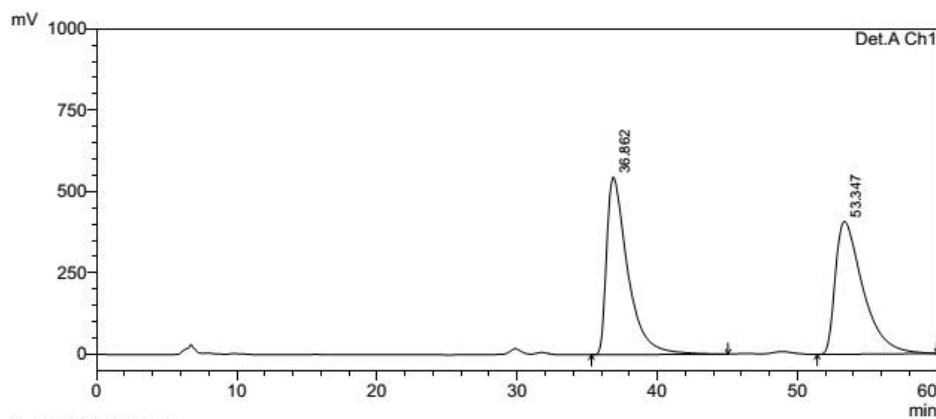

Detector A Ch1 220nm

PeakTable

| Peak# | Ret. Time | Area      | Height | Area %  | Height % |
|-------|-----------|-----------|--------|---------|----------|
| 1     | 36.862    | 57340963  | 545984 | 50.511  | 57.244   |
| 2     | 53.347    | 56180063  | 407792 | 49.489  | 42.756   |
| Total |           | 113521025 | 953775 | 100.000 | 100.000  |

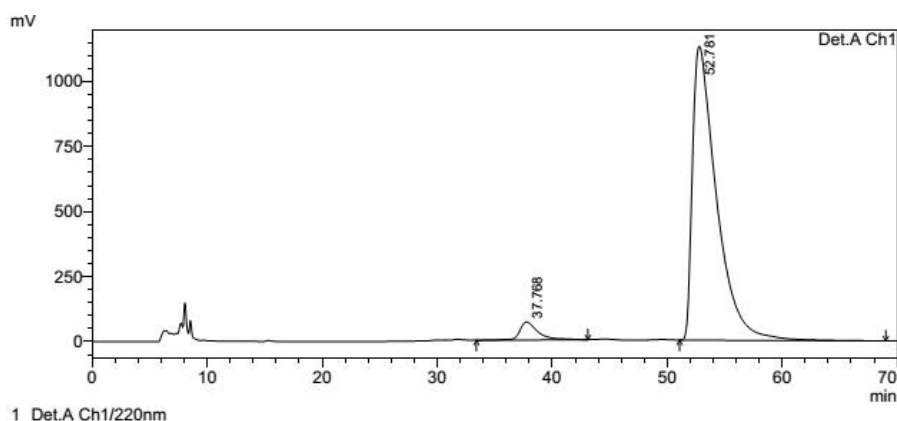

Detector A Ch1 220nm

PeakTable

| Peak# | Ret. Time | Area      | Height  | Area %  | Height % |
|-------|-----------|-----------|---------|---------|----------|
| 1     | 37.768    | 7672662   | 69183   | 4.457   | 5.767    |
| 2     | 52.781    | 164475763 | 1130399 | 95.543  | 94.233   |
| Total |           | 172148425 | 1199582 | 100.000 | 100.000  |

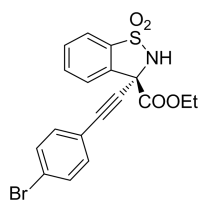

(*R*)-ethyl 3-((4-bromophenyl)ethynyl)-2,3-dihydrobenzo[d]isothiazole-3-carboxylate 1,1-dioxide (**3af**), 32.7 mg, 78% yield, yellow solid, m.p.: 126-127 °C; <sup>1</sup>H NMR (400 MHz, CDCl<sub>3</sub>): δ 7.90 (d, *J* = 7.6 Hz, 1H), 7.80 (d, *J* = 8.0 Hz, 1H), 7.73 (td, *J* = 7.2, 1.2 Hz, 1H), 7.65 (td, *J* = 7.6, 0.8 Hz, 1H), 7.46-7.43 (m, 2H), 7.30-7.28 (m, 2H), 5.86 (br, 1H), 4.44-4.35 (m, 2H), 1.37 (t, *J* = 7.2 Hz, 3H); <sup>13</sup>C NMR (100 MHz, CDCl<sub>3</sub>): δ 166.6, 135.7, 134.2, 133.9, 133.4, 131.7, 131.2, 126.0, 124.0, 121.4, 120.0, 85.3, 84.3, 64.7, 61.7, 14.0; HRMS (ESI): calcd for C<sub>18</sub>H<sub>15</sub>NO<sub>4</sub>SBr [M+H]<sup>+</sup> 419.9905, found 419.9899.

HPLC: Daicel Chiralcel OD-H column (250 mm); detected at 220 nm; hexane/*i*-propanol = 85/15; flow = 0.5 mL/min; Retention time: 32.1 min; 42.3 min (major), 98% *ee*, [ $\alpha$ ]<sub>D</sub><sup>25</sup>: 19.973 (c 0.20, CHCl<sub>3</sub>).

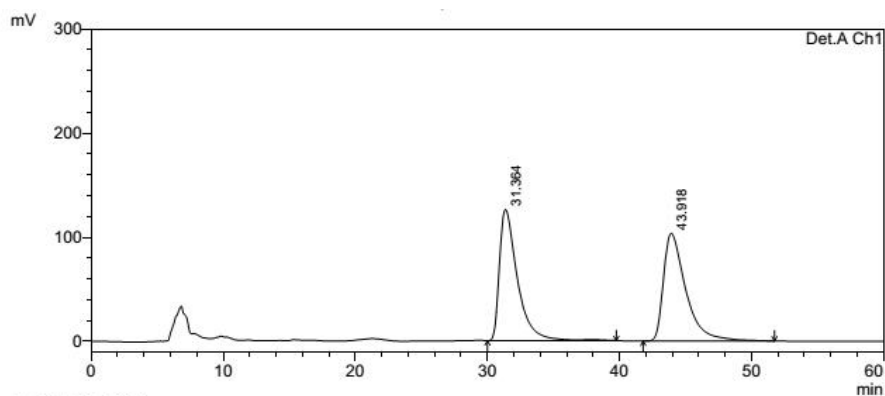

PeakTable

Detector A Ch1 220nm

| Peak# | Ret. Time | Area     | Height | Area %  | Height % |
|-------|-----------|----------|--------|---------|----------|
| 1     | 31.364    | 11998298 | 126052 | 49.634  | 54.927   |
| 2     | 43.918    | 12175349 | 103439 | 50.366  | 45.073   |
| Total |           | 24173647 | 229491 | 100.000 | 100.000  |

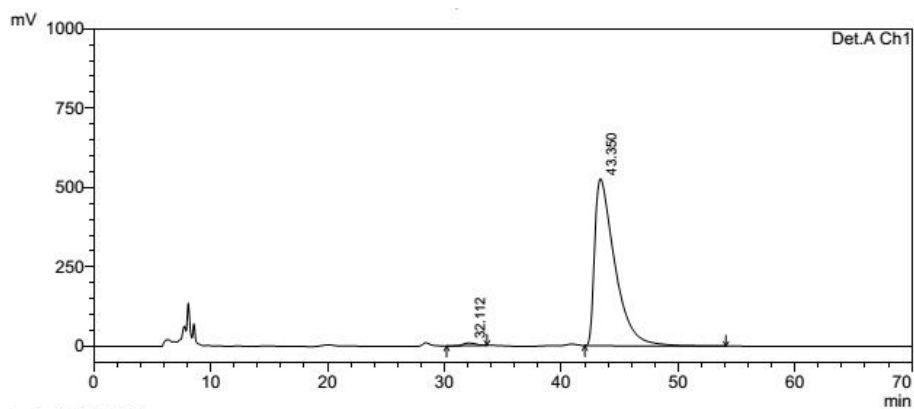

PeakTable

Detector A Ch1 220nm

| Peak# | Ret. Time | Area     | Height | Area %  | Height % |
|-------|-----------|----------|--------|---------|----------|
| 1     | 32.112    | 658224   | 8493   | 1.031   | 1.590    |
| 2     | 43.350    | 63170510 | 525650 | 98.969  | 98.410   |
| Total |           | 63828734 | 534143 | 100.000 | 100.000  |

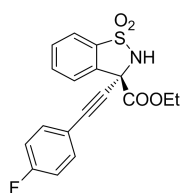

(*R*)-ethyl 3-((4-fluorophenyl)ethynyl)-2,3-dihydrobenzo[d]isothiazole-3-carboxylate 1,1-dioxide (**3ag**), 25.1 mg, 70% yield, yellow oil;  $^1\text{H}$  NMR (400 MHz,  $\text{CDCl}_3$ ):  $\delta$  7.91 (d,  $J = 8.0$  Hz, 1H), 7.79 (d,  $J = 8.0$  Hz, 1H), 7.73 (td,  $J = 7.6, 1.2$  Hz, 1H), 7.65 (td,  $J = 8.0, 0.8$  Hz, 1H), 7.44-7.40 (m, 2H), 7.00-6.98 (m, 2H), 5.86 (br, 1H), 4.45-4.33 (m, 2H), 1.37 (t,  $J = 7.2$  Hz, 3H);  $^{13}\text{C}$  NMR (100 MHz,  $\text{CDCl}_3$ ):  $\delta$  166.8, 165.6 (d,  $J = 249.7$  Hz), 135.9, 134.3, 134.1 (d,  $J = 8.5$  Hz), 133.9, 131.1, 126.0, 121.3, 117.1 (d,  $J = 3.5$  Hz), 115.7 (d,  $J = 22.1$  Hz), 84.4, 84.0, 64.6, 61.7, 14.0; HRMS (ESI): calcd for  $\text{C}_{18}\text{H}_{15}\text{NO}_4\text{SF}$   $[\text{M}+\text{H}]^+$  360.0706, found 360.0714.

HPLC: Daicel Chiralcel OD-H column (250 mm); detected at 220 nm; hexane/*i*-propanol = 85/15; flow = 0.5 mL/min; Retention time: 29.0 min; 36.7 min (major), 93% *ee*,  $[\alpha]^{25}$ : 24.967 (c 0.20,  $\text{CHCl}_3$ ).

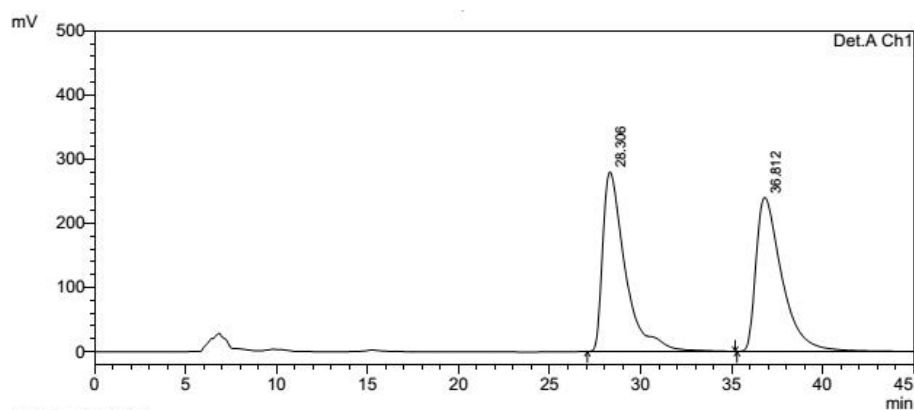

1 Det.A Ch1/220nm

PeakTable

Detector A Ch1 220nm

| Peak# | Ret. Time | Area     | Height | Area %  | Height % |
|-------|-----------|----------|--------|---------|----------|
| 1     | 28.306    | 24156729 | 279752 | 50.452  | 53.830   |
| 2     | 36.812    | 23723804 | 239946 | 49.548  | 46.170   |
| Total |           | 47880533 | 519698 | 100.000 | 100.000  |

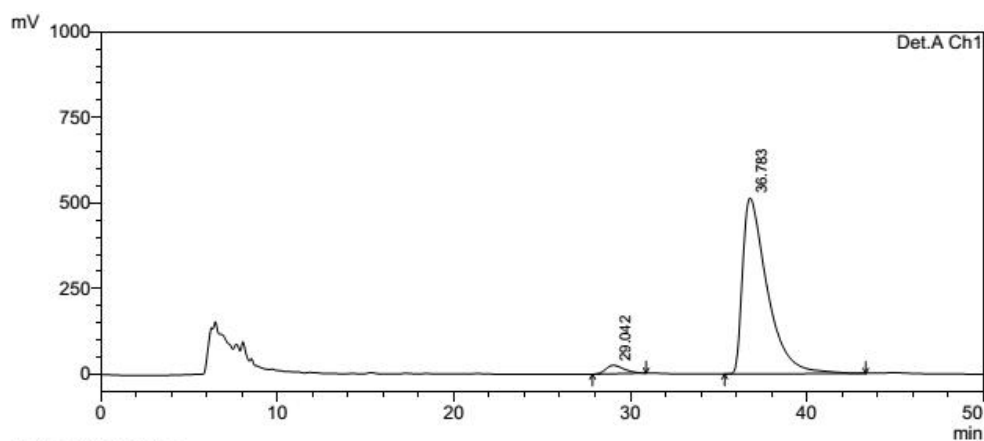

1 Det.A Ch1/220nm

PeakTable

Detector A Ch1 220nm

| Peak# | Ret. Time | Area     | Height | Area %  | Height % |
|-------|-----------|----------|--------|---------|----------|
| 1     | 29.042    | 1755670  | 24532  | 3.398   | 4.557    |
| 2     | 36.783    | 49913747 | 513804 | 96.602  | 95.443   |
| Total |           | 51669417 | 538336 | 100.000 | 100.000  |

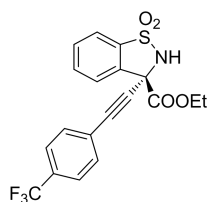

(*R*)-ethyl 3-((4-(trifluoromethyl)phenyl)ethynyl)-2,3-dihydrobenzo[d]isothiazole-3-carboxylate 1,1-dioxide (**3ah**), 37.2 mg, 91% yield; <sup>1</sup>H NMR (400 MHz, CDCl<sub>3</sub>): δ 7.91 (d, *J* = 8.0 Hz, 1H), 7.81 (d, *J* = 7.6 Hz, 1H), 7.74 (t, *J* = 7.6 Hz, 1H), 7.66 (t, *J* = 7.2 Hz, 1H), 7.58-7.53 (m, 4H), 5.91 (br, 1H), 4.45-4.37 (m, 2H), 1.39 (t, *J* = 7.2 Hz, 3H).<sup>[3]</sup>

HPLC: Daicel Chiralcel OD-H column (250 mm); detected at 220 nm; hexane/*i*-propanol = 85/15; flow = 0.5 mL/min; Retention time: 25.8 min; 35.3 min (major), 98% *ee*, [ $\alpha$ ]<sup>25</sup>: 40.945 (c 0.20, CHCl<sub>3</sub>).

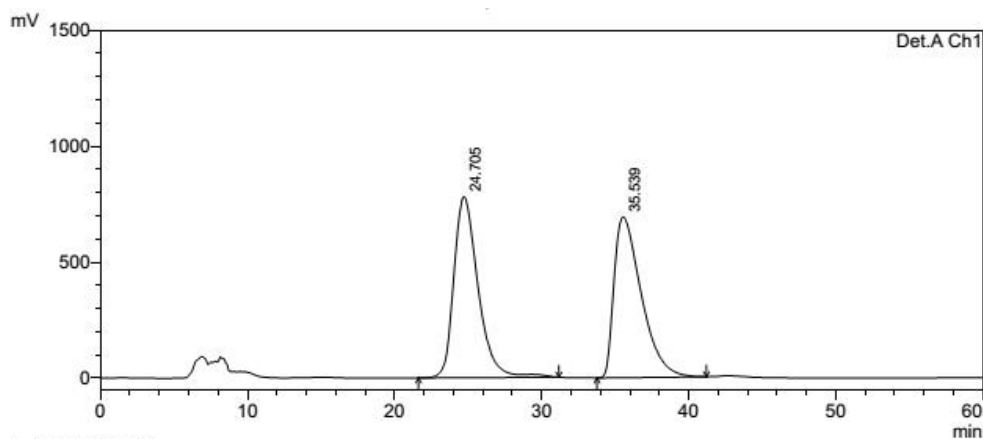

PeakTable

Detector A Ch1 220nm

| Peak# | Ret. Time | Area      | Height  | Area %  | Height % |
|-------|-----------|-----------|---------|---------|----------|
| 1     | 24.705    | 89721128  | 781717  | 50.119  | 53.011   |
| 2     | 35.539    | 89294737  | 692929  | 49.881  | 46.989   |
| Total |           | 179015865 | 1474646 | 100.000 | 100.000  |

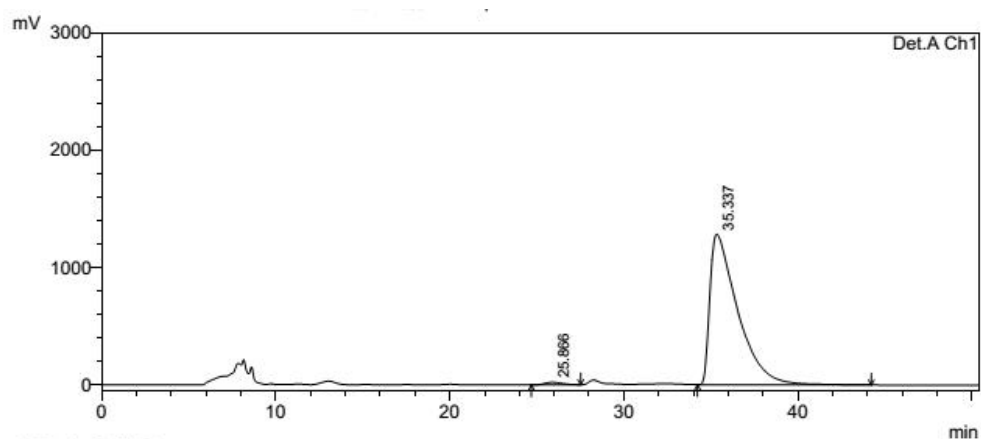

PeakTable

Detector A Ch1 220nm

| Peak# | Ret. Time | Area      | Height  | Area %  | Height % |
|-------|-----------|-----------|---------|---------|----------|
| 1     | 25.866    | 1550381   | 21666   | 1.081   | 1.661    |
| 2     | 35.337    | 141904923 | 1282679 | 98.919  | 98.339   |
| Total |           | 143455303 | 1304345 | 100.000 | 100.000  |

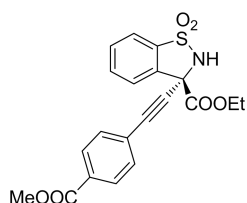

(*R*)-ethyl 3-((4-(methoxycarbonyl)phenyl)ethynyl)-2,3-dihydrobenzo[*d*]isothiazole-3-carboxylate 1,1-dioxide (**3ai**), 37.1 mg, 93% yield, yellow oil; <sup>1</sup>H NMR (400 MHz, CDCl<sub>3</sub>): δ 7.67 (d, *J* = 8.0 Hz, 2H), 7.92 (d, *J* = 8.0 Hz, 1H), 7.80 (d, *J* = 7.6 Hz, 1H), 7.73 (t, *J* = 8.0 Hz, 1H), 7.65 (t, *J* = 7.2 Hz, 1H), 7.49 (d, *J* = 8.0 Hz, 2H), 5.93 (br, 1H), 4.43-4.38 (m, 2H), 3.91 (s, 3H), 1.38 (t, *J* = 7.2 Hz, 3H); <sup>13</sup>C NMR (100 MHz, CDCl<sub>3</sub>): δ 166.6, 166.3, 135.6, 134.2, 134.0, 132.0, 131.2, 130.6, 129.5, 126.0, 125.6, 121.5, 86.9, 84.5, 64.8, 61.7, 52.4, 14.0; HRMS (ESI): calcd for C<sub>20</sub>H<sub>18</sub>NO<sub>6</sub>S [M+H]<sup>+</sup> 400.0855, found 400.0847.

HPLC: Daicel Chiralcel OD-H column (250 mm); detected at 220 nm; hexane/*i*-propanol =

85/15; flow = 0.5 mL/min; Retention time: 49.9 min; 60.2 min (major), 98% *ee*,  $[\alpha]^{25}$ : 39.512 (c 0.46, CHCl<sub>3</sub>).

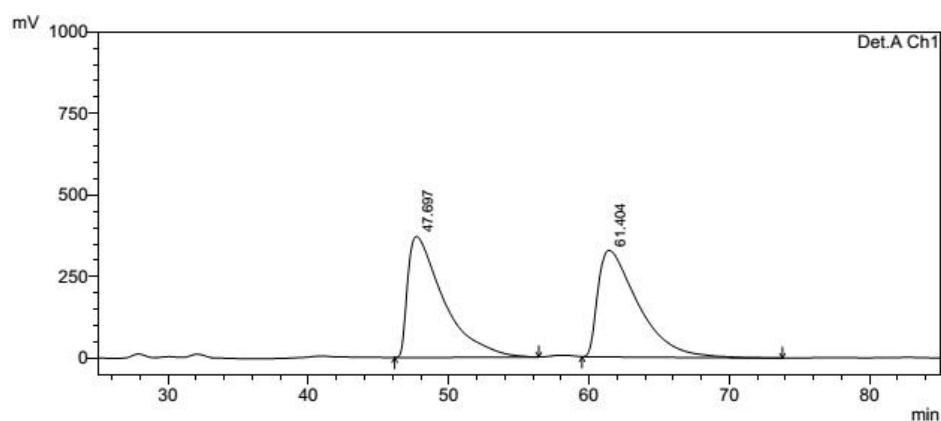

PeakTable

| Peak# | Ret. Time | Area      | Height | Area %  | Height % |
|-------|-----------|-----------|--------|---------|----------|
| 1     | 47.697    | 65997003  | 370502 | 50.230  | 53.180   |
| 2     | 61.404    | 65392933  | 326195 | 49.770  | 46.820   |
| Total |           | 131389935 | 696698 | 100.000 | 100.000  |

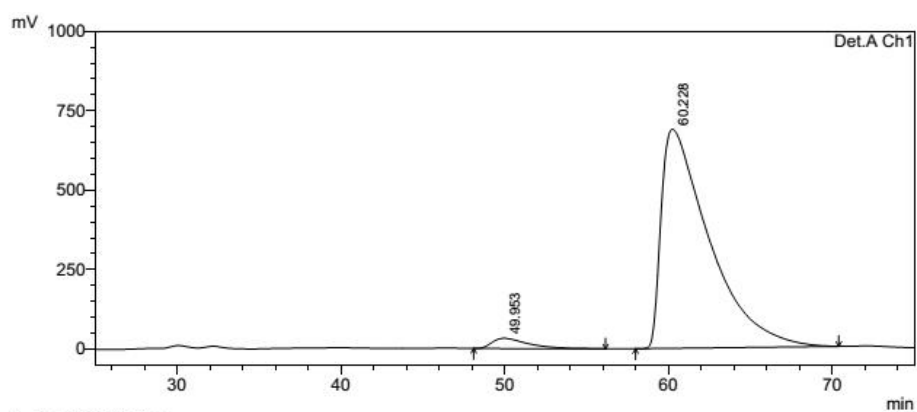

PeakTable

| Peak# | Ret. Time | Area      | Height | Area %  | Height % |
|-------|-----------|-----------|--------|---------|----------|
| 1     | 49.953    | 4981571   | 32365  | 3.413   | 4.484    |
| 2     | 60.228    | 140964132 | 689396 | 96.587  | 95.516   |
| Total |           | 145945703 | 721760 | 100.000 | 100.000  |

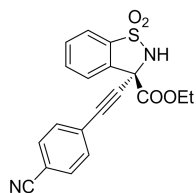

(*R*)-ethyl 3-((4-cyanophenyl)ethynyl)-2,3-dihydrobenzo[d]isothiazole-3-carboxylate 1,1-dioxide (**3aj**), 34.4 mg, 94% yield, yellow oil; <sup>1</sup>H NMR (400 MHz, CDCl<sub>3</sub>): δ 7.89 (d, *J* = 8.0 Hz, 1H), 7.80 (d, *J* = 8.0 Hz, 1H), 7.73 (td, *J* = 7.6, 1.2 Hz, 1H), 7.66 (td, *J* = 8.0, 0.8 Hz, 1H), 7.60-7.58 (m, 2H), 7.52-7.50 (m, 2H), 5.94 (br, 1H), 4.45-4.37 (m, 2H), 1.38 (t, *J* = 7.2 Hz, 3H); <sup>13</sup>C NMR (100 MHz, CDCl<sub>3</sub>): δ 166.4, 135.4, 134.3, 134.1, 132.6, 132.0, 131.4, 125.9, 125.8, 121.6, 118.1, 112.8, 88.4, 83.4, 64.9, 61.5, 14.0; HRMS (ESI): calcd for C<sub>19</sub>H<sub>15</sub>N<sub>2</sub>O<sub>4</sub>S [M+H]<sup>+</sup> 367.0753, found 367.0763.

HPLC: Daicel Chiralcel OD-H column (250 mm); detected at 220 nm; hexane/*i*-propanol = 85/15; flow = 0.5 mL/min; Retention time: 90.0 min; 96.5 min (major), 98% *ee*,  $[\alpha]^{25}$ : 16.286 (c 0.65, CHCl<sub>3</sub>).

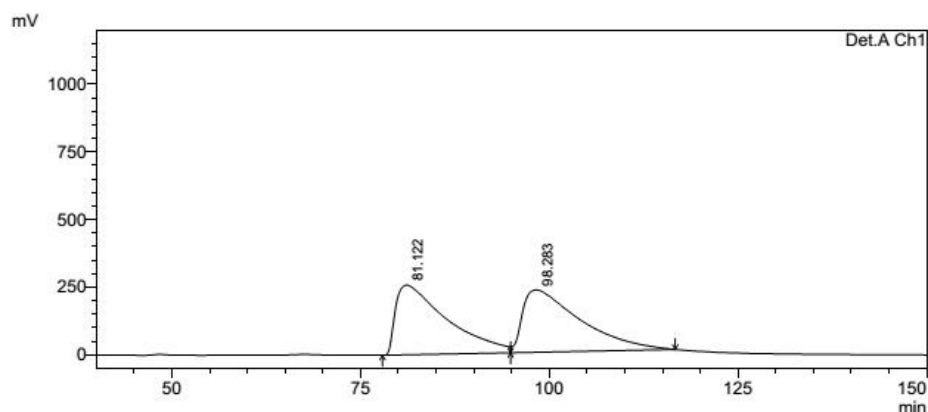

PeakTable

| Peak# | Ret. Time | Area      | Height | Area %  | Height % |
|-------|-----------|-----------|--------|---------|----------|
| 1     | 81.122    | 121033750 | 257740 | 49.692  | 52.773   |
| 2     | 98.283    | 122532685 | 230650 | 50.308  | 47.227   |
| Total |           | 243566435 | 488390 | 100.000 | 100.000  |

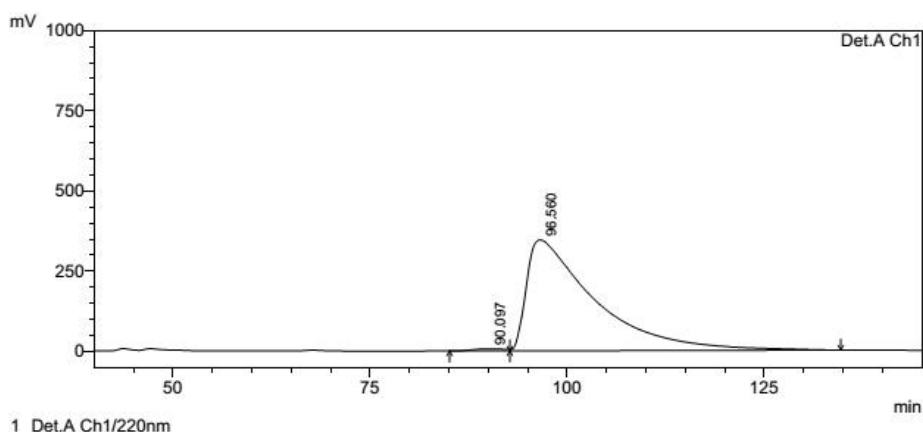

PeakTable

| Peak# | Ret. Time | Area      | Height | Area %  | Height % |
|-------|-----------|-----------|--------|---------|----------|
| 1     | 90.097    | 1819004   | 6343   | 0.868   | 1.804    |
| 2     | 96.560    | 207710587 | 345270 | 99.132  | 98.196   |
| Total |           | 209529591 | 351614 | 100.000 | 100.000  |

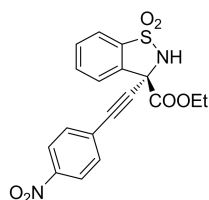

(*R*)-ethyl 3-((4-nitrophenyl)ethynyl)-2,3-dihydrobenzo[*d*]isothiazole-3-carboxylate 1,1-dioxide (**3ak**), 34.7 mg, 90% yield, yellow oil; <sup>1</sup>H NMR (400 MHz, CDCl<sub>3</sub>): δ 8.18-8.15 (m, 2H), 7.91 (d, *J* = 8.0 Hz, 1H), 7.81 (d, *J* = 8.0 Hz, 1H), 7.74 (td, *J* = 7.2, 1.2 Hz, 1H), 7.67 (td, *J* = 7.6, 1.2 Hz, 1H), 7.60-7.57 (m, 2H), 5.96 (br, 1H), 4.46-4.38 (m, 2H), 1.39 (t, *J* = 7.2 Hz, 3H); <sup>13</sup>C NMR (100 MHz, CDCl<sub>3</sub>): δ 166.3, 147.8, 135.3, 134.3, 134.1, 132.9, 131.4, 127.8, 125.8, 123.6, 121.6, 89.1, 83.1, 65.0, 61.5, 14.0; HRMS (ESI): calcd for C<sub>18</sub>H<sub>15</sub>N<sub>2</sub>O<sub>6</sub>S [M+H]<sup>+</sup> 387.0651, found



387.0664.

HPLC: Daicel Chiralcel OD-H column (250 mm); detected at 220 nm; hexane/*i*-propanol = 85/15; flow = 0.5 mL/min; Retention time: 107.9 min; 116.4 min (major), 96% *ee*,  $[\alpha]_D^{25}$ : 32.684 (c 0.22, CHCl<sub>3</sub>).

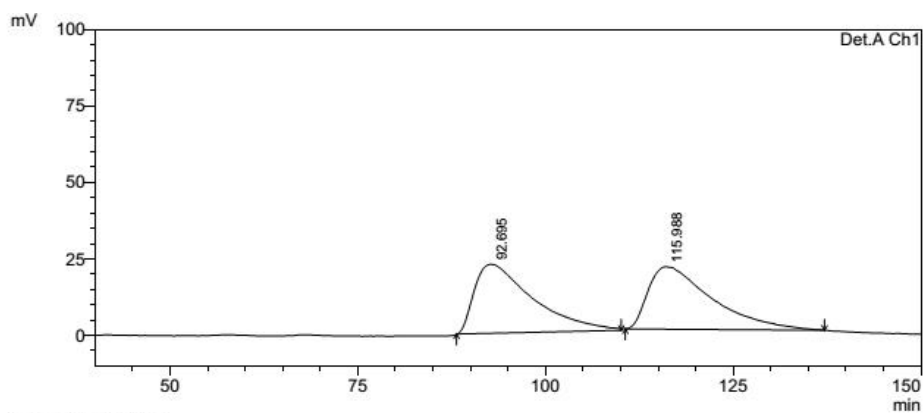

1 Det.A Ch1/220nm

PeakTable

| Peak# | Ret. Time | Area     | Height | Area %  | Height % |
|-------|-----------|----------|--------|---------|----------|
| 1     | 92.695    | 12168049 | 22536  | 50.234  | 52.499   |
| 2     | 115.988   | 12054705 | 20391  | 49.766  | 47.501   |
| Total |           | 24222755 | 42928  | 100.000 | 100.000  |

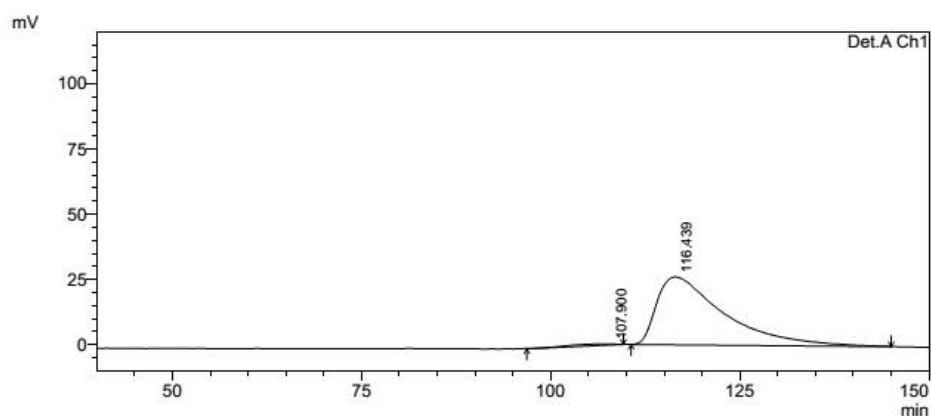

1 Det.A Ch1/220nm

PeakTable

| Peak# | Ret. Time | Area     | Height | Area %  | Height % |
|-------|-----------|----------|--------|---------|----------|
| 1     | 107.900   | 299126   | 460    | 1.833   | 1.730    |
| 2     | 116.439   | 16024015 | 26098  | 98.167  | 98.270   |
| Total |           | 16323141 | 26558  | 100.000 | 100.000  |

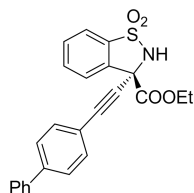

(*R*)-ethyl 3-([1,1'-biphenyl]-4-ylethynyl)-2,3-dihydrobenzo[d]isothiazole-3-carboxylate 1,1-dioxide (**3a1**), 31.3 mg, 75% yield, yellow solid, m.p.: 95-96 °C; <sup>1</sup>H NMR (400 MHz, CDCl<sub>3</sub>): δ 7.94 (d, *J* = 8.0 Hz, 1H), 7.81-7.80 (m, 1H), 7.73 (td, *J* = 7.2, 0.8 Hz, 1H), 7.64 (td, *J* = 7.6, 0.8 Hz, 1H), 7.57-7.48 (m, 6H), 7.46-7.41 (m, 2H), 7.37-7.33 (m, 1H), 5.90 (br, 1H), 4.46-4.33 (m, 2H), 1.38 (t, *J* = 7.2 Hz, 3H); <sup>13</sup>C NMR (100 MHz, CDCl<sub>3</sub>): δ 166.9, 142.2, 140.0, 136.0, 134.2,

133.9, 132.5, 131.1, 128.9, 127.9, 127.1, 127.0, 126.2, 121.4, 119.9, 85.4, 84.8, 65.0, 61.9, 14.0;  
 HRMS (ESI): calcd for C<sub>24</sub>H<sub>20</sub>NO<sub>4</sub>S [M+H]<sup>+</sup> 418.1113, found 418.1110.

HPLC: Daicel Chiralcel OD-H column (250 mm); detected at 220 nm; hexane/*i*-propanol = 85/15; flow = 0.5 mL/min; Retention time: 57.2 min; 65.1 min (major), 96% *ee*, [ $\alpha$ ]<sub>D</sub><sup>25</sup>: 29.461 (c 0.40, CHCl<sub>3</sub>).

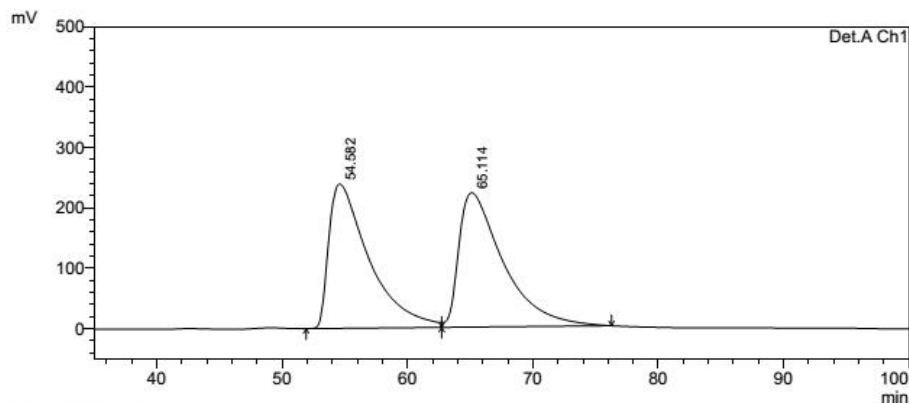

1 Det.A Ch1/220nm

PeakTable

| Peak# | Ret. Time | Area      | Height | Area %  | Height % |
|-------|-----------|-----------|--------|---------|----------|
| 1     | 54.582    | 53550536  | 238932 | 49.375  | 51.787   |
| 2     | 65.114    | 54907293  | 222446 | 50.625  | 48.213   |
| Total |           | 108457828 | 461378 | 100.000 | 100.000  |

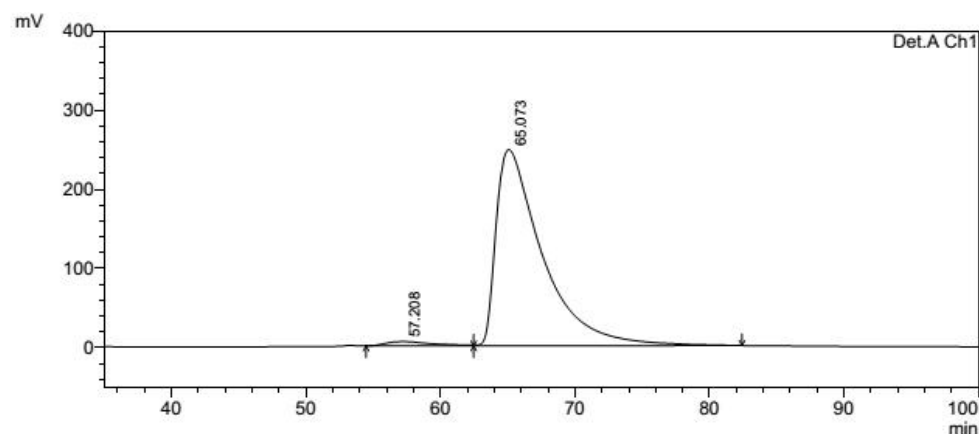

1 Det.A Ch1/220nm

PeakTable

| Peak# | Ret. Time | Area     | Height | Area %  | Height % |
|-------|-----------|----------|--------|---------|----------|
| 1     | 57.208    | 1358870  | 5686   | 2.230   | 2.244    |
| 2     | 65.073    | 59585268 | 247704 | 97.770  | 97.756   |
| Total |           | 60944138 | 253389 | 100.000 | 100.000  |

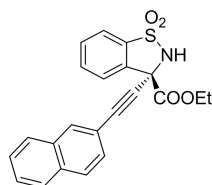

(*R*)-ethyl 3-(naphthalen-2-ylethynyl)-2,3-dihydrobenzo[d]isothiazole-3-carboxylate 1,1-dioxide (**3am**), 23.0 mg, 59% yield, yellow solid, m.p.: 103-104 °C; <sup>1</sup>H NMR (400 MHz, CDCl<sub>3</sub>): δ 7.98-7.97 (m, 2 H), 7.82-7.73 (m, 5 H), 7.65 (t, *J* = 7.6 Hz, 1H), 7.50-7.44 (m, 3H), 5.94 (br, 1H), 4.46-4.37 (m, 2H), 1.40 (t, *J* = 7.2 Hz, 3H); <sup>13</sup>C NMR (100 MHz, CDCl<sub>3</sub>): δ 166.9, 136.0, 134.3, 134.0, 133.2, 132.7, 132.5, 131.1, 128.1, 127.9, 127.8, 127.3, 126.8, 126.2, 121.4, 118.3, 85.8,

84.5, 64.6, 61.9, 14.0; HRMS (ESI): calcd for C<sub>22</sub>H<sub>18</sub>NO<sub>4</sub>S [M+H]<sup>+</sup> 392.0957, found 392.0949.

HPLC: Daicel Chiralcel OD-H column (250 mm); detected at 220 nm; hexane/*i*-propanol = 85/15; flow = 0.5 mL/min; Retention time: 48.5 min; 59.4 min (major), 91% *ee*, [ $\alpha$ ]<sub>D</sub><sup>25</sup>: 24.178 (c 0.19, CHCl<sub>3</sub>).

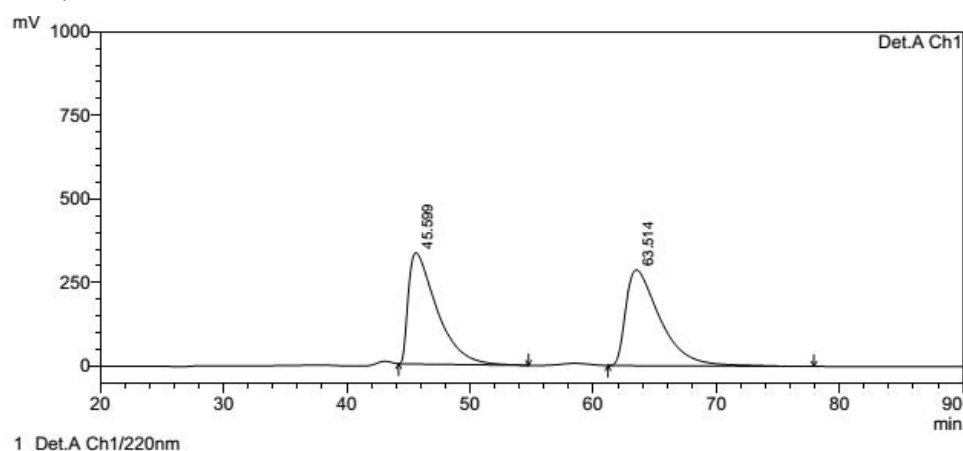

PeakTable

| Peak# | Ret. Time | Area      | Height | Area %  | Height % |
|-------|-----------|-----------|--------|---------|----------|
| 1     | 45.599    | 53775307  | 332914 | 49.199  | 53.805   |
| 2     | 63.514    | 55525435  | 285831 | 50.801  | 46.195   |
| Total |           | 109300742 | 618746 | 100.000 | 100.000  |

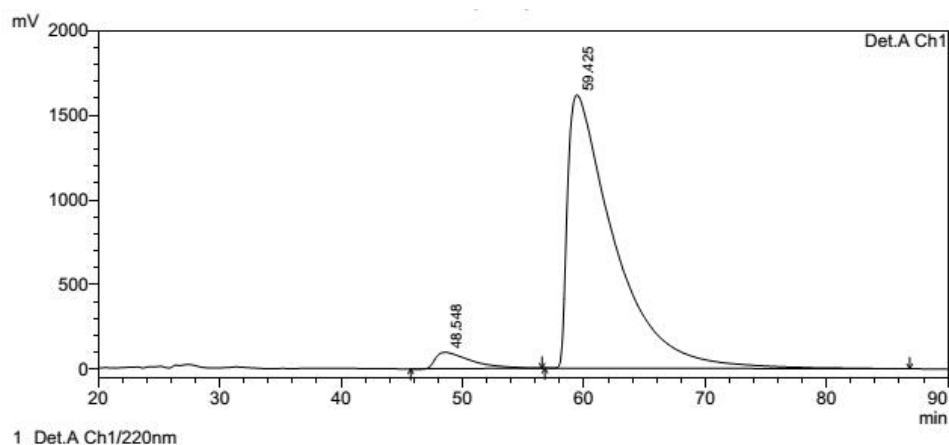

PeakTable

| Peak# | Ret. Time | Area      | Height  | Area %  | Height % |
|-------|-----------|-----------|---------|---------|----------|
| 1     | 48.548    | 19647465  | 97167   | 4.340   | 5.679    |
| 2     | 59.425    | 433100103 | 1613879 | 95.660  | 94.321   |
| Total |           | 452747568 | 1711047 | 100.000 | 100.000  |

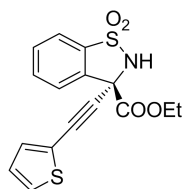

(*R*)-ethyl 3-(thiophen-2-ylethynyl)-2,3-dihydrobenzo[d]isothiazole-3-carboxylate 1,1-dioxide (**3an**), 28.1 mg, 81% yield, yellow solid, m.p.: 93-94 °C; <sup>1</sup>H NMR (400 MHz, CDCl<sub>3</sub>): δ 7.91 (d, *J* = 7.6 Hz, 1 H), 7.79 (d, *J* = 7.6 Hz, 1 H), 7.73 (t, *J* = 8.0 Hz, 1H), 7.65 (t, *J* = 7.6 Hz, 1H), 7.31 (dd, *J* = 4.6, 1.2 Hz, 1H), 7.27-7.26 (m, 1H), 6.98-6.96 (m, 1H), 5.85 (br, 1H), 4.46-4.33 (m, 2H), 1.37 (t, *J* = 7.2 Hz, 3H); <sup>13</sup>C NMR (100 MHz, CDCl<sub>3</sub>): δ 166.6, 135.6, 134.2, 134.0, 133.8, 131.1,

128.6, 127.1, 126.1, 121.4, 120.8, 87.9, 79.0, 64.7, 61.9, 14.0; HRMS (ESI): calcd for C<sub>16</sub>H<sub>14</sub>NO<sub>4</sub>S<sub>2</sub> [M+H]<sup>+</sup> 348.0364, found 348.0357.

HPLC: Daicel Chiralcel OD-H column (250 mm); detected at 220 nm; hexane/*i*-propanol = 90/10; flow = 0.5 mL/min; Retention time: 60.7 min; 68.2 min (major), 93% *ee*, [ $\alpha$ ]<sub>D</sub><sup>25</sup>: 35.785 (c 0.24, CHCl<sub>3</sub>).

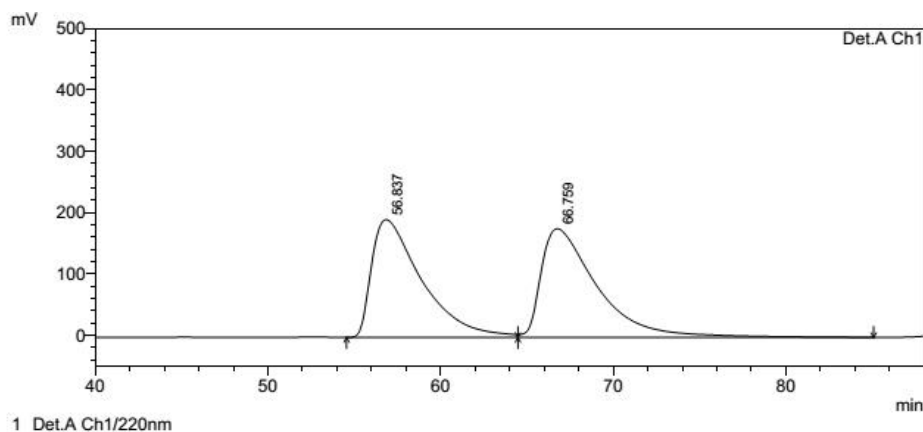

Detector A Ch1 220nm

| Peak# | Ret. Time | Area     | Height | Area %  | Height % |
|-------|-----------|----------|--------|---------|----------|
| 1     | 56.837    | 38819266 | 191962 | 49.238  | 51.994   |
| 2     | 66.759    | 40020611 | 177241 | 50.762  | 48.006   |
| Total |           | 78839877 | 369203 | 100.000 | 100.000  |

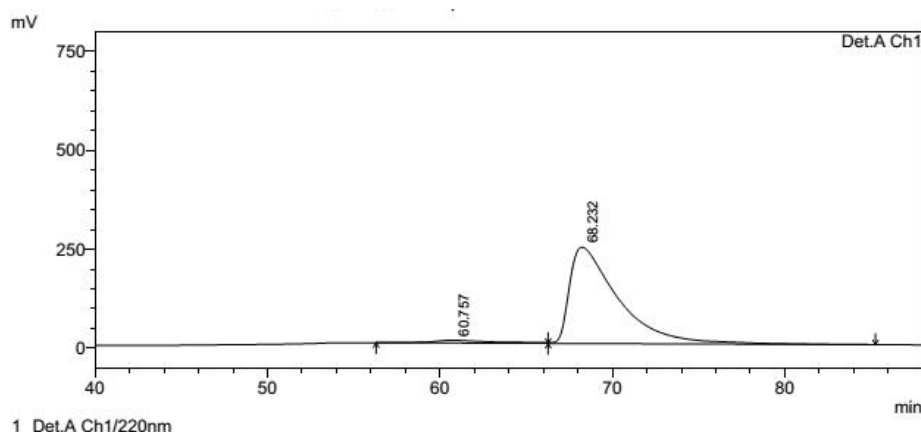

Detector A Ch1 220nm

| Peak# | Ret. Time | Area     | Height | Area %  | Height % |
|-------|-----------|----------|--------|---------|----------|
| 1     | 60.757    | 1775134  | 6854   | 3.571   | 2.740    |
| 2     | 68.232    | 47930678 | 243279 | 96.429  | 97.260   |
| Total |           | 49705812 | 250133 | 100.000 | 100.000  |

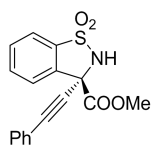

(*R*)-methyl 3-(phenylethynyl)-2,3-dihydrobenzo[*d*]isothiazole-3-carboxylate 1,1-dioxide (**3ba**), 29.4 mg, 90% yield, yellow oil; <sup>1</sup>H NMR (400 MHz, CDCl<sub>3</sub>): δ 7.92 (td, *J* = 7.2, 0.8 Hz, 1H), 7.80-7.78 (m, 1H), 7.34 (td, *J* = 7.6, 1.2 Hz, 1H), 7.65 (td, *J* = 7.6, 0.8 Hz, 1H), 7.45-7.42 (m, 2H), 7.37-7.28 (m, 3H), 5.87 (br, 1H), 3.94 (s, 1H); <sup>13</sup>C NMR (100 MHz, CDCl<sub>3</sub>): δ 167.4, 135.8, 134.2, 134.0, 132.1, 131.1, 129.5, 128.3, 126.2, 121.3, 121.0, 85.7, 84.0, 61.8, 55.0; HRMS (ESI):

calcd for C<sub>17</sub>H<sub>14</sub>NO<sub>4</sub>S [M+H]<sup>+</sup> 328.0644, found 328.0653.

HPLC: Daicel Chiralcel OD-H column (250 mm); detected at 220 nm; hexane/*i*-propanol = 95/05; flow = 0.5 mL/min; Retention time: 42.2 min; 50.7 min (major), 95% *ee*, [ $\alpha$ ]<sub>D</sub><sup>25</sup>: 10.796 (c 0.185, CHCl<sub>3</sub>).

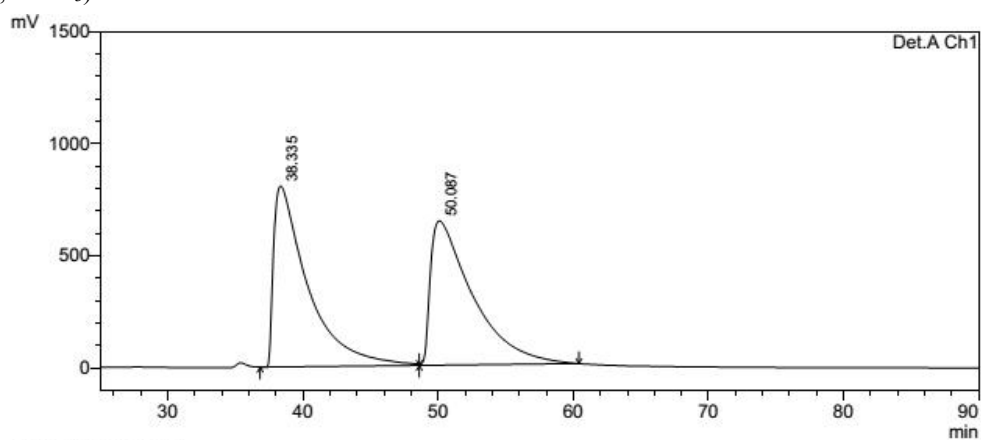

PeakTable

| Peak# | Ret. Time | Area      | Height  | Area %  | Height % |
|-------|-----------|-----------|---------|---------|----------|
| 1     | 38.335    | 142160079 | 806885  | 50.380  | 55.635   |
| 2     | 50.087    | 140015380 | 643446  | 49.620  | 44.365   |
| Total |           | 282175459 | 1450332 | 100.000 | 100.000  |

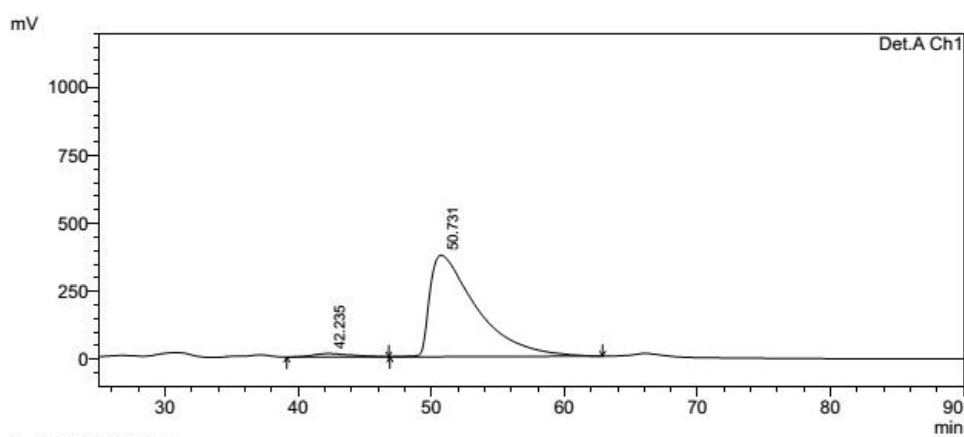

PeakTable

| Peak# | Ret. Time | Area     | Height | Area %  | Height % |
|-------|-----------|----------|--------|---------|----------|
| 1     | 42.235    | 2555627  | 12684  | 2.720   | 3.283    |
| 2     | 50.731    | 91415162 | 373703 | 97.280  | 96.717   |
| Total |           | 93970790 | 386388 | 100.000 | 100.000  |

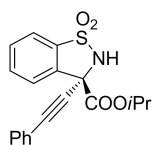

(*R*)-isopropyl 3-(phenylethynyl)-2,3-dihydrobenzo[*d*]isothiazole-3-carboxylate 1,1-dioxide (**3ca**), 27.0 mg, 76% yield, yellow oil; <sup>1</sup>H NMR (400 MHz, CDCl<sub>3</sub>): δ 7.91 (d, *J* = 8.0 Hz, 1H), 7.78 (t, *J* = 7.6 Hz, 1H), 7.71 (td, *J* = 7.6, 1.2 Hz, 1H), 7.63 (td, *J* = 7.6, 1.2 Hz, 1H), 7.43-7.40 (m, 2H), 7.35-7.28 (m, 3H), 5.87 (br, 1H), 5.20-5.14 (m, 1H), 1.40 (d, *J* = 6.0 Hz, 3H), 1.31 (d, *J* = 6.0 Hz, 3H); <sup>13</sup>C NMR (100 MHz, CDCl<sub>3</sub>): δ 166.3, 136.0, 134.3, 133.8, 132.0, 131.0, 129.3, 128.4,

126.0, 121.3, 121.1, 85.3, 84.3, 73.0, 61.9, 21.5, 21.4; HRMS (ESI): calcd for C<sub>19</sub>H<sub>18</sub>NO<sub>4</sub>S [M+H]<sup>+</sup> 356.0957, found 356.0949.

HPLC: Daicel Chiralcel OD-H column (250 mm); detected at 220 nm; hexane/*i*-propanol = 95/05; flow = 0.5 mL/min; Retention time: 22.4 min; 27.2 min (major), 89% *ee*, [ $\alpha$ ]<sub>D</sub><sup>25</sup>: 45.495 (c 0.36, CHCl<sub>3</sub>).

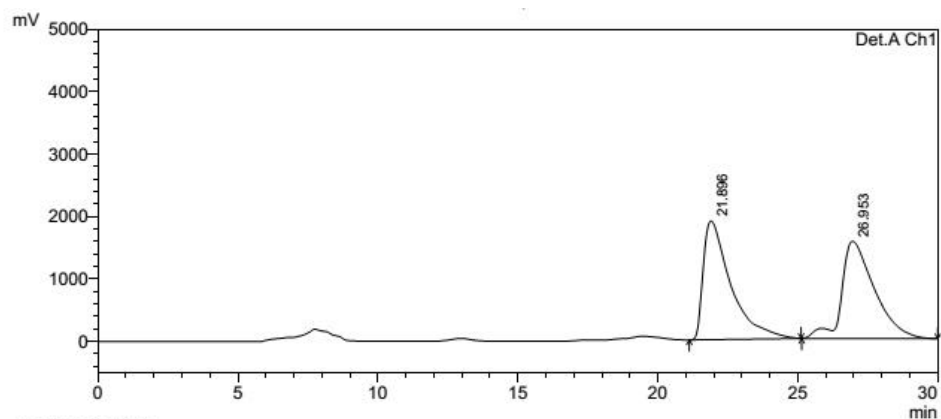

PeakTable

| Peak# | Ret. Time | Area      | Height  | Area %  | Height % |
|-------|-----------|-----------|---------|---------|----------|
| 1     | 21.896    | 130421667 | 1903407 | 50.616  | 54.923   |
| 2     | 26.953    | 127247100 | 1562189 | 49.384  | 45.077   |
| Total |           | 257668767 | 3465596 | 100.000 | 100.000  |

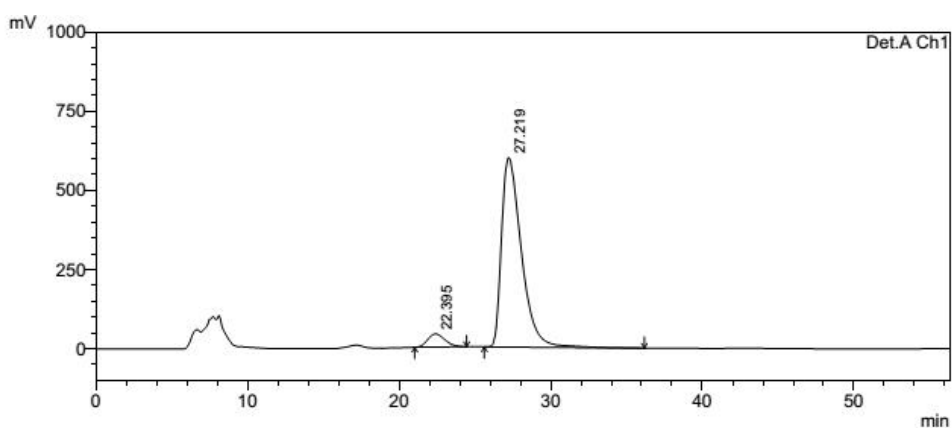

PeakTable

| Peak# | Ret. Time | Area     | Height | Area %  | Height % |
|-------|-----------|----------|--------|---------|----------|
| 1     | 22.395    | 3238140  | 41220  | 5.599   | 6.446    |
| 2     | 27.219    | 54597801 | 598217 | 94.401  | 93.554   |
| Total |           | 57835941 | 639438 | 100.000 | 100.000  |

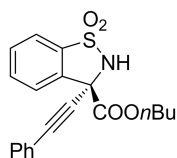

(*R*)-butyl 3-(phenylethynyl)-2,3-dihydrobenzo[*d*]isothiazole-3-carboxylate 1,1-dioxide (**3da**), 29.5 mg, 80% yield, yellow solid, m.p.: 116-118 °C; <sup>1</sup>H NMR (400 MHz, CDCl<sub>3</sub>): δ 7.92(d, *J* = 8.0 Hz, 1H), 7.80(t, *J* = 6.8 Hz, 1H), 7.72 (td, *J* = 7.6, 1.2 Hz, 1H), 7.64 (td, *J* = 7.6, 0.8Hz, 1H), 7.44-7.41 (m, 2H), 7.36-7.28 (m, 3H), 5.87 (br, 1H), 4.41-4.25 (m, 2H), 1.76-1.69 (m, 2H), 1.48-1.38 (m, 2H), 0.94 (t, *J* = 7.2 Hz, 3H); <sup>13</sup>C NMR (100 MHz, CDCl<sub>3</sub>): δ 166.9, 135.8, 134.2,

133.8, 132.0, 131.0, 129.3, 128.3, 126.1, 121.3, 121.0, 85.4, 84.2, 68.3, 61.8, 60.4, 30.3, 19.0, 13.6; HRMS (ESI): calcd for C<sub>20</sub>H<sub>20</sub>NO<sub>4</sub>S [M+H]<sup>+</sup> 370.1113, found 370.1110.

HPLC: Daicel Chiralcel OD-H column (250 mm); detected at 220 nm; hexane/*i*-propanol = 95/05; flow = 0.5 mL/min; Retention time: 25.8 min; 29.9 min (major), 93% *ee*, [ $\alpha$ ]<sub>D</sub><sup>25</sup>: 89.024 (c 0.175, CHCl<sub>3</sub>).

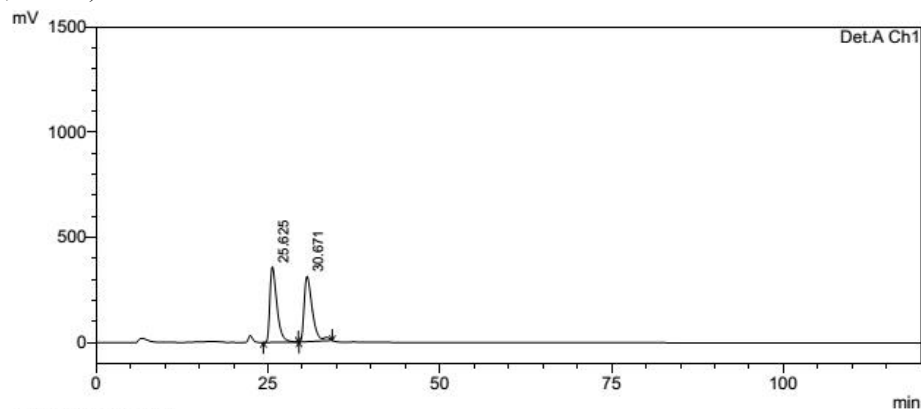

1 Det.A Ch1/220nm

PeakTable

| Peak# | Ret. Time | Area     | Height | Area %  | Height % |
|-------|-----------|----------|--------|---------|----------|
| 1     | 25.625    | 25538102 | 359475 | 50.076  | 53.675   |
| 2     | 30.671    | 25460936 | 310252 | 49.924  | 46.325   |
| Total |           | 50999038 | 669727 | 100.000 | 100.000  |

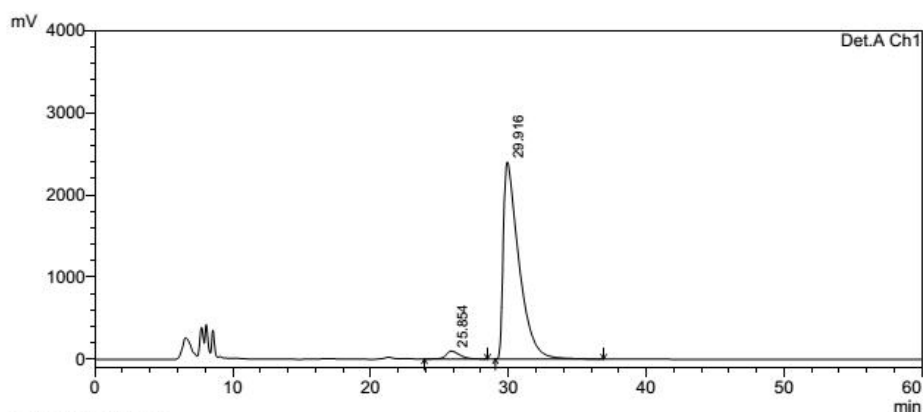

1 Det.A Ch1/220nm

PeakTable

| Peak# | Ret. Time | Area      | Height  | Area %  | Height % |
|-------|-----------|-----------|---------|---------|----------|
| 1     | 25.854    | 6606702   | 95728   | 3.374   | 3.839    |
| 2     | 29.916    | 189223208 | 2397819 | 96.626  | 96.161   |
| Total |           | 195829910 | 2493547 | 100.000 | 100.000  |

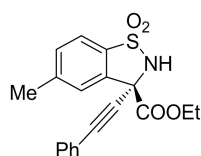

(*R*)-ethyl 5-methyl-3-(phenylethynyl)-2,3-dihydrobenzo[d]isothiazole-3-carboxylate 1,1-dioxide (**3ea**), 27.0 mg, 76% yield, yellow solid, m.p.: 115-117 °C; <sup>1</sup>H NMR (400 MHz, CDCl<sub>3</sub>): δ 7.68-7.65 (m, 2H), 7.46-7.42 (m, 3H), 7.36-7.30 (m, 3H), 5.84 (br, 1H), 4.44-4.35 (m, 2H), 2.51 (s, 3H), 1.37 (t, *J* = 7.2 Hz, 3H); <sup>13</sup>C NMR (100 MHz, CDCl<sub>3</sub>): δ 166.7, 145.2, 136.2, 134.5, 132.1, 131.6, 129.4, 128.4, 126.2, 121.1, 121.0, 85.3, 84.4, 64.5, 61.7, 22.0, 14.0; HRMS (ESI): calcd for

C<sub>19</sub>H<sub>18</sub>NO<sub>4</sub>S [M+H]<sup>+</sup> 356.0957, found 356.0969.

HPLC: Daicel Chiralcel OD-H column (250 mm); detected at 220 nm; hexane/*i*-propanol = 85/15; flow = 0.5 mL/min; Retention time: 26.9 min; 33.6 min (major), 96% *ee*, [ $\alpha$ ]<sub>D</sub><sup>25</sup>: 64.404 (c 0.49, CHCl<sub>3</sub>).

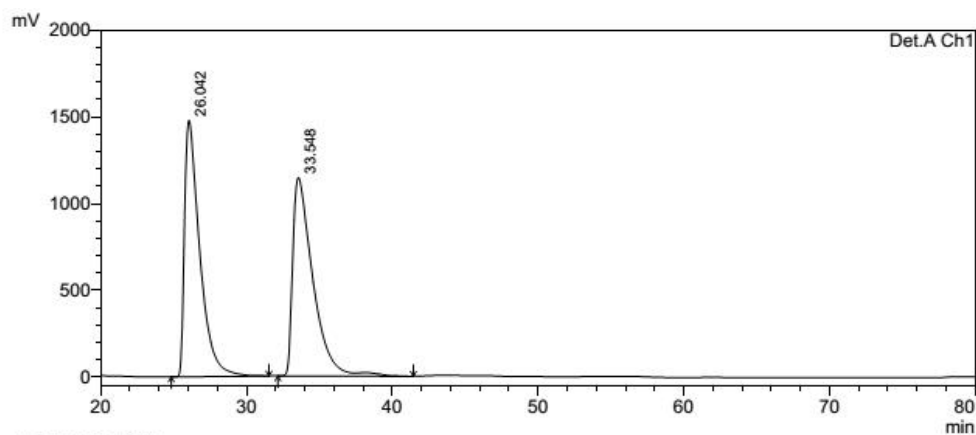

1 Det.A Ch1/220nm

PeakTable

| Peak# | Ret. Time | Area      | Height  | Area %  | Height % |
|-------|-----------|-----------|---------|---------|----------|
| 1     | 26.042    | 107872822 | 1478635 | 49.477  | 56.390   |
| 2     | 33.548    | 110154476 | 1143511 | 50.523  | 43.610   |
| Total |           | 218027298 | 2622146 | 100.000 | 100.000  |

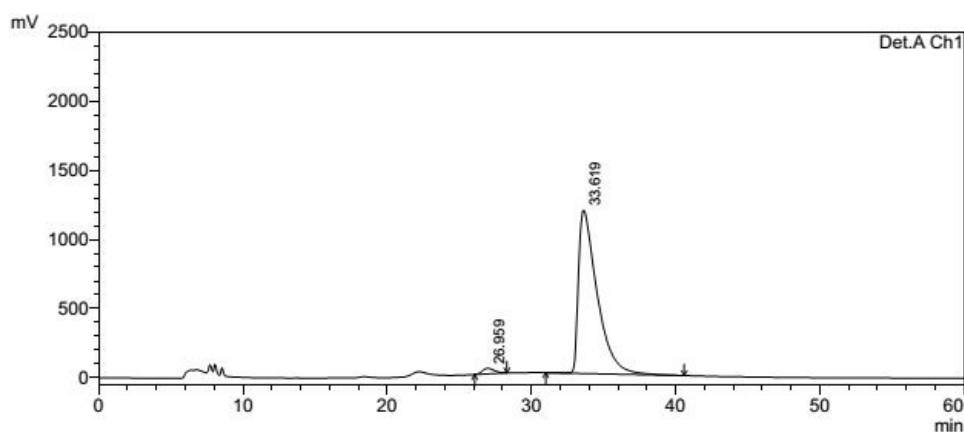

1 Det.A Ch1/220nm

PeakTable

| Peak# | Ret. Time | Area      | Height  | Area %  | Height % |
|-------|-----------|-----------|---------|---------|----------|
| 1     | 26.959    | 2291604   | 39751   | 2.114   | 3.257    |
| 2     | 33.619    | 106133038 | 1180753 | 97.886  | 96.743   |
| Total |           | 108424643 | 1220503 | 100.000 | 100.000  |

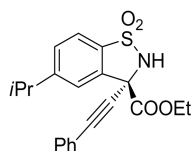

(*R*)-ethyl 5-isopropyl-3-(phenylethynyl)-2,3-dihydrobenzo[d]isothiazole-3-carboxylate 1,1-dioxide (**3fa**), 26.8mg, 70% yield, yellow oil; <sup>1</sup>H NMR (400 MHz, CDCl<sub>3</sub>): δ 7.72 (d, *J* = 1.2 Hz, 1H), 7.69 (d, *J* = 8.0 Hz, 1H), 7.50-7.42 (m, 3H), 7.35-7.28 (m, 3H), 5.82 (br, 1H), 4.41-4.37 (m, 2H), 3.10-3.03 (m, 1H), 1.36 (t, *J* = 7.2 Hz, 3H), 1.30 (d, *J* = 6.8 Hz, 6H); <sup>13</sup>C NMR (100 MHz,



CDCl<sub>3</sub>):  $\delta$  167.0, 156.0, 136.2, 132.0, 131.8, 129.7, 129.3, 128.3, 123.7, 121.2, 121.1, 85.3, 84.5, 64.4, 61.8, 34.5, 23.9, 23.6, 14.0; HRMS (ESI): calcd for C<sub>21</sub>H<sub>22</sub>NO<sub>4</sub>S [M+H]<sup>+</sup> 384.1270, found 384.1254.

HPLC: Daicel Chiralcel OD-H column (250 mm); detected at 220 nm; hexane/*i*-propanol = 85/15; flow = 0.5 mL/min; Retention time: 21.8 min; 26.6 min (major), 95% *ee*, [ $\alpha$ ]<sub>D</sub><sup>25</sup>: 89.024 (c 0.175, CHCl<sub>3</sub>).

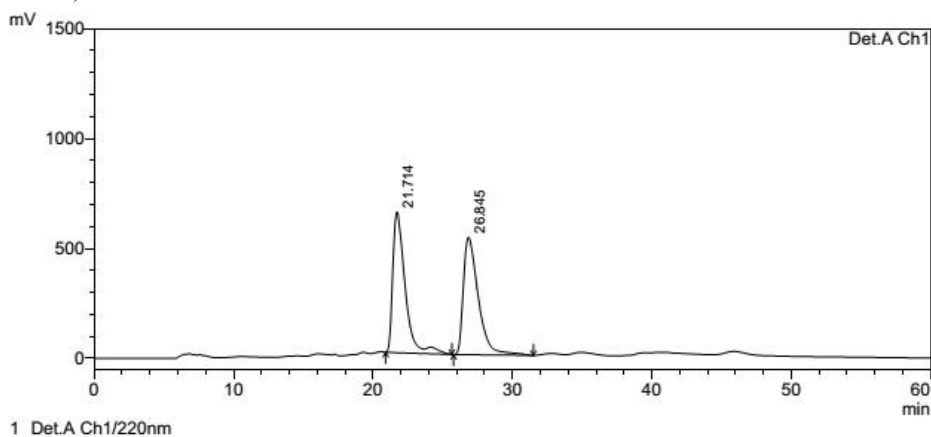

PeakTable

| Peak# | Ret. Time | Area     | Height  | Area %  | Height % |
|-------|-----------|----------|---------|---------|----------|
| 1     | 21.714    | 39686310 | 641003  | 49.932  | 54.534   |
| 2     | 26.845    | 39794964 | 534415  | 50.068  | 45.466   |
| Total |           | 79481274 | 1175418 | 100.000 | 100.000  |

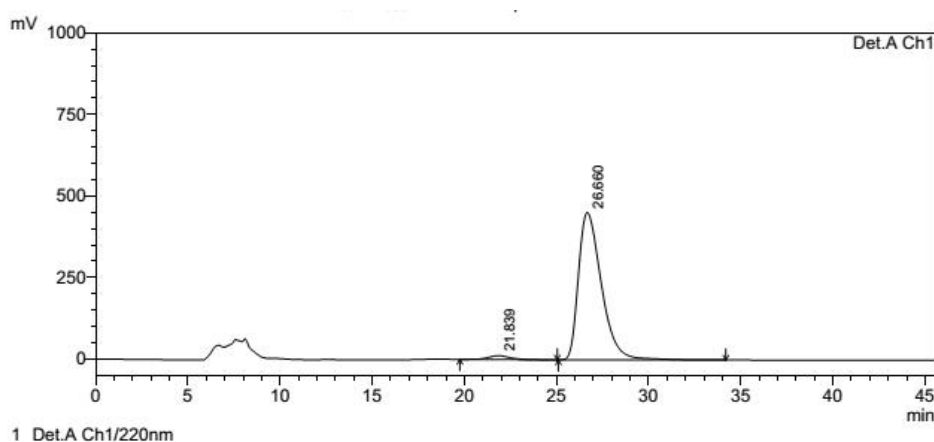

PeakTable

| Peak# | Ret. Time | Area     | Height | Area %  | Height % |
|-------|-----------|----------|--------|---------|----------|
| 1     | 21.839    | 1022784  | 11971  | 2.548   | 2.582    |
| 2     | 26.660    | 39124439 | 451614 | 97.452  | 97.418   |
| Total |           | 40147223 | 463585 | 100.000 | 100.000  |

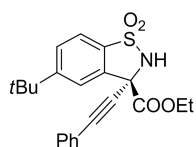

(*R*)-ethyl 5-(*tert*-butyl)-3-(phenylethynyl)-2,3-dihydrobenzo[*d*]isothiazole-3-carboxylate 1,1-dioxide (**3ga**), 22.2 mg, 56% yield, yellow oil; <sup>1</sup>H NMR (400 MHz, CDCl<sub>3</sub>):  $\delta$  7.90(d, *J* = 1.2 Hz, 1H), 7.72-7.65 (m, 2H), 7.45-7.42 (m, 2H), 7.36-7.29 (m, 3H), 5.86 (br, 1H), 4.46-4.33 (m, 2H),

1.38-1.35 (m, 12H);  $^{13}\text{C}$  NMR (100 MHz,  $\text{CDCl}_3$ ):  $\delta$  167.0, 158.3, 136.0, 132.0, 131.4, 129.3, 128.6, 128.3, 122.7, 121.2, 121.9, 85.3, 84.5, 64.3, 61.8, 35.6, 31.2, 14.0; HRMS (ESI): calcd for  $\text{C}_{22}\text{H}_{24}\text{NO}_4\text{S}$   $[\text{M}+\text{H}]^+$  398.1426, found 398.1418.

HPLC: Daicel Chiralcel OD-H column (250 mm); detected at 220 nm; hexane/*i*-propanol = 85/15; flow = 0.5 mL/min; Retention time: 21.8 min; 26.5 min (major), 91% *ee*,  $[\alpha]_D^{25}$ : 52.525 (c 0.27,  $\text{CHCl}_3$ ).

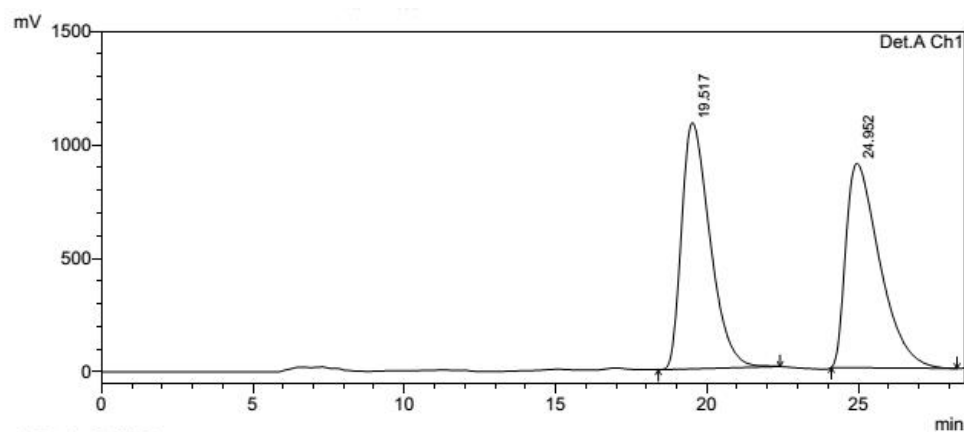

PeakTable

| Peak# | Ret. Time | Area      | Height  | Area %  | Height % |
|-------|-----------|-----------|---------|---------|----------|
| 1     | 19.517    | 70764576  | 1084260 | 50.262  | 54.633   |
| 2     | 24.952    | 70025952  | 900351  | 49.738  | 45.367   |
| Total |           | 140790528 | 1984611 | 100.000 | 100.000  |

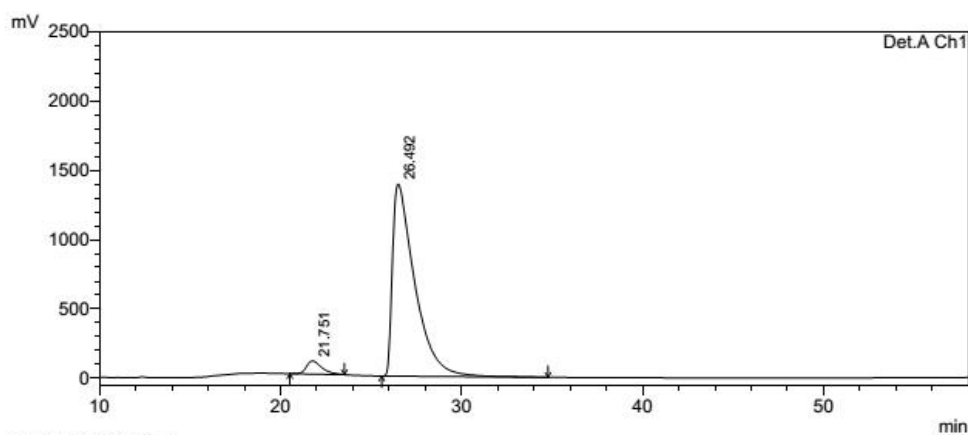

PeakTable

| Peak# | Ret. Time | Area      | Height  | Area %  | Height % |
|-------|-----------|-----------|---------|---------|----------|
| 1     | 21.751    | 5686143   | 94432   | 4.565   | 6.384    |
| 2     | 26.492    | 118881378 | 1384809 | 95.435  | 93.616   |
| Total |           | 124567521 | 1479241 | 100.000 | 100.000  |

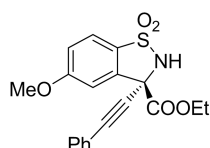

(*R*)-ethyl 5-methoxy-3-(phenylethynyl)-2,3-dihydrobenzo[*d*]isothiazole-3-carboxylate 1,1-dioxide (**3ha**), 26.0 mg, 70% yield;  $^1\text{H}$  NMR (400 MHz,  $\text{CDCl}_3$ ):  $\delta$  7.68 (d,  $J$  = 8.0 Hz, 1H),

7.45-7.42 (m, 2H), 7.35-7.28 (m, 4H), 7.12 (dd,  $J = 8.0, 2.0$  Hz, 1H), 5.85 (br, 1H), 4.42-4.37 (m, 2H), 3.91 (s, 3H), 1.37 (t,  $J = 6.8$  Hz, 3H).<sup>[3]</sup>

HPLC: Daicel Chiralcel OD-H column (250 mm); detected at 220 nm; hexane/*i*-propanol = 85/15; flow = 0.5 mL/min; Retention time: 41.6 min; 48.7 min (major), 93% *ee*,  $[\alpha]^{25}$ : 77.791 (c 0.285, CHCl<sub>3</sub>).

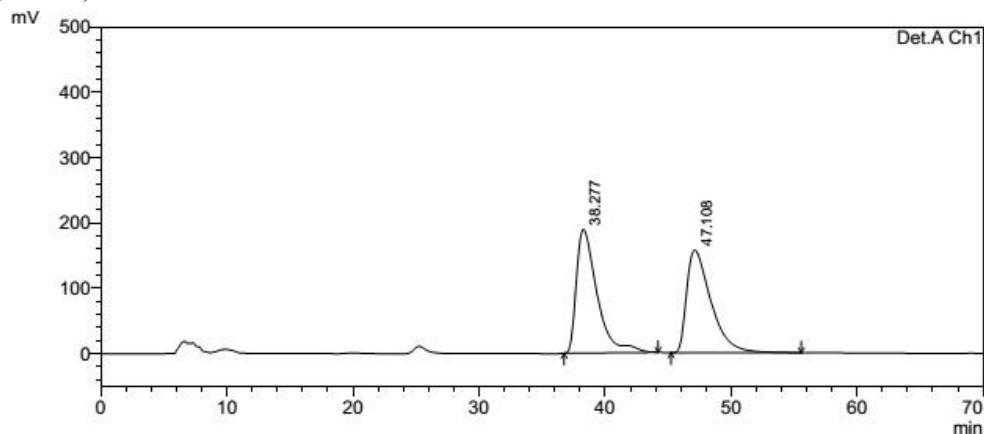

PeakTable

| Peak# | Ret. Time | Area     | Height | Area %  | Height % |
|-------|-----------|----------|--------|---------|----------|
| 1     | 38.277    | 21657255 | 189457 | 50.620  | 54.633   |
| 2     | 47.108    | 21126946 | 157326 | 49.380  | 45.367   |
| Total |           | 42784201 | 346784 | 100.000 | 100.000  |

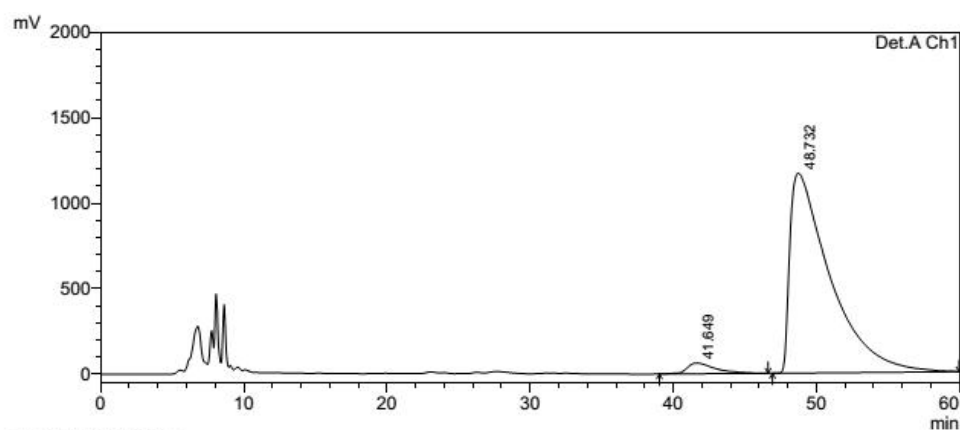

PeakTable

| Peak# | Ret. Time | Area      | Height  | Area %  | Height % |
|-------|-----------|-----------|---------|---------|----------|
| 1     | 41.649    | 8661680   | 62824   | 3.635   | 5.100    |
| 2     | 48.732    | 229609479 | 1168901 | 96.365  | 94.900   |
| Total |           | 238271159 | 1231725 | 100.000 | 100.000  |

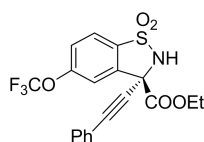

(*R*)-ethyl 3-(phenylethynyl)-5-(trifluoromethoxy)-2,3-dihydrobenzo[*d*]isothiazole-3-carboxylate 1,1-dioxide (**3ia**), 40.3 mg, 95% yield, yellow oil; <sup>1</sup>H NMR (400 MHz, CDCl<sub>3</sub>): δ 7.83 (d,  $J = 8.0$  Hz, 1H), 7.76 (d,  $J = 1.2$  Hz, 1H), 7.50-7.42 (m, 3H), 7.40-7.30 (m, 3H), 5.98 (br, 1H), 4.41 (q,  $J = 6.8$  Hz, 2H), 1.38 (t,  $J = 6.8$  Hz, 3H); <sup>13</sup>C NMR (100 MHz, CDCl<sub>3</sub>): δ 166.2, 153.0 (q,  $J = 1.8$  Hz), 138.6, 132.5, 132.1, 129.6, 128.4, 123.7 (q,  $J = 0.8$  Hz), 123.3, 122.7 (q,  $J = 258.5$  Hz), 120.7,

118.3, 86.1, 83.4, 64.9, 61.3, 13.9; HRMS (ESI): calcd for C<sub>19</sub>H<sub>15</sub>NO<sub>5</sub>SF<sub>3</sub> [M+H]<sup>+</sup> 426.0623, found 426.0637.

HPLC: Daicel Chiralcel OD-H column (250 mm); detected at 220 nm; hexane/*i*-propanol = 85/15; flow = 0.5 mL/min; Retention time: 19.7 min; 25.3 min (major), 90% *ee*, [ $\alpha$ ]<sup>25</sup>: 57.399 (c 0.515, CHCl<sub>3</sub>).

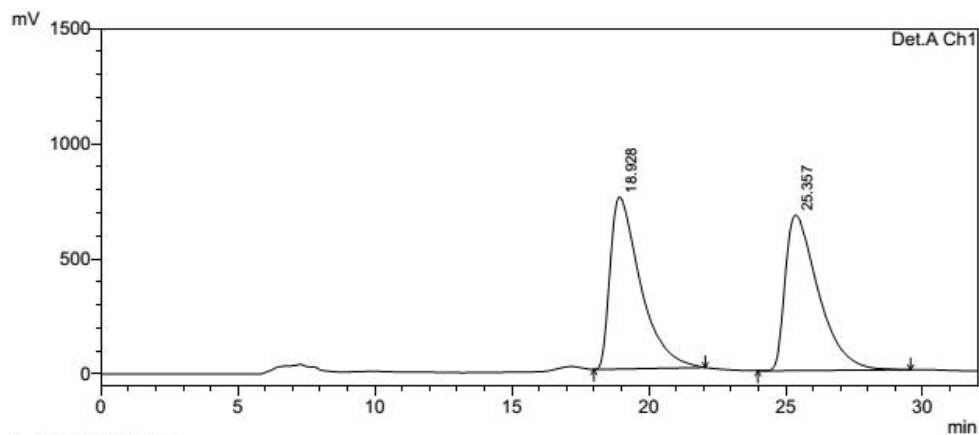

PeakTable

| Peak# | Ret. Time | Area      | Height  | Area %  | Height % |
|-------|-----------|-----------|---------|---------|----------|
| 1     | 18.928    | 57529790  | 747728  | 50.333  | 52.546   |
| 2     | 25.357    | 56769426  | 675277  | 49.667  | 47.454   |
| Total |           | 114299216 | 1423005 | 100.000 | 100.000  |

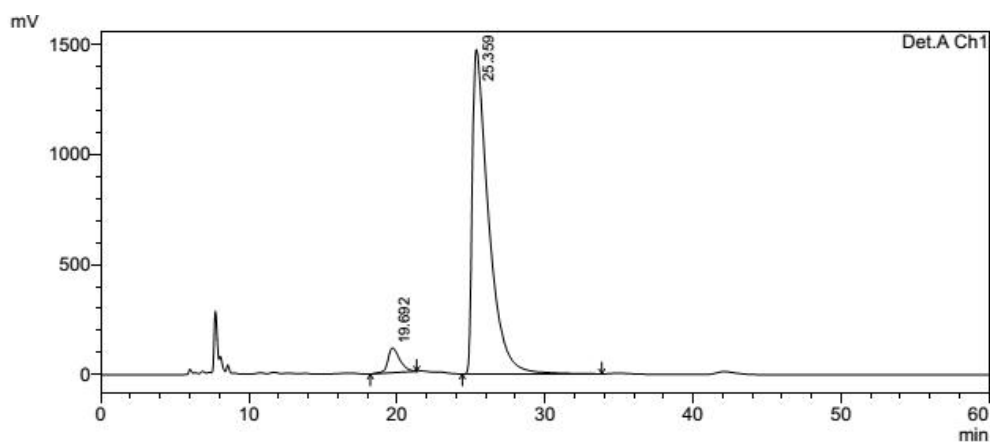

PeakTable

| Peak# | Ret. Time | Area      | Height  | Area %  | Height % |
|-------|-----------|-----------|---------|---------|----------|
| 1     | 19.692    | 6253780   | 112677  | 5.239   | 7.092    |
| 2     | 25.359    | 113121966 | 1476209 | 94.761  | 92.908   |
| Total |           | 119375746 | 1588886 | 100.000 | 100.000  |

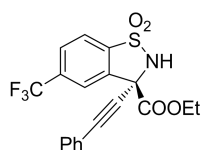

(*R*)-ethyl 3-(phenylethynyl)-5-(trifluoromethyl)-2,3-dihydrobenzo[*d*]isothiazole-3-carboxylate 1,1-dioxide (**3ja**), 39.7 mg, 97% yield, yellow oil; <sup>1</sup>H NMR (400 MHz, CDCl<sub>3</sub>):  $\delta$  8.19 (d, *J* =

0.8 Hz, 1H), 7.92-7.91 (m, 2H), 7.46-7.43 (m, 2H), 7.39-7.30 (m, 3H), 6.00 (br, 1H), 4.43 (q,  $J = 6.8$  Hz, 2H), 1.39 (t,  $J = 7.2$  Hz, 3H);  $^{13}\text{C}$  NMR (100 MHz,  $\text{CDCl}_3$ ):  $\delta$  166.1, 137.6, 137.0, 136.0 (q,  $J = 33.4$  Hz), 132.1, 129.7, 128.4, 128.3 (q,  $J = 3.5$  Hz), 125.6 (q,  $J = 271.9$  Hz), 123.7 (q,  $J = 4.0$  Hz), 122.2, 120.6, 86.3, 83.2, 64.9, 61.6, 13.9; HRMS (ESI): calcd for  $\text{C}_{19}\text{H}_{15}\text{NO}_4\text{SF}_3$   $[\text{M}+\text{H}]^+$  410.0674, found 410.0666.

HPLC: Daicel Chiralcel OD-H column (250 mm); detected at 220 nm; hexane/*i*-propanol = 85/15; flow = 0.5 mL/min; Retention time: 21.7 min; 27.9 min (major), 92% *ee*,  $[\alpha]^{25}$ : 46.049 (c 0.36,  $\text{CHCl}_3$ ).

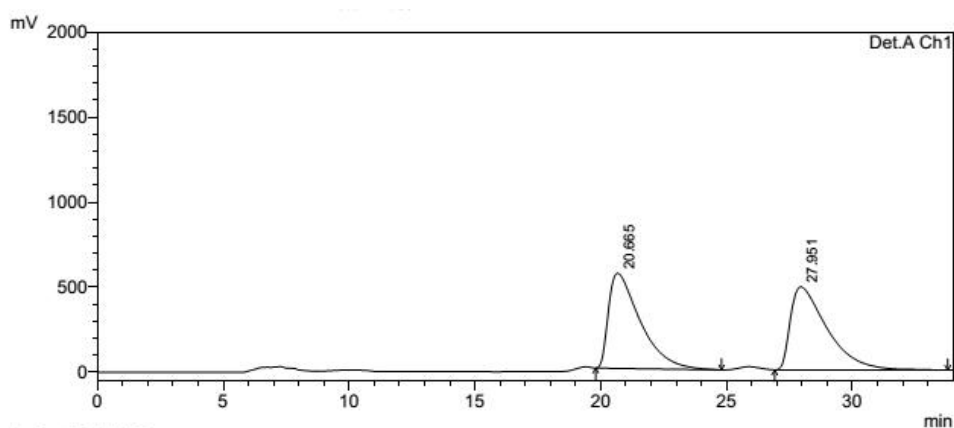

PeakTable

Detector A Ch1 220nm

| Peak# | Ret. Time | Area     | Height  | Area %  | Height % |
|-------|-----------|----------|---------|---------|----------|
| 1     | 20.665    | 49297586 | 560434  | 49.750  | 53.400   |
| 2     | 27.951    | 49792877 | 489076  | 50.250  | 46.600   |
| Total |           | 99090463 | 1049511 | 100.000 | 100.000  |

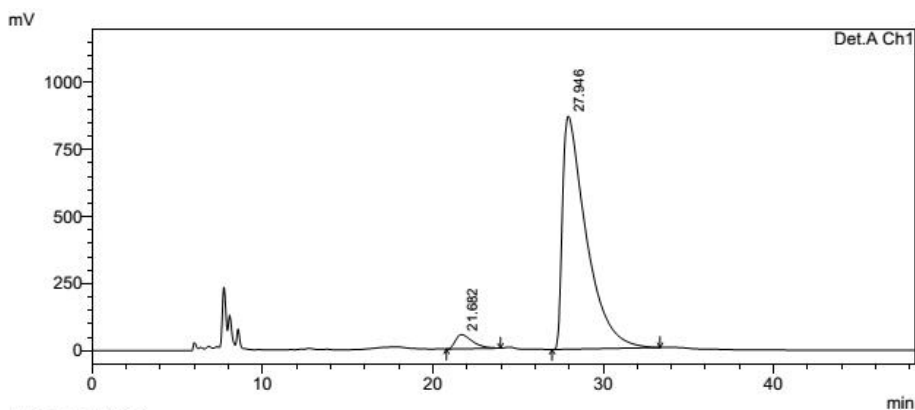

PeakTable

Detector A Ch1 220nm

| Peak# | Ret. Time | Area     | Height | Area %  | Height % |
|-------|-----------|----------|--------|---------|----------|
| 1     | 21.682    | 3671742  | 52780  | 4.174   | 5.724    |
| 2     | 27.946    | 84291022 | 869259 | 95.826  | 94.276   |
| Total |           | 87962764 | 922040 | 100.000 | 100.000  |

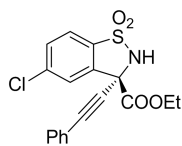

(*R*)-ethyl 5-chloro-3-(phenylethynyl)-2,3-dihydrobenzo[d]isothiazole-3-carboxylate 1,1-dio-

xide (**3ka**), 35.2 mg, 94% yield;  $^1\text{H NMR}$  (400 MHz,  $\text{CDCl}_3$ ):  $\delta$  7.89 (d,  $J=1.6$  Hz, 1H), 7.72 (d,  $J=8.0$  Hz, 1H), 7.61 (dd,  $J=8.0, 2.0$  Hz, 1H), 7.46-7.44 (m, 2H), 7.37-7.30 (m, 3H), 5.89 (br, 1H), 4.47-4.37 (m, 2H), 1.39 (t,  $J=7.2$  Hz, 3H).<sup>[3]</sup>

HPLC: Daicel Chiralcel OD-H column (250 mm); detected at 220 nm; hexane/*i*-propanol = 85/15; flow = 0.5 mL/min; Retention time: 25.9 min; 35.5 min (major), 90% *ee*,  $[\alpha]_D^{25}$ : 67.909 (c 0.20,  $\text{CHCl}_3$ ).

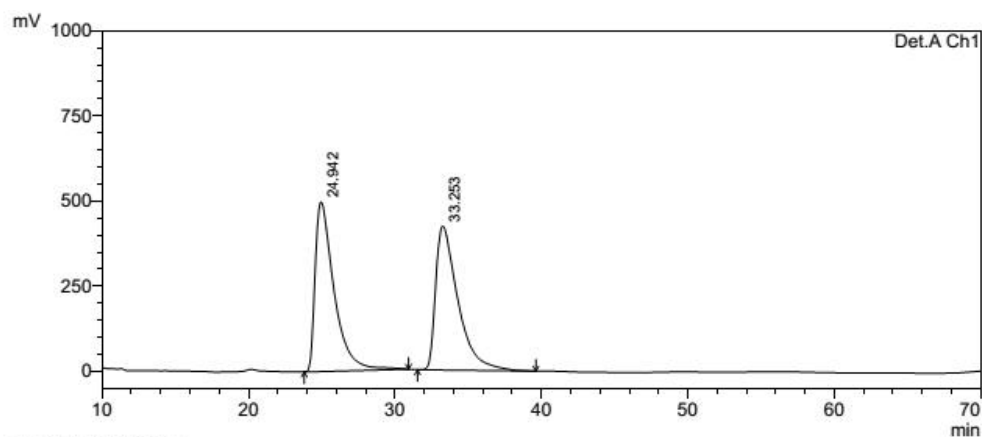

1 Det.A Ch1/220nm

PeakTable

| Peak# | Ret. Time | Area     | Height | Area %  | Height % |
|-------|-----------|----------|--------|---------|----------|
| 1     | 24.942    | 44843952 | 497635 | 50.108  | 54.080   |
| 2     | 33.253    | 44650592 | 422554 | 49.892  | 45.920   |
| Total |           | 89494543 | 920188 | 100.000 | 100.000  |

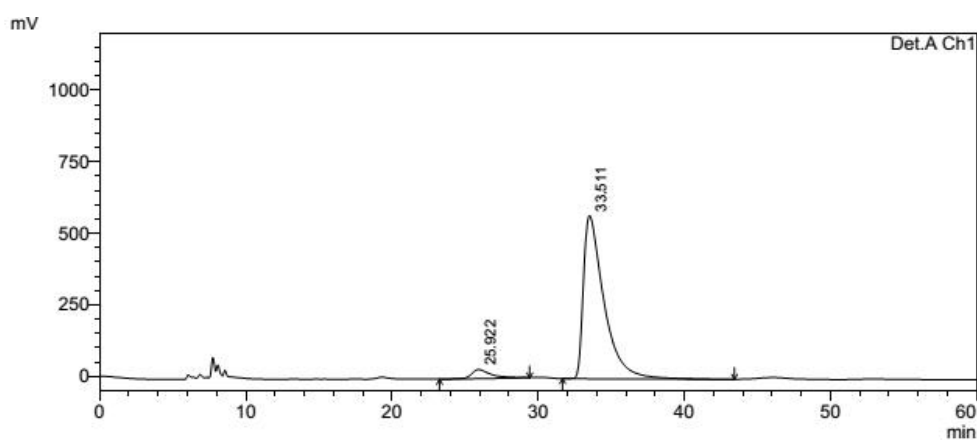

1 Det.A Ch1/220nm

PeakTable

| Peak# | Ret. Time | Area     | Height | Area %  | Height % |
|-------|-----------|----------|--------|---------|----------|
| 1     | 25.922    | 3012368  | 31682  | 5.114   | 5.270    |
| 2     | 33.511    | 55890155 | 569452 | 94.886  | 94.730   |
| Total |           | 58902523 | 601134 | 100.000 | 100.000  |

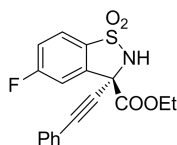

(*R*)-ethyl 5-fluoro-3-(phenylethynyl)-2,3-dihydrobenzo[d]isothiazole-3-carboxylate 1,1-dioxide (**3la**), 33.3 mg, 93% yield, yellow solid, m.p.: 93-94 °C;  $^1\text{H NMR}$  (400 MHz,  $\text{CDCl}_3$ ):  $\delta$  7.90 (dd,  $J=8.0, 4.8$  Hz, 1H), 7.59 (dd,  $J=8.0, 2.0$  Hz, 1H), 7.45-7.43 (m, 2H), 7.37-7.29 (m, 4H), 5.93

(br, 1H), 4.48-4.36 (m, 2H), 1.39 (t,  $J = 7.2$  Hz, 3H);  $^{13}\text{C}$  NMR (100 MHz,  $\text{CDCl}_3$ ):  $\delta$  166.3, 165.8 (d,  $J = 254.9$  Hz), 139.1 (d,  $J = 9.4$  Hz), 132.0, 130.4 (d,  $J = 2.9$  Hz), 129.6, 128.4, 123.6 (d,  $J = 9.8$  Hz), 120.8, 119.2 (d,  $J = 24.0$  Hz), 113.4, 85.9, 83.5, 64.8, 61.2, 14.0; HRMS (ESI): calcd for  $\text{C}_{18}\text{H}_{15}\text{NO}_4\text{SF}$   $[\text{M}+\text{H}]^+$  360.0706, found 360.0720.

HPLC: Daicel Chiralcel OD-H column (250 mm); detected at 220 nm; hexane/*i*-propanol = 85/15; flow = 0.5 mL/min; Retention time: 25.5 min; 34.8 min (major), 91% *ee*,  $[\alpha]^{25}$ : 47.583 (c 0.34,  $\text{CHCl}_3$ ).

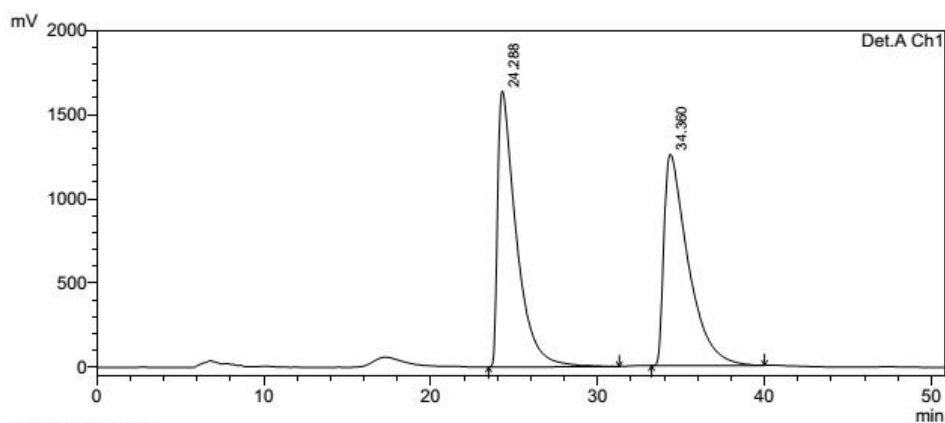

PeakTable

Detector A Ch1 220nm

| Peak# | Ret. Time | Area      | Height  | Area %  | Height % |
|-------|-----------|-----------|---------|---------|----------|
| 1     | 24.288    | 127913884 | 1638568 | 50.211  | 56.608   |
| 2     | 34.360    | 126838385 | 1256003 | 49.789  | 43.392   |
| Total |           | 254752269 | 2894572 | 100.000 | 100.000  |

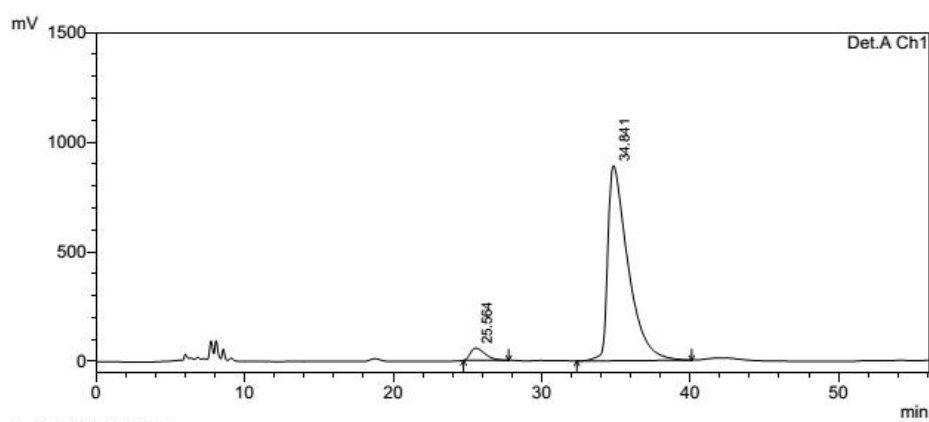

PeakTable

Detector A Ch1 220nm

| Peak# | Ret. Time | Area     | Height | Area %  | Height % |
|-------|-----------|----------|--------|---------|----------|
| 1     | 25.564    | 3863013  | 55866  | 4.360   | 5.906    |
| 2     | 34.841    | 84734141 | 890129 | 95.640  | 94.094   |
| Total |           | 88597153 | 945995 | 100.000 | 100.000  |

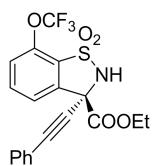

(*R*)-ethyl 3-(phenylethynyl)-7-(trifluoromethoxy)-2,3-dihydrobenzo[d]isothiazole-3-carboxylate **(3ma)**, 34.8 mg, 82% yield, yellow oil;  $^1\text{H}$  NMR (400 MHz,  $\text{CDCl}_3$ ):  $\delta$  7.82 (d,  $J$

=7.6 Hz, 1H), 7.75 (t,  $J$  =8.0Hz, 1H), 7.46-7.29 (m, 3H), 7.39-7.29 (m, 3H), 5.98 (br, 1H), 4.46-4.37 (m, 2H), 1.39 (t,  $J$  = 7.2 Hz, 3H);  $^{13}\text{C}$  NMR (100 MHz,  $\text{CDCl}_3$ ):  $\delta$  166.3, 143.5 (q,  $J$  =2.0 Hz), 139.2, 135.7, 132.0, 129.5, 128.3, 126.4, 123.6, 123.1 (q,  $J$  =283.4 Hz), 120.8, 120.7 (q,  $J$  =1.7 Hz), 86.0, 83.5, 64.8, 61.2, 14.0; HRMS (ESI): calcd for  $\text{C}_{19}\text{H}_{15}\text{NO}_5\text{SF}_3$   $[\text{M}+\text{H}]^+$  426.0623, found 426.0631.

HPLC: Daicel Chiralcel OD-H column (250 mm); detected at 220 nm; hexane/*i*-propanol = 95/05; flow = 0.5 mL/min; Retention time: 51.2 min; 57.9 min (major), 94% *ee*,  $[\alpha]^{25}$ : 17.669 (c 0.26,  $\text{CHCl}_3$ ).

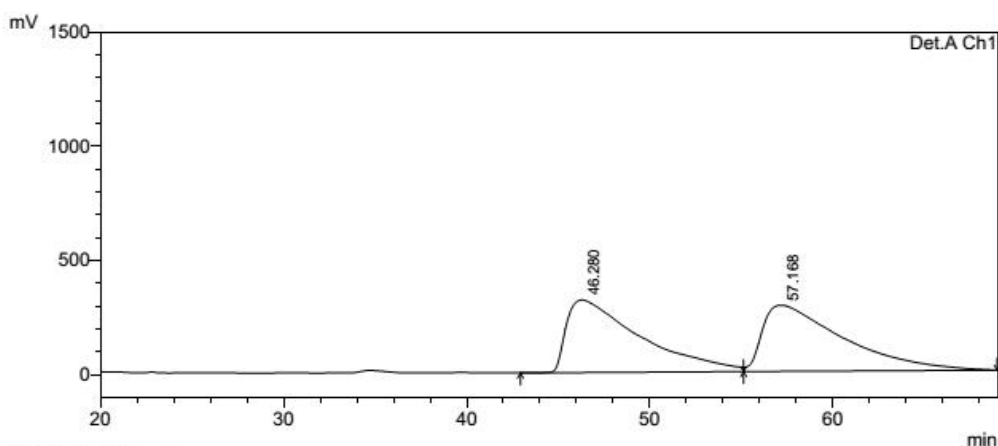

PeakTable

Detector A Ch1 220nm

| Peak# | Ret. Time | Area      | Height | Area %  | Height % |
|-------|-----------|-----------|--------|---------|----------|
| 1     | 46.280    | 89002608  | 318532 | 50.022  | 52.334   |
| 2     | 57.168    | 88922727  | 290123 | 49.978  | 47.666   |
| Total |           | 177925335 | 608654 | 100.000 | 100.000  |

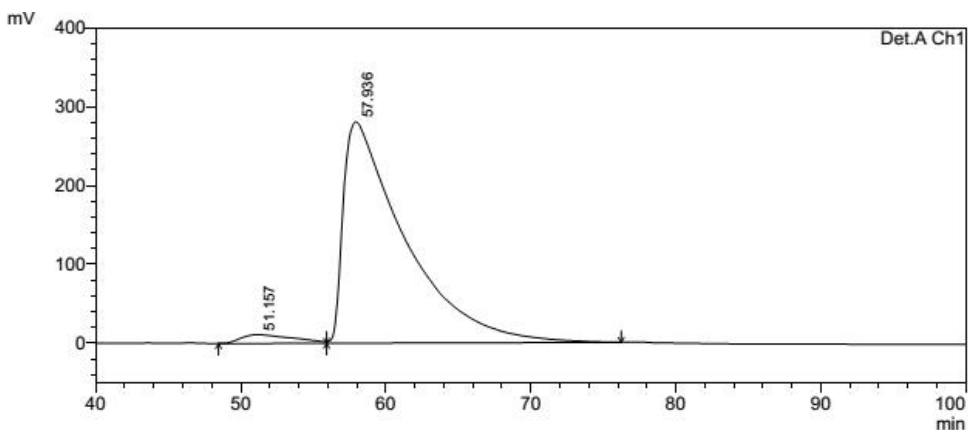

PeakTable

Detector A Ch1 220nm

| Peak# | Ret. Time | Area     | Height | Area %  | Height % |
|-------|-----------|----------|--------|---------|----------|
| 1     | 51.157    | 2806926  | 11233  | 3.260   | 3.846    |
| 2     | 57.936    | 83294769 | 280817 | 96.740  | 96.154   |
| Total |           | 86101695 | 292050 | 100.000 | 100.000  |

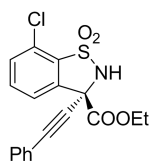

(*R*)-ethyl 7-chloro-3-(phenylethynyl)-2,3-dihydrobenzo[*d*]isothiazole-3-carboxylate 1,1-dioxide (**3na**), 30.0 mg, 80% yield, yellow solid, m.p.: 96-97 °C;  $^1\text{H}$  NMR (400 MHz,  $\text{CDCl}_3$ ):  $\delta$  7.82



(dd,  $J = 8.0, 0.8$  Hz, 1H), 7.64 (t,  $J = 8.0$  Hz, 1H), 7.56 (dd,  $J = 8.0, 0.8$  Hz, 1H), 7.44-7.41 (m, 2H), 7.38-7.28 (m, 3H), 6.00 (br, 1H), 4.46-4.34 (m, 2H), 1.38 (t,  $J = 7.2$  Hz, 3H);  $^{13}\text{C}$  NMR (100 MHz,  $\text{CDCl}_3$ ):  $\delta$  166.4, 138.6, 134.9, 132.4, 132.0, 131.8, 129.5, 128.9, 128.3, 124.3, 120.8, 85.8, 83.7, 64.8, 60.7, 13.9; HRMS (ESI): calcd for  $\text{C}_{18}\text{H}_{15}\text{NO}_4\text{S}$   $[\text{M}+\text{H}]^+$  376.0410, found 376.0421.

HPLC: Daicel Chiralcel OD-H column (250 mm); detected at 220 nm; hexane/*i*-propanol = 95/05; flow = 0.5 mL/min; Retention time: 37.0 min; 41.3 min (major), 94% *ee*,  $[\alpha]^{25}$ : -5.463 (c 0.585,  $\text{CHCl}_3$ ).

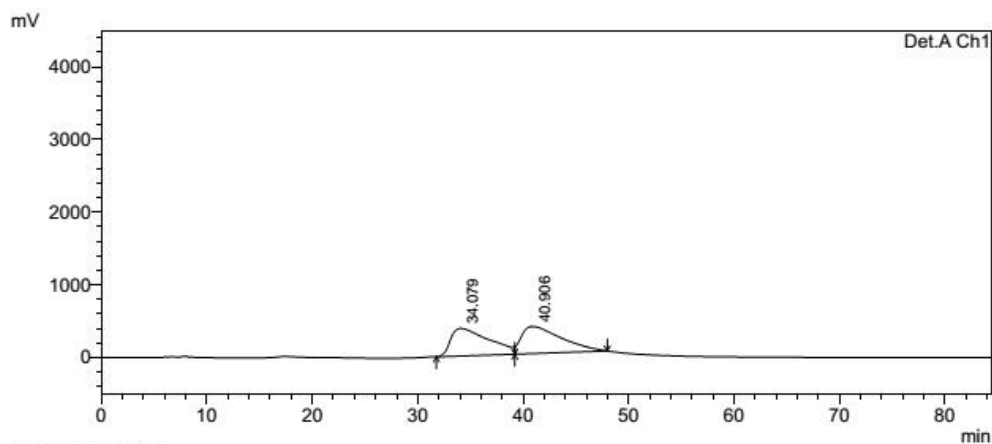

1 Det.A Ch1/220nm

PeakTable

Detector A Ch1 220nm

| Peak# | Ret. Time | Area      | Height | Area %  | Height % |
|-------|-----------|-----------|--------|---------|----------|
| 1     | 34.079    | 95113709  | 380559 | 49.221  | 50.518   |
| 2     | 40.906    | 98125903  | 372752 | 50.779  | 49.482   |
| Total |           | 193239612 | 753311 | 100.000 | 100.000  |

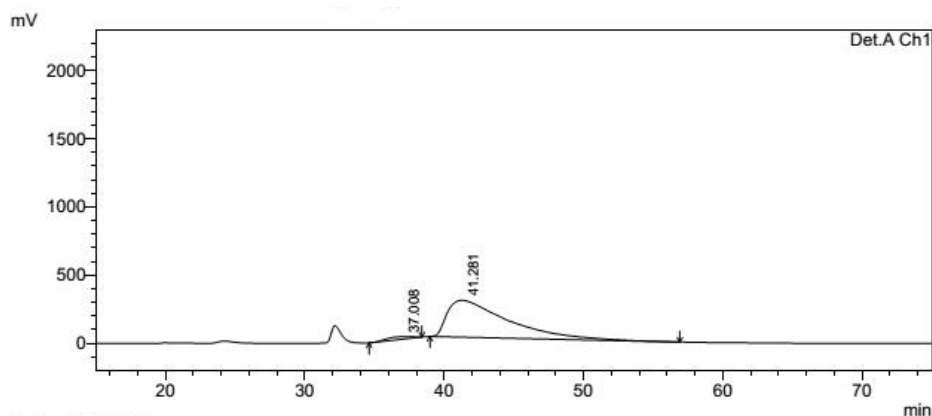

1 Det.A Ch1/220nm

PeakTable

Detector A Ch1 220nm

| Peak# | Ret. Time | Area     | Height | Area %  | Height % |
|-------|-----------|----------|--------|---------|----------|
| 1     | 37.008    | 2517086  | 18801  | 2.969   | 6.495    |
| 2     | 41.281    | 82247924 | 270679 | 97.031  | 93.505   |
| Total |           | 84765009 | 289480 | 100.000 | 100.000  |

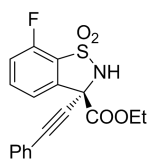

(*R*)-ethyl 7-fluoro-3-(phenylethynyl)-2,3-dihydrobenzo[d]isothiazole-3-carboxylate 1,1-dio-

xide (**30a**), 27.3 mg, 76% yield, yellow solid, m.p.: 70-72 °C; <sup>1</sup>H NMR (400 MHz, CDCl<sub>3</sub>): δ 7.72-7.69 (m, 2H), 7.44-7.42 (m, 2H), 7.38-7.26 (m, 4H), 6.00 (br, 1H), 4.47-4.35 (m, 2H), 1.38 (t, *J* = 7.2 Hz, 3H); <sup>13</sup>C NMR (100 MHz, CDCl<sub>3</sub>): δ 166.4, 156.0 (d, *J* = 258.5 Hz), 139.2, 136.3 (d, *J* = 7.0 Hz), 132.0, 129.5, 128.4, 122.7 (d, *J* = 20.1 Hz), 121.6 (d, *J* = 4.2 Hz), 120.9, 117.9 (d, *J* = 18.3 Hz), 85.9, 83.6, 64.8, 61.6, 13.9; HRMS (ESI): calcd for C<sub>18</sub>H<sub>15</sub>NO<sub>4</sub>SF [M+H]<sup>+</sup> 360.0706, found 360.0719.

HPLC: Daicel Chiralcel OD-H column (250 mm); detected at 220 nm; hexane/*i*-propanol = 95/05; flow = 0.5 mL/min; Retention time: 36.1 min; 43.7 min (major), 98% *ee*, [ $\alpha$ ]<sub>D</sub><sup>25</sup>: 41.373 (c 0.42, CHCl<sub>3</sub>).

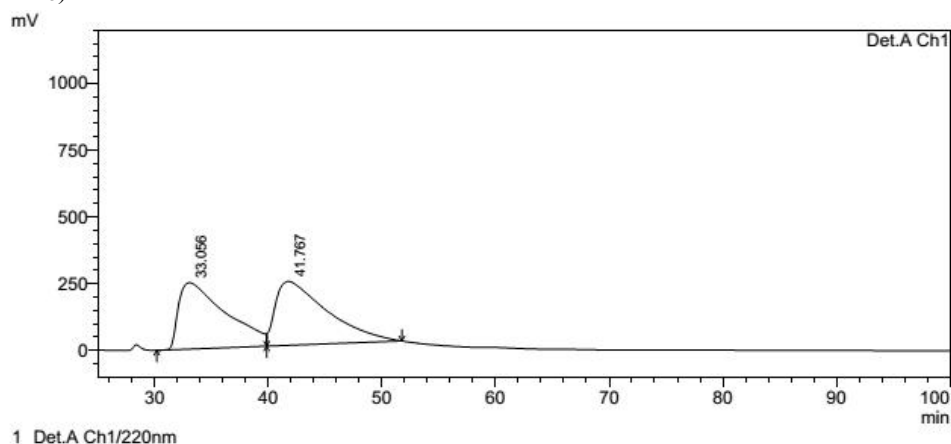

PeakTable

| Peak# | Ret. Time | Area      | Height | Area %  | Height % |
|-------|-----------|-----------|--------|---------|----------|
| 1     | 33.056    | 71319637  | 248706 | 48.449  | 50.935   |
| 2     | 41.767    | 75887272  | 239575 | 51.551  | 49.065   |
| Total |           | 147206909 | 488281 | 100.000 | 100.000  |

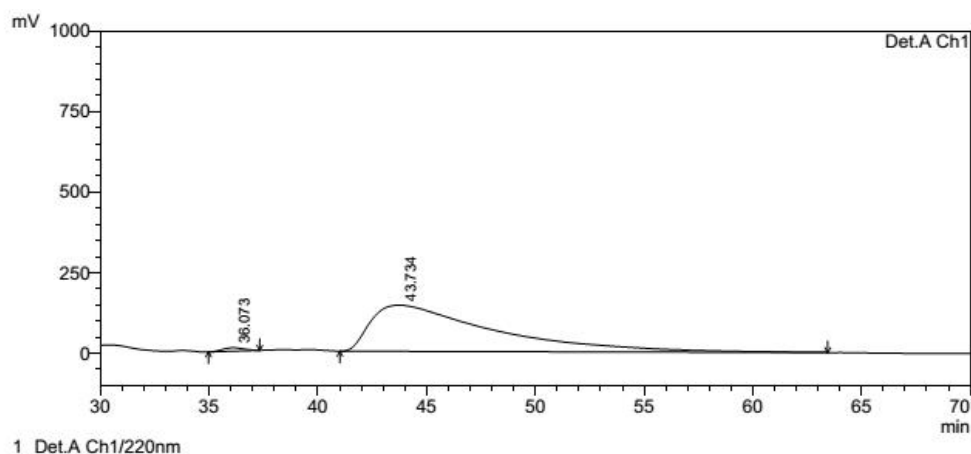

PeakTable

| Peak# | Ret. Time | Area     | Height | Area %  | Height % |
|-------|-----------|----------|--------|---------|----------|
| 1     | 36.073    | 710787   | 10697  | 1.244   | 6.940    |
| 2     | 43.734    | 56449347 | 143445 | 98.756  | 93.060   |
| Total |           | 57160133 | 154142 | 100.000 | 100.000  |

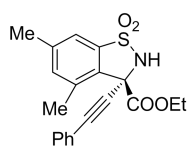

(*R*)-ethyl 4,6-dimethyl-3-(phenylethynyl)-2,3-dihydrobenzo[*d*]isothiazole-3-carboxylate 1,1-dioxide (**3pa**), 22.8 mg, 62% yield, yellow solid, m.p.: 112-114 °C; <sup>1</sup>H NMR (400 MHz, CDCl<sub>3</sub>): δ 7.45-7.42 (m, 3H), 7.38-7.29 (m, 4H), 5.44 (br, 1H), 4.33-4.27 (m, 2H), 2.56 (s, 3H), 2.43 (s, 3H), 1.30 (t, *J* = 7.2 Hz, 3H); <sup>13</sup>C NMR (100 MHz, CDCl<sub>3</sub>): δ 166.7, 141.7, 137.2, 136.4, 134.4, 131.9, 130.5, 129.4, 128.4, 121.0, 119.2, 87.4, 82.8, 63.9, 62.0, 21.1, 18.8, 13.9; HRMS (ESI): calcd for C<sub>20</sub>H<sub>20</sub>NO<sub>4</sub>S [M+H]<sup>+</sup> 370.1113, found 370.1110.

HPLC: Daicel Chiralcel OD-H column (250 mm); detected at 220 nm; hexane/*i*-propanol = 95/05; flow = 0.5 mL/min; Retention time: 28.2 min; 31.2 min (major), 40% *ee*, [ $\alpha$ ]<sub>D</sub><sup>25</sup>: 10.241 (c 0.55, CHCl<sub>3</sub>).

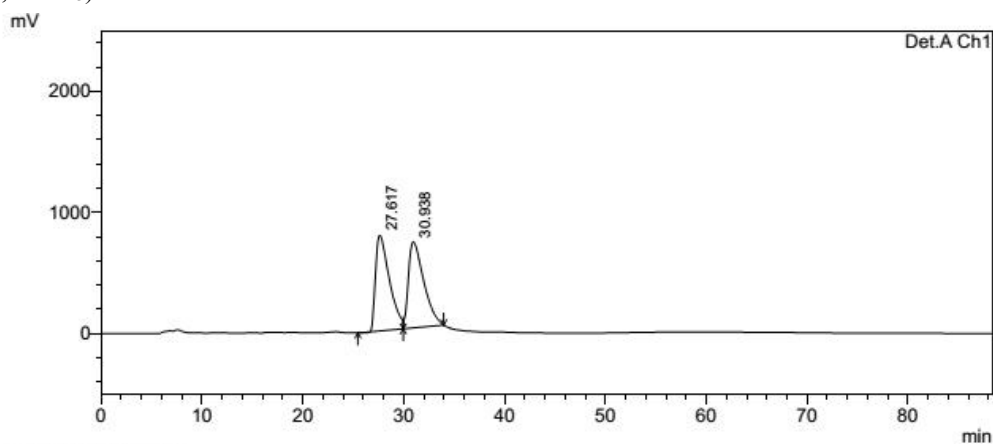

PeakTable

| Peak# | Ret. Time | Area      | Height  | Area %  | Height % |
|-------|-----------|-----------|---------|---------|----------|
| 1     | 27.617    | 75344749  | 789772  | 49.946  | 52.649   |
| 2     | 30.938    | 75508941  | 710301  | 50.054  | 47.351   |
| Total |           | 150853691 | 1500073 | 100.000 | 100.000  |

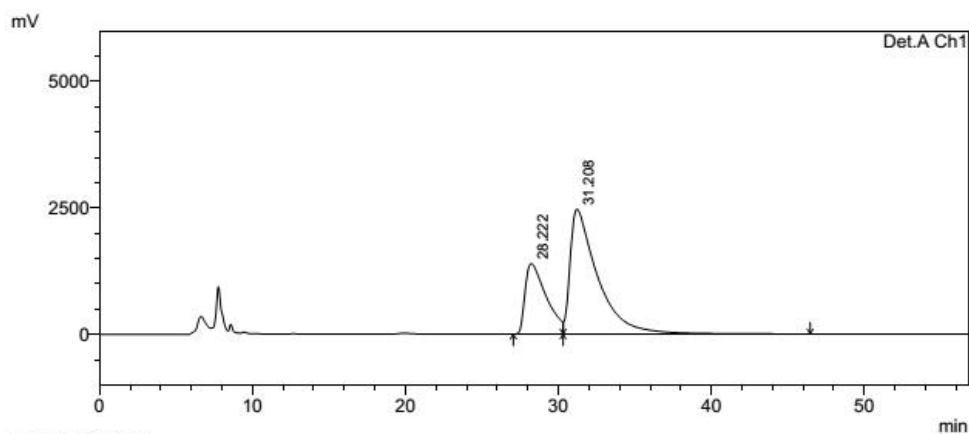

PeakTable

| Peak# | Ret. Time | Area      | Height  | Area %  | Height % |
|-------|-----------|-----------|---------|---------|----------|
| 1     | 28.222    | 132624662 | 1394083 | 29.943  | 36.080   |
| 2     | 31.208    | 310294413 | 2469833 | 70.057  | 63.920   |
| Total |           | 442919075 | 3863915 | 100.000 | 100.000  |

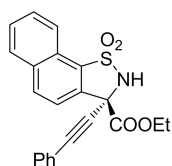

(*R*)-ethyl 3-(phenylethynyl)-2,3-dihydro-naphtho[2,1-*d*]isothiazole-3-carboxylate 1,1-dioxide (**3qa**), 34.0 mg, 87% yield, yellow solid, m.p.: 116-118 °C; <sup>1</sup>H NMR (400 MHz, CDCl<sub>3</sub>): δ 8.41 (d, *J* = 8.0 Hz, 1H), 8.16 (d, *J* = 8.0 Hz, 1H), 7.99 (d, *J* = 8.0 Hz, 1H), 7.91 (d, *J* = 8.0 Hz, 1H), 7.77-7.67 (m, 2H), 7.45-7.43 (m, 2H), 7.35-7.28 (m, 3H), 6.00 (br, 1H), 4.45-4.36 (m, 2H), 1.38 (t, *J* = 7.2 Hz, 3H); <sup>13</sup>C NMR (100 MHz, CDCl<sub>3</sub>): δ 166.9, 135.0, 134.8, 134.1, 132.0, 129.7, 129.5, 129.4, 128.64, 128.63, 128.4, 125.0, 123.3, 121.4, 121.1, 85.8, 84.1, 64.6, 61.9, 14.0; HRMS (ESI): calcd for C<sub>22</sub>H<sub>18</sub>NO<sub>4</sub>S [M+H]<sup>+</sup> 392.0957, found 392.0949.

HPLC: Daicel Chiralcel OD-H column (250 mm); detected at 220 nm; hexane/*i*-propanol = 95/05; flow = 0.5 mL/min; Retention time: 33.1 min; 42.4 min (major), 91% *ee*, [α]<sub>D</sub><sup>25</sup>: -26.631 (c 0.285, CHCl<sub>3</sub>).

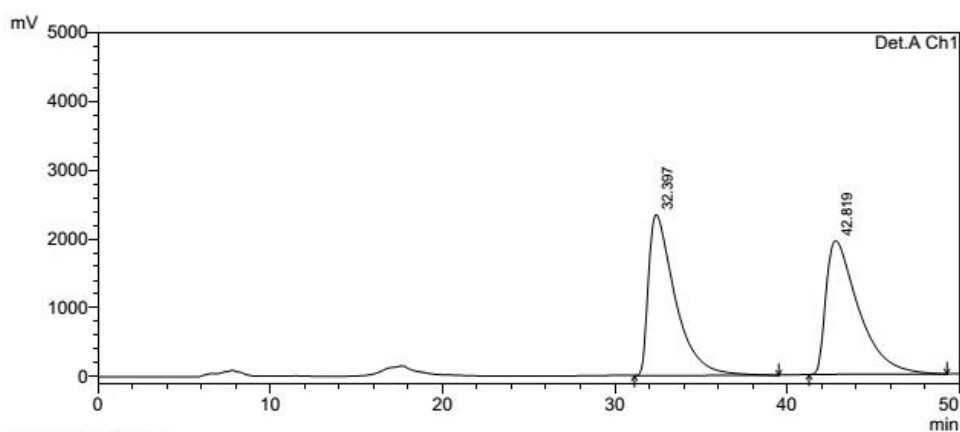

PeakTable

| Peak# | Ret. Time | Area      | Height  | Area %  | Height % |
|-------|-----------|-----------|---------|---------|----------|
| 1     | 32.397    | 251505891 | 2336606 | 49.580  | 54.643   |
| 2     | 42.819    | 255769249 | 1939552 | 50.420  | 45.357   |
| Total |           | 507275140 | 4276158 | 100.000 | 100.000  |

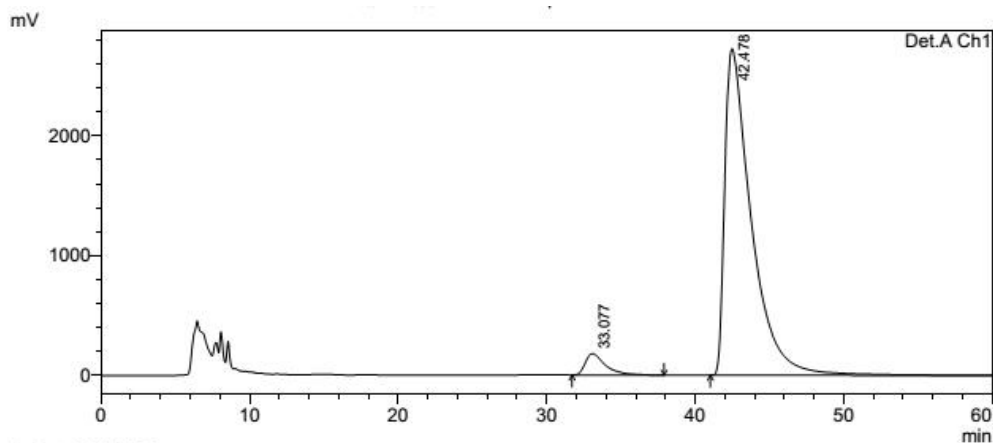

PeakTable

| Peak# | Ret. Time | Area      | Height  | Area %  | Height % |
|-------|-----------|-----------|---------|---------|----------|
| 1     | 33.077    | 16906734  | 178591  | 4.736   | 6.146    |
| 2     | 42.478    | 340064900 | 2727070 | 95.264  | 93.854   |
| Total |           | 356971634 | 2905661 | 100.000 | 100.000  |

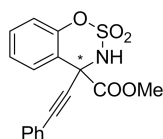

Methyl 4-(phenylethynyl)-3,4-dihydrobenzo[e][1,2,3]oxathiazine-4-carboxylate 2,2-dioxide (**5a**), 25.4 mg, 74% yield, yellow oil;  $^1\text{H}$  NMR (400 MHz,  $\text{CDCl}_3$ ):  $\delta$  7.87-7.84 (dd,  $J = 8.0, 1.6$  Hz, 1H), 7.49-7.45 (m, 2H), 7.44-7.39 (m, 1H), 7.37-7.27 (m, 4H), 7.09-7.05 (dd,  $J = 8.0, 1.2$  Hz, 1H), 3.97 (s, 1H);  $^{13}\text{C}$  NMR (100 MHz,  $\text{CDCl}_3$ ):  $\delta$  167.6, 149.7, 132.1, 131.2, 129.48, 129.46, 128.4, 125.9, 121.0, 119.5, 119.1, 86.5, 84.1, 62.2, 55.3; HRMS (ESI): calcd for  $\text{C}_{17}\text{H}_{14}\text{NO}_5\text{S}$   $[\text{M}+\text{H}]^+$  344.0593, found 344.0581.

HPLC: Daicel Chiralcel AD-H column (250 mm); detected at 220 nm; hexane/*i*-propanol = 90/10; flow = 0.5 mL/min; Retention time: 32.2 min; 35.4 min (major), 91% *ee*,  $[\alpha]_D^{25}$ : 7.714 (c 0.245,  $\text{CHCl}_3$ ).

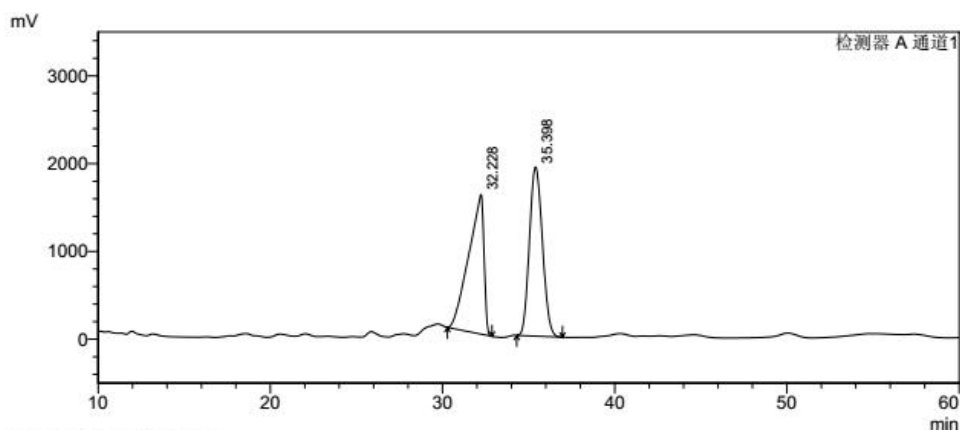

峰表

| 峰# | 保留时间   | 面积        | 高度      | 面积 %    | 高度 %    |
|----|--------|-----------|---------|---------|---------|
| 1  | 32.228 | 97991323  | 1591888 | 49.331  | 45.242  |
| 2  | 35.398 | 100647151 | 1926731 | 50.669  | 54.758  |
| 总计 |        | 198638474 | 3518619 | 100.000 | 100.000 |

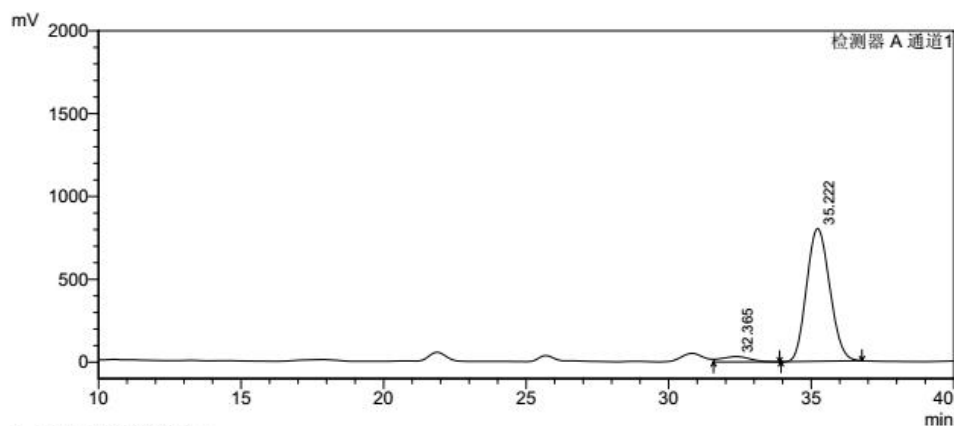

峰表

| 峰# | 保留时间   | 面积       | 高度     | 面积 %    | 高度 %    |
|----|--------|----------|--------|---------|---------|
| 1  | 32.365 | 2208965  | 31808  | 4.641   | 3.817   |
| 2  | 35.222 | 45389424 | 801449 | 95.359  | 96.183  |
| 总计 |        | 47598389 | 833257 | 100.000 | 100.000 |

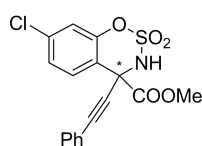

Methyl 7-chloro-4-(phenylethynyl)-3,4-dihydrobenzo[e][1,2,3]oxathiazine-4-carboxylate 2,2-dioxide (**5b**), 30.5 mg, 81% yield, yellow oil; <sup>1</sup>H NMR (400 MHz, CDCl<sub>3</sub>): δ 7.81-7.78 (d, *J* = 8.8 Hz, 1H), 7.48-7.44 (m, 2H), 7.40-7.26 (m, 4H), 7.11-7.09 (d, *J* = 2.0 Hz, 1H), 3.97 (s, 1H); <sup>13</sup>C NMR (100 MHz, CDCl<sub>3</sub>): δ 167.3, 149.9, 136.7, 132.1, 130.6, 129.6, 128.4, 126.3, 120.8, 119.6, 117.7, 86.9, 83.6, 61.9, 55.4; HRMS (ESI): calcd for C<sub>17</sub>H<sub>13</sub>NO<sub>5</sub>SCl [M+H]<sup>+</sup> 378.0203, found 378.0217.

HPLC: Daicel Chiralcel AD-H column (250 mm); detected at 220 nm; hexane/*i*-propanol = 90/10; flow = 0.5 mL/min; Retention time: 30.1 min; 35.5 min (major), 77% *ee*, [α]<sub>D</sub><sup>25</sup>: 3.026 (c 0.33, CHCl<sub>3</sub>).

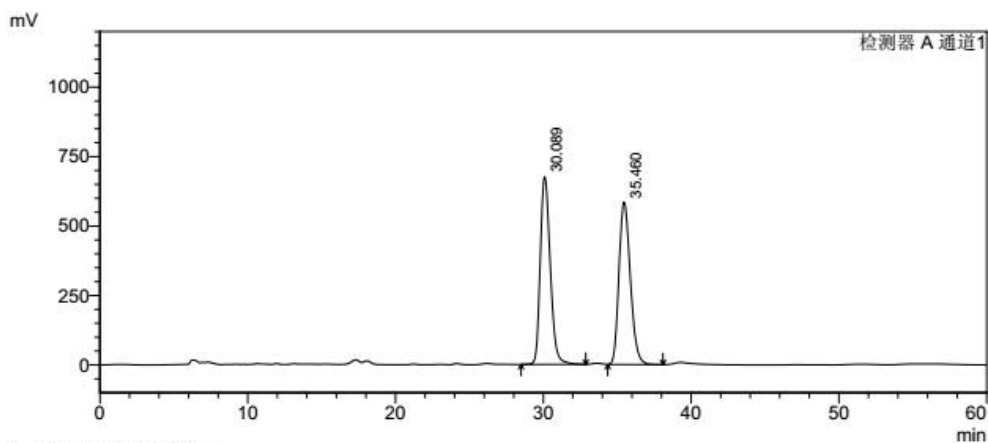

峰表

| 峰# | 保留时间   | 面积       | 高度      | 面积 %    | 高度 %    |
|----|--------|----------|---------|---------|---------|
| 1  | 30.089 | 31663467 | 675518  | 50.305  | 53.596  |
| 2  | 35.460 | 31279089 | 584860  | 49.695  | 46.404  |
| 总计 |        | 62942556 | 1260378 | 100.000 | 100.000 |

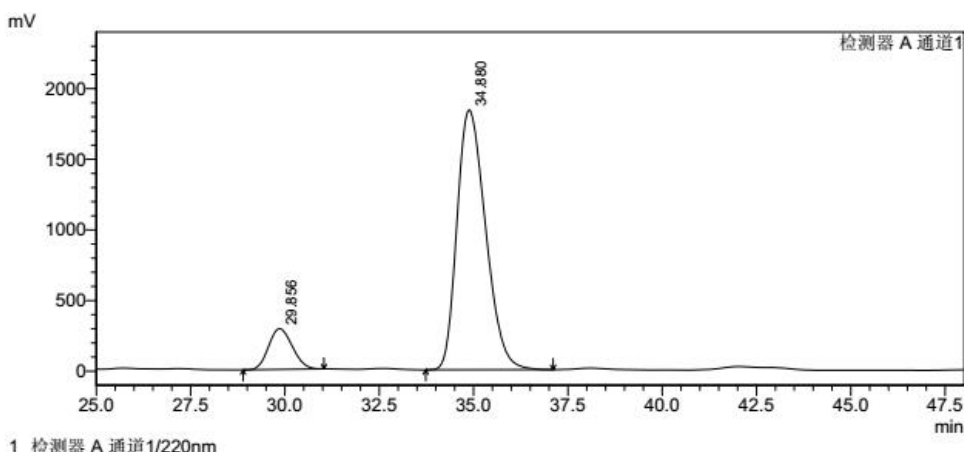

峰表

| 峰# | 保留时间   | 面积        | 高度      | 面积 %    | 高度 %    |
|----|--------|-----------|---------|---------|---------|
| 1  | 29.856 | 12661622  | 288506  | 11.540  | 13.565  |
| 2  | 34.880 | 97054303  | 1838328 | 88.460  | 86.435  |
| 总计 |        | 109715924 | 2126834 | 100.000 | 100.000 |

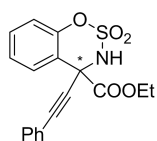

Ethyl 4-(phenylethynyl)-3,4-dihydrobenzo[e][1,2,3]oxathiazine-4-carboxylate 2,2-dioxi de

(5c), 28.5 mg, 82% yield, yellow oil;  $^1\text{H}$  NMR (400 MHz,  $\text{CDCl}_3$ ):  $\delta$  7.88-7.85 (dd,  $J = 8.0, 1.6$  Hz, 1H), 7.49-7.45 (m, 2H), 7.44-7.39 (m, 1H), 7.37-7.27 (m, 4H), 7.08-7.06 (dd,  $J = 8.0, 1.2$  Hz, 1H), 4.45-4.36 (m, 2H), 1.40-1.36 (t,  $J = 7.2$  Hz, 3H);  $^{13}\text{C}$  NMR (100 MHz,  $\text{CDCl}_3$ ):  $\delta$  167.0, 149.7, 132.1, 131.1, 129.40, 129.39, 128.4, 125.8, 121.1, 119.5, 119.2, 86.3, 84.4, 64.9, 62.2, 13.9; HRMS (ESI): calcd for  $\text{C}_{18}\text{H}_{16}\text{NO}_5\text{S}$   $[\text{M}+\text{H}]^+$  358.0749, found 358.0760.

HPLC: Daicel Chiralcel AD-H column (250 mm); detected at 220 nm; hexane/*i*-propanol = 90/10; flow = 0.5 mL/min; Retention time: 27.6 min; 31.6 min (major), 37% *ee*,  $[\alpha]^{25}$ : -0.110 (c 0.73,  $\text{CHCl}_3$ ).

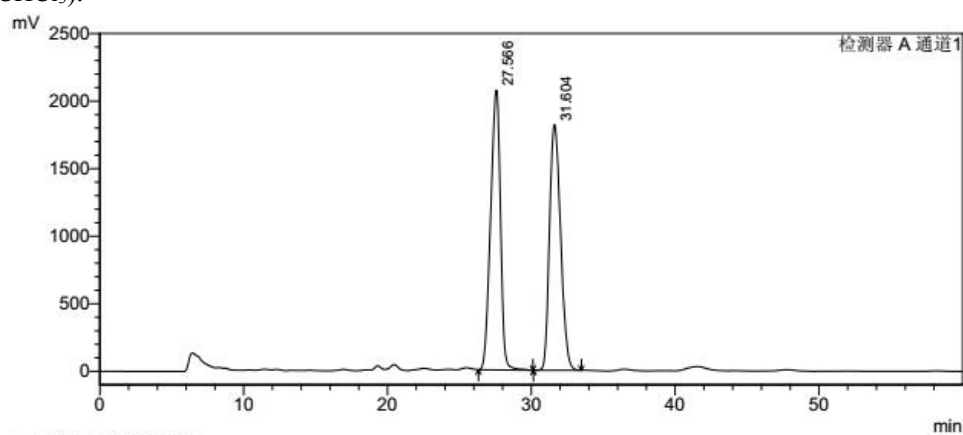

峰表

| 峰# | 保留时间   | 面积        | 高度      | 面积 %    | 高度 %    |
|----|--------|-----------|---------|---------|---------|
| 1  | 27.566 | 98230384  | 2071310 | 50.258  | 53.246  |
| 2  | 31.604 | 97223338  | 1818794 | 49.742  | 46.754  |
| 总计 |        | 195453722 | 3890104 | 100.000 | 100.000 |

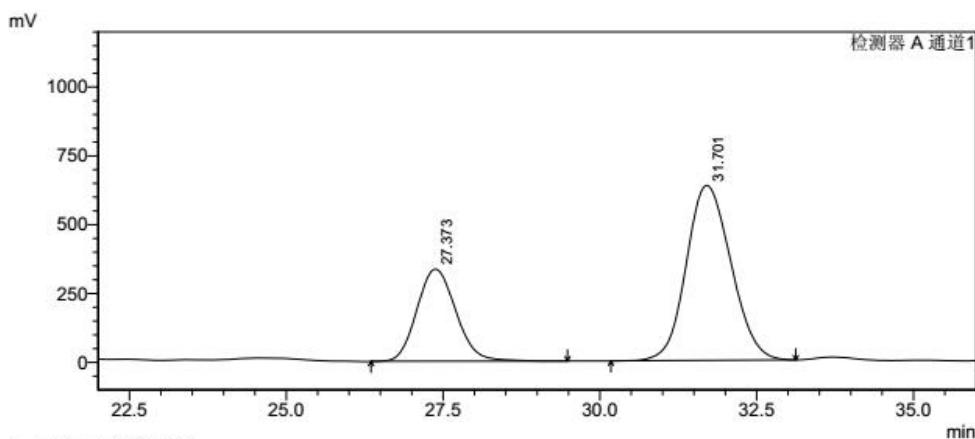

峰表

| 峰# | 保留时间   | 面积       | 高度     | 面积 %    | 高度 %    |
|----|--------|----------|--------|---------|---------|
| 1  | 27.373 | 14417227 | 334430 | 31.398  | 34.478  |
| 2  | 31.701 | 31499809 | 635551 | 68.602  | 65.522  |
| 总计 |        | 45917036 | 969982 | 100.000 | 100.000 |

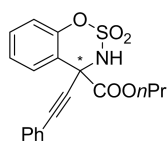

Propyl 4-(phenylethynyl)-3,4-dihydrobenzo[e][1,2,3]oxathiazine-4-carboxylate 2,2-dioxi de

(**5d**), 19.3 mg, 52% yield, yellow oil;  $^1\text{H NMR}$  (400 MHz,  $\text{CDCl}_3$ ):  $\delta$  7.89-7.86 (dd,  $J = 8.0, 1.6$  Hz, 1H), 7.48-7.45 (m, 2H), 7.43-7.38 (m, 1H), 7.36-7.28 (m, 4H), 7.08-7.05 (dd,  $J = 8.0, 1.2$  Hz, 1H), 4.40-4.24 (m, 2H), 1.82-1.73 (m, 2H), 1.02-0.98 (t,  $J = 7.2$  Hz, 3H);  $^{13}\text{C NMR}$  (100 MHz,  $\text{CDCl}_3$ ):  $\delta$  167.5, 150.0, 132.2, 131.3, 129.7, 129.6, 128.6, 125.9, 121.4, 119.7, 119.5, 86.3, 84.8, 70.5, 62.4, 22.0, 10.5; HRMS (ESI): calcd for  $\text{C}_{19}\text{H}_{18}\text{NO}_5\text{S}$   $[\text{M}+\text{H}]^+$  372.0906, found 372.0920.

HPLC: Daicel Chiralcel AD-H column (250 mm); detected at 220 nm; hexane/*i*-propanol = 90/10; flow = 0.5 mL/min; Retention time: 26.9 min; 30.0 min (major), 56% *ee*,  $[\alpha]_D^{25}$ : 1.135 (c 0.88,  $\text{CHCl}_3$ ).

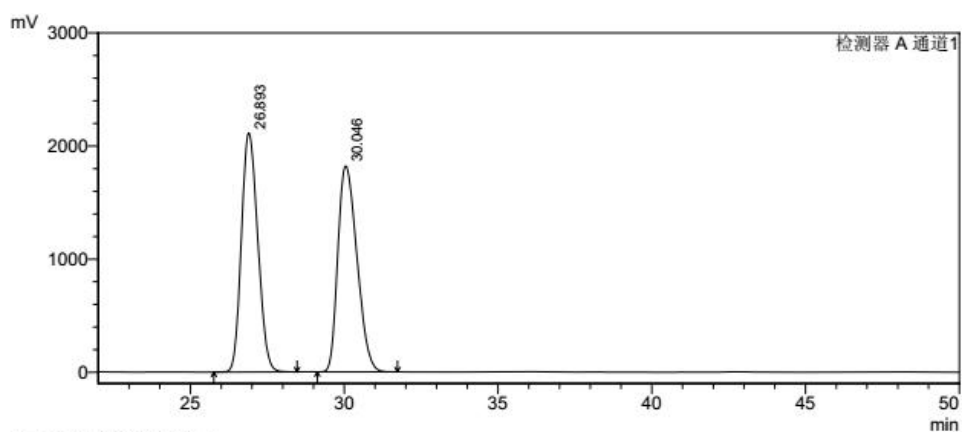

1 检测器 A 通道1/220nm

峰表

| 峰# | 保留时间   | 面积        | 高度      | 面积 %    | 高度 %    |
|----|--------|-----------|---------|---------|---------|
| 1  | 26.893 | 78191158  | 2114430 | 49.856  | 53.723  |
| 2  | 30.046 | 78641390  | 1821356 | 50.144  | 46.277  |
| 总计 |        | 156832548 | 3935786 | 100.000 | 100.000 |

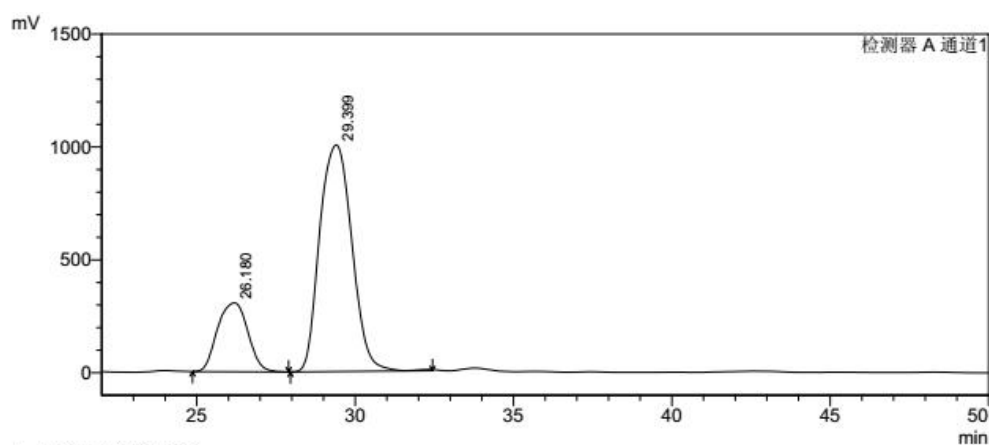

1 检测器 A 通道1/220nm

峰表

| 峰# | 保留时间   | 面积       | 高度      | 面积 %    | 高度 %    |
|----|--------|----------|---------|---------|---------|
| 1  | 26.180 | 20337252 | 304978  | 22.198  | 23.297  |
| 2  | 29.399 | 71280430 | 1004100 | 77.802  | 76.703  |
| 总计 |        | 91617682 | 1309078 | 100.000 | 100.000 |



## 8. General Procedure for the derivatives of **3aa** and **5a**.

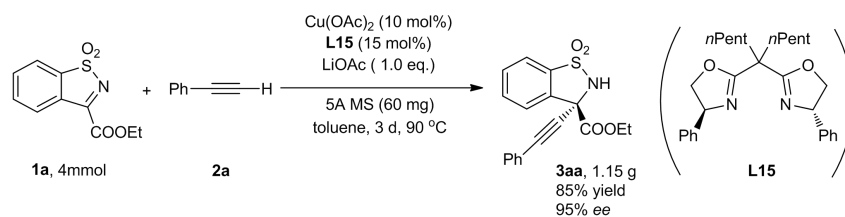

$\text{Cu}(\text{OAc})_2$  (72 mg, 10 mol %), 5Å MS (2.4 g) and **L15** (0.272 g, 15 mol%) were stirred in toluene (40.0 mL) at 90 °C for 1 h. Cyclic ketimines **1a** (0.956 g, 4.0 mmol) and  $\text{LiOAc}$  (0.264 g, 1.0 eq.) were added. After 15 min, ethynylbenzene **2a** (0.66 mL, 1.5 eq.) was added and stirred at 90 °C for 3 days. After completion, the reaction mixture was cooled down to room temperature and then quenched with 10% aqueous HCl solution. The aqueous layer was extracted further with DCM three times; then the combined organic layer was dried over  $\text{Na}_2\text{SO}_4$ . After concentration in vacuo, the residue was finally purified by flash chromatography eluting with ethyl acetate and petroleum ether (1:5 to 1:3) to give the product **3aa** as a yellow solid (1.159 g, 85%).

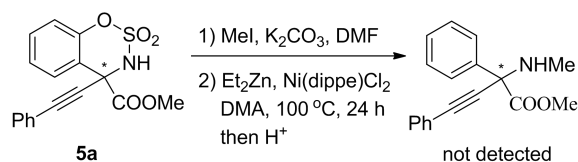

We tried to remove  $\text{SO}_2$  group according to ref. 4, but no desired product was detected.

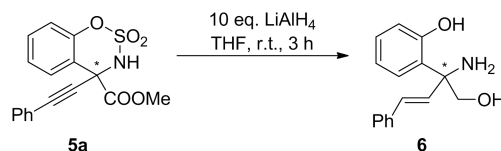

To a solution of the alkenylation product **5a** (34.3 mg, 0.1 mmol) in THF (1.0 mL) at room temperature was added  $\text{LiAlH}_4$  (1.0 N in THF, 1.0 mL, 1.0 mmol) dropwise over 2 mins and stirred at room temperature for 3 hours. The reaction was quenched carefully with  $\text{EtOAc}$  (2.0 mL) followed by  $\text{EtOH}$  (2.0 mL). The solution was concentrated in vacuo. The residue was purified by column chromatography (PE/EA = 2:1) to give the product **6**.

*E*-(*R*)-2-(2-amino-1-hydroxy-4-phenylbut-3-en-2-yl)phenol (**6**), 23.9 mg, 94% yield, yellow oil;  $^1\text{H}$  NMR (400 MHz  $\text{CDCl}_3$ ):  $\delta$  7.44-7.38 (m, 2H), 7.36-7.30 (m, 2H), 7.29-7.24 (m, 1H), 7.22-7.16 (m, 1H), 7.11 (dd,  $J = 8.0, 1.6$  Hz, 1H), 6.88 (dd,  $J = 8.0, 1.2$  Hz, 1H), 6.80 (td,  $J = 7.6, 1.2$  Hz, 1H), 6.58 (d,  $J = 16.4$  Hz, 1H), 6.43 (d,  $J = 16.4$  Hz, 1H), 4.10 (d,  $J = 11.2$  Hz, 1H), 3.79 (d,  $J = 11.2$  Hz, 1H);  $^{13}\text{C}$  NMR (100 MHz  $\text{CDCl}_3$ )  $\delta$  158.9, 136.4, 131.8, 130.5, 129.8, 128.9, 128.3, 127.5, 126.8, 124.9, 119.2, 118.4, 68.0, 62.3; HRMS (ESI) calcd for  $\text{C}_{16}\text{H}_{18}\text{NO}_2$   $[\text{M}+\text{H}]^+$  256.1338, found 256.1333.

HPLC: Daicel Chiralcel AY column (250 mm); detected at 210 nm; hexane/*i*-propanol = 90/10; flow = 0.5 mL/min; Retention time: 39.1 min; 45.2 min (major), 90% *ee*,  $[\alpha]^{25}$ : -8.929 (c 1.70,  $\text{CHCl}_3$ ).

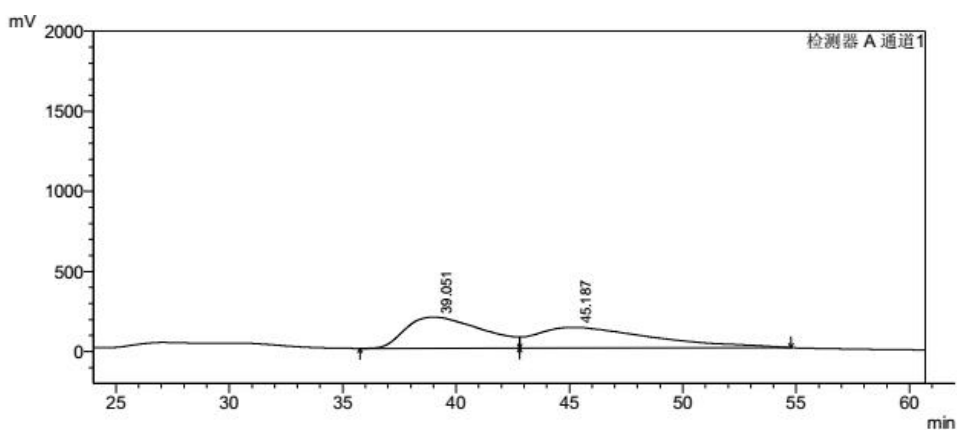

峰表

Detector A Ch1 210nm

| 峰# | 保留时间   | 面积       | 高度     | 面积 %    | 高度 %    |
|----|--------|----------|--------|---------|---------|
| 1  | 39.051 | 46168806 | 194224 | 50.102  | 60.105  |
| 2  | 45.187 | 45980044 | 128917 | 49.898  | 39.895  |
| 总计 |        | 92148850 | 323142 | 100.000 | 100.000 |

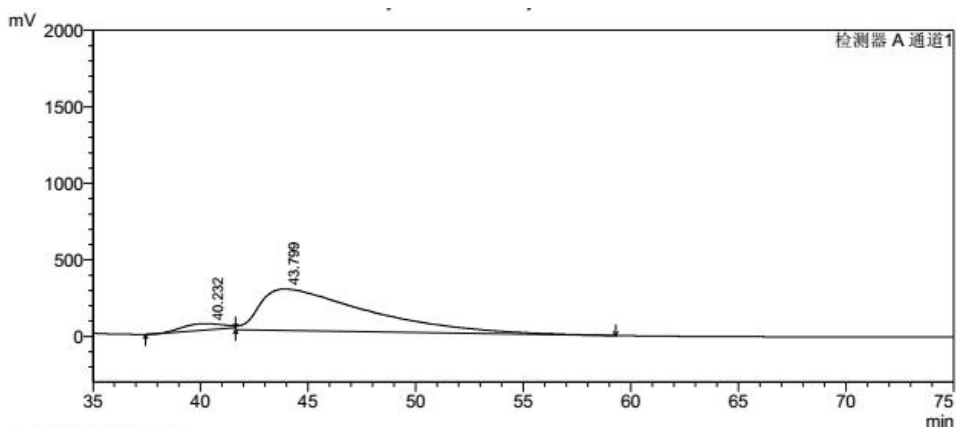

峰表

Detector A Ch1 210nm

| 峰# | 保留时间   | 面积        | 高度     | 面积 %    | 高度 %    |
|----|--------|-----------|--------|---------|---------|
| 1  | 40.232 | 5413039   | 40540  | 5.385   | 13.052  |
| 2  | 43.799 | 95114656  | 270061 | 94.615  | 86.948  |
| 总计 |        | 100527696 | 310601 | 100.000 | 100.000 |

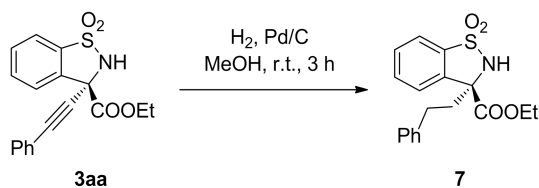

To a solution of **3aa** (34.1 mg, 0.1 mmol) in MeOH (1.0 mL) was added Pd/C (10 wt% of Pd, 16.0 mg), the mixture was stirred at room temperature for 3 hours and then filtrated off to removed the catalyst. After concentration under reduced pressure, the residue obtained was purified by column chromatography (PE:EA = 4:1) to give **7**.

(*R*)-ethyl 3-phenethyl-2,3-dihydrobenzo[*d*]isothiazole-3-carboxylate 1,1-dioxide (**7**), 34.2 mg, 99% yield, colorless oil; <sup>1</sup>H NMR (400 MHz, CDCl<sub>3</sub>): δ 7.79-7.76 (d, *J* = 7.6 Hz, 1H), 7.73-7.69 (d, *J* = 8.0 Hz, 1H), 7.67-7.56 (m, 2H), 7.29-7.23 (m, 2H), 7.21-7.12 (m, 3H), 5.87 (br, 1H), 4.30-4.21 (m,

2H), 2.80-2.61 (m, 2H), 2.58-2.48 (m, 1H), 2.36-2.26 (m, 1H), 1.37-1.31 (t,  $J = 7.2$  Hz, 3H).<sup>[1b]</sup>

HPLC: Daicel Chiralcel AD-H column (250 mm); detected at 220 nm; hexane/*i*-propanol = 80/20; flow = 1.0 mL/min; Retention time: 21.1 min (major); 27.5 min, 92% *ee*,  $[\alpha]_D^{25}$ : 12.689 (c 0.85, CHCl<sub>3</sub>).

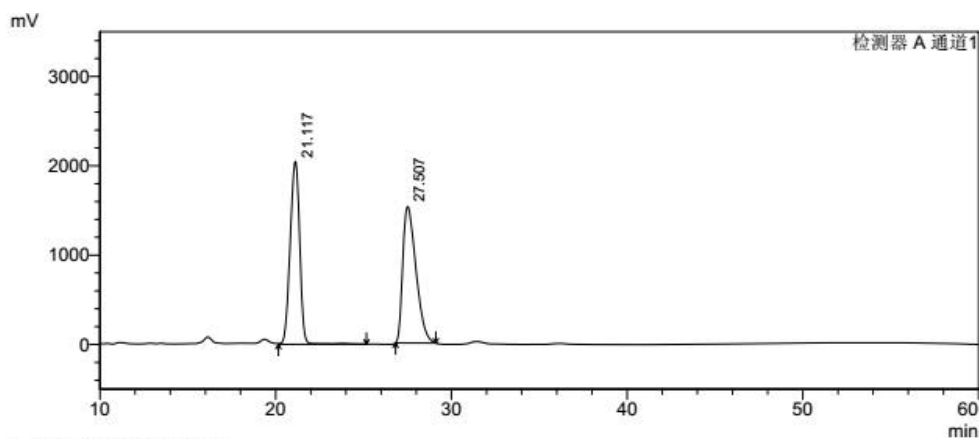

峰表

| 峰# | 保留时间   | 面积        | 高度      | 面积 %    | 高度 %    |
|----|--------|-----------|---------|---------|---------|
| 1  | 21.117 | 77362252  | 2047441 | 49.207  | 57.282  |
| 2  | 27.507 | 79854274  | 1526857 | 50.793  | 42.718  |
| 总计 |        | 157216527 | 3574298 | 100.000 | 100.000 |

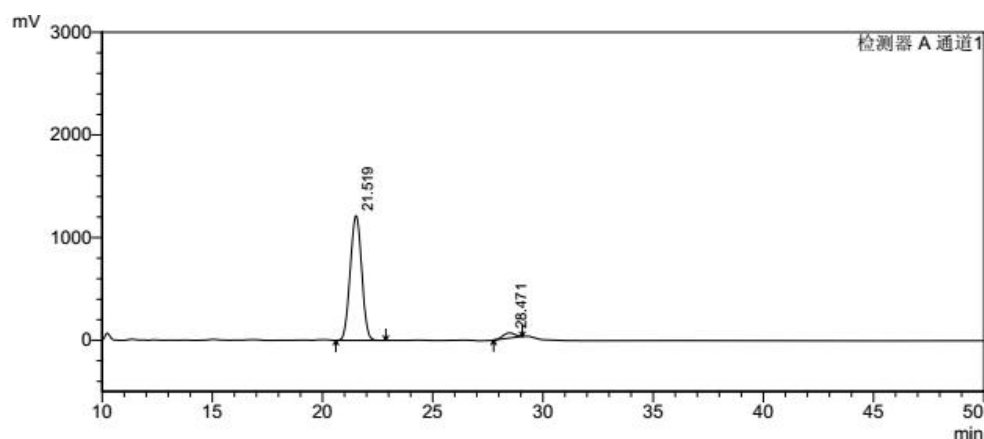

峰表

| 峰# | 保留时间   | 面积       | 高度      | 面积 %    | 高度 %    |
|----|--------|----------|---------|---------|---------|
| 1  | 21.519 | 43933201 | 1214951 | 95.941  | 96.040  |
| 2  | 28.471 | 1858535  | 50100   | 4.059   | 3.960   |
| 总计 |        | 45791736 | 1265052 | 100.000 | 100.000 |

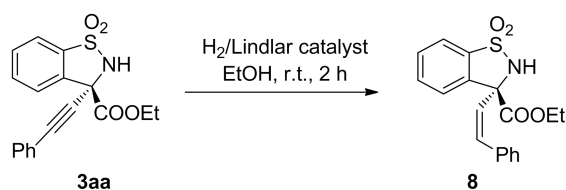

To a solution of **3aa** (34.1 mg, 0.1 mmol) in EtOH (1.0 mL) was added Lindlar catalyst (5 wt% of Pd, 78.0 mg), the mixture was stirred at room temperature for 2 hours and then filtrated off

to removed the catalyst. After concentration under reduced pressure, the residue obtained was purified by column chromatography (PE:EA = 4:1) to give **8**.

*Z*-(*R*)-ethyl 3-styryl-2,3-dihydrobenzo[*d*]isothiazole-3-carboxylate 1,1-dioxide (**8**), 31.2 mg, 91% yield, yellow oil; <sup>1</sup>H NMR (400 MHz, CDCl<sub>3</sub>): δ 7.76-7.74 (d, *J* = 8.0 Hz, 1H), 7.71-7.68 (d, *J* = 7.2 Hz, 1H), 7.65-7.55 (m, 2H), 7.35-7.21 (m, 5H), 6.85-6.82 (d, *J* = 11.6 Hz, 1H), 5.92-5.89 (d, *J* = 11.6 Hz, 1H), 4.00-3.91 (m, 1H), 3.76-3.67 (m, 1H), 1.12-1.08 (t, *J* = 7.2 Hz, 3H); <sup>13</sup>C NMR (100 MHz, CDCl<sub>3</sub>): δ 169.2, 139.0, 135.3, 135.1, 135.0, 133.6, 130.6, 129.2, 128.6, 128.3, 128.0, 125.5, 121.3, 66.9, 63.6, 13.7.; HRMS (ESI): calcd for C<sub>18</sub>H<sub>18</sub>NO<sub>4</sub>S [M+H]<sup>+</sup> 344.0957, found 344.0944.

HPLC: Daicel Chiralcel OD-H column (250 mm); detected at 220 nm; hexane/*i*-propanol = 90/10; flow = 0.5 mL/min; Retention time: 30.1 min (major); 35.5 min, 94% *ee*, [ $\alpha$ ]<sup>25</sup>: 21.826 (c 0.97, CHCl<sub>3</sub>).

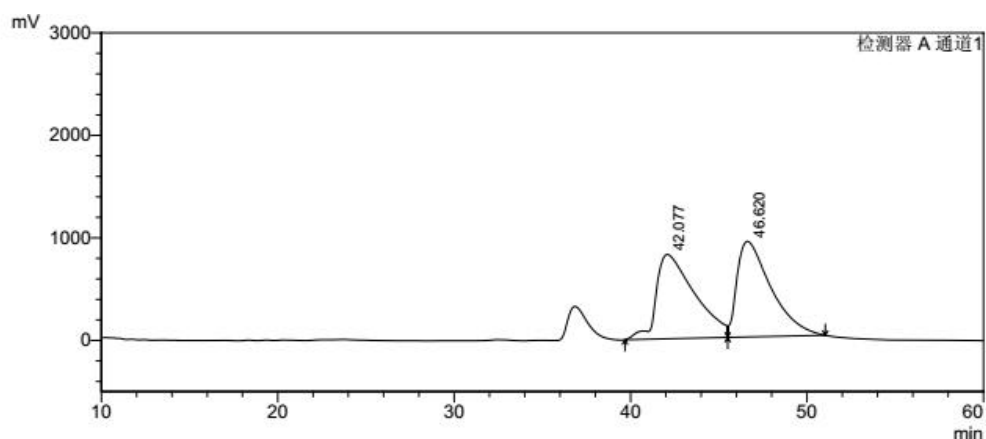

1 检测器 A 通道1/220nm

峰表

检测器 A Ch1 220nm

| 峰# | 保留时间   | 面积        | 高度      | 面积 %    | 高度 %    |
|----|--------|-----------|---------|---------|---------|
| 1  | 42.077 | 124443390 | 822000  | 49.829  | 46.851  |
| 2  | 46.620 | 125299726 | 932498  | 50.171  | 53.149  |
| 总计 |        | 249743116 | 1754498 | 100.000 | 100.000 |

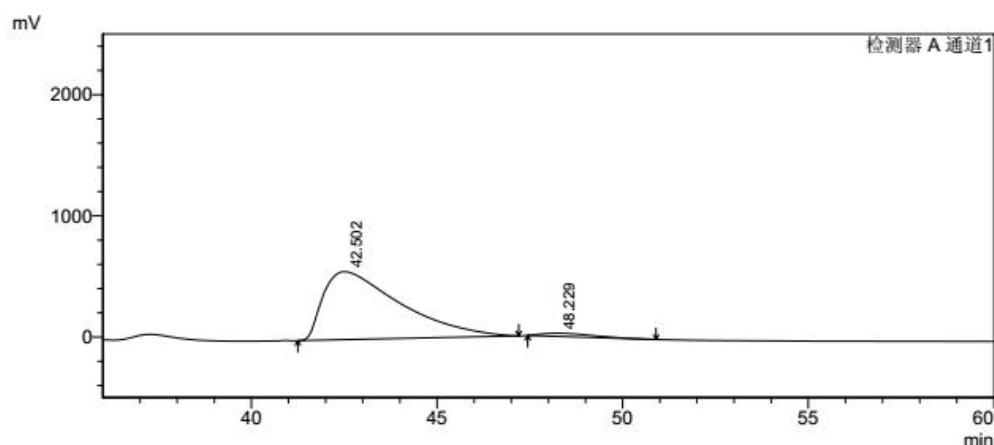

1 检测器 A 通道1/220nm

峰表

检测器 A Ch1 220nm

| 峰# | 保留时间   | 面积       | 高度     | 面积 %    | 高度 %    |
|----|--------|----------|--------|---------|---------|
| 1  | 42.502 | 80840601 | 560760 | 96.892  | 95.521  |
| 2  | 48.229 | 2593116  | 26292  | 3.108   | 4.479   |
| 总计 |        | 83433717 | 587052 | 100.000 | 100.000 |

## 9. References

[1] (a) H. Wang, T. Jiang, M.-H. Xu *J. Am. Chem. Soc.*, 2013, **135**, 971; (b) R.-R. Liu, D.-J. Wang, L. Wu, B. Xiang, G.-Q. Zhang, J.-R. Gao, Y.-X. Jia, *ACS Catal.*, 2015, **5**, 6524; (c) M. Quan, G. Yang, F. Xie, I. D. Gridnev, W. Zhang, *Org. Chem. Front.*, 2015, **2**, 398.

[2] J. Bayardon, D. Sinou, *J. Org. Chem.*, 2004, **69**, 3121.

[3] K. Morisaki, M Sawa, R. Yonesaki, H. Morimoto, K. Mashima, T. Ohshima, *J. Am. Chem. Soc.*, 2016, **138**, 6194.

[4] R. Takechi, T. Nishimura, *Org. Biomol. Chem.*, 2015, **13**, 4918.

## 10. Copies of $^1\text{H}$ NMR and $^{13}\text{C}$ NMR spectra

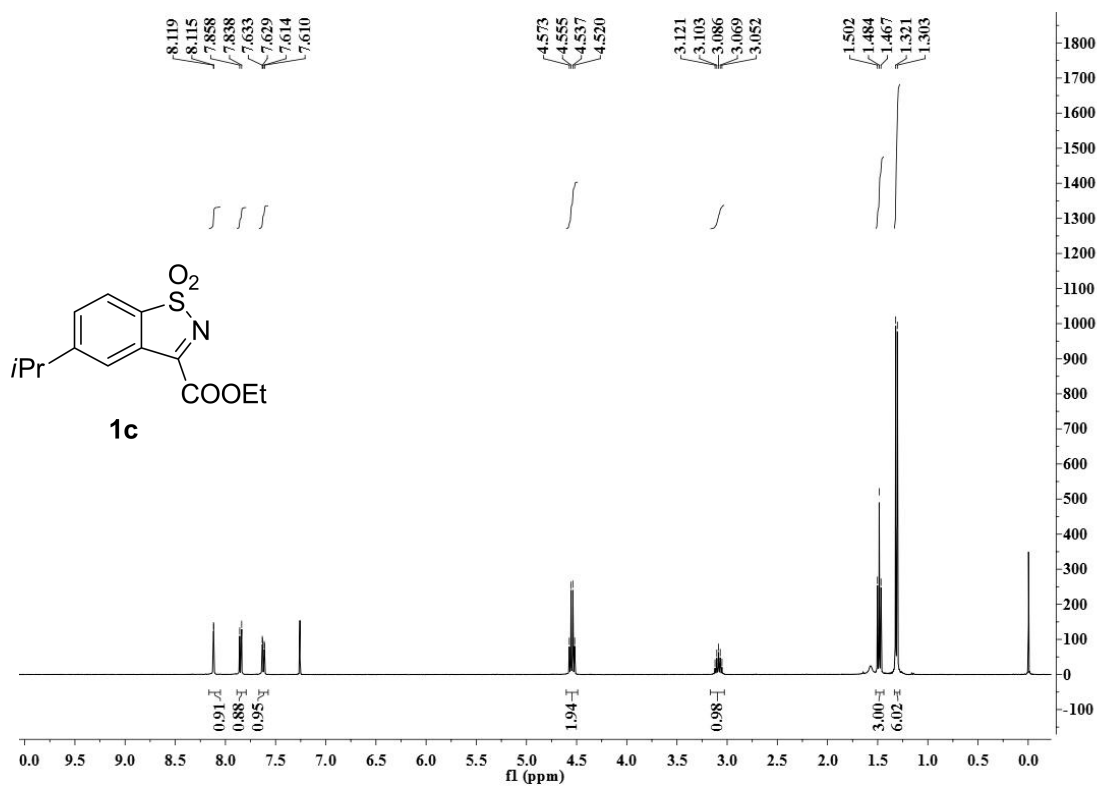

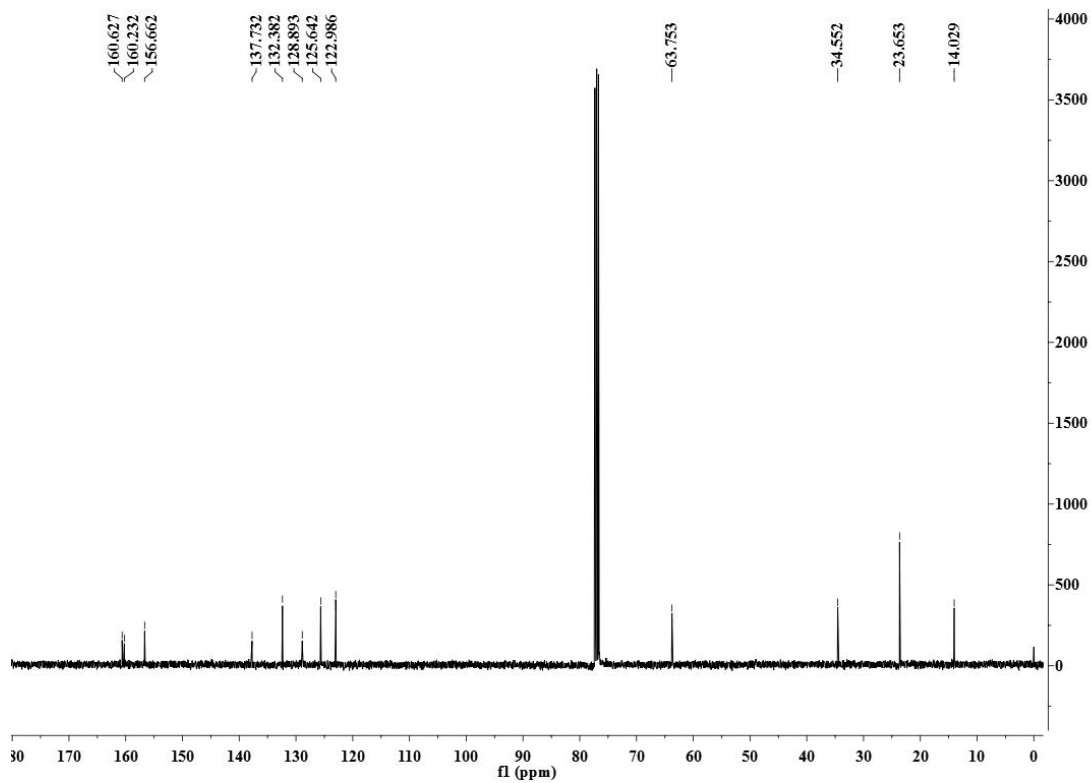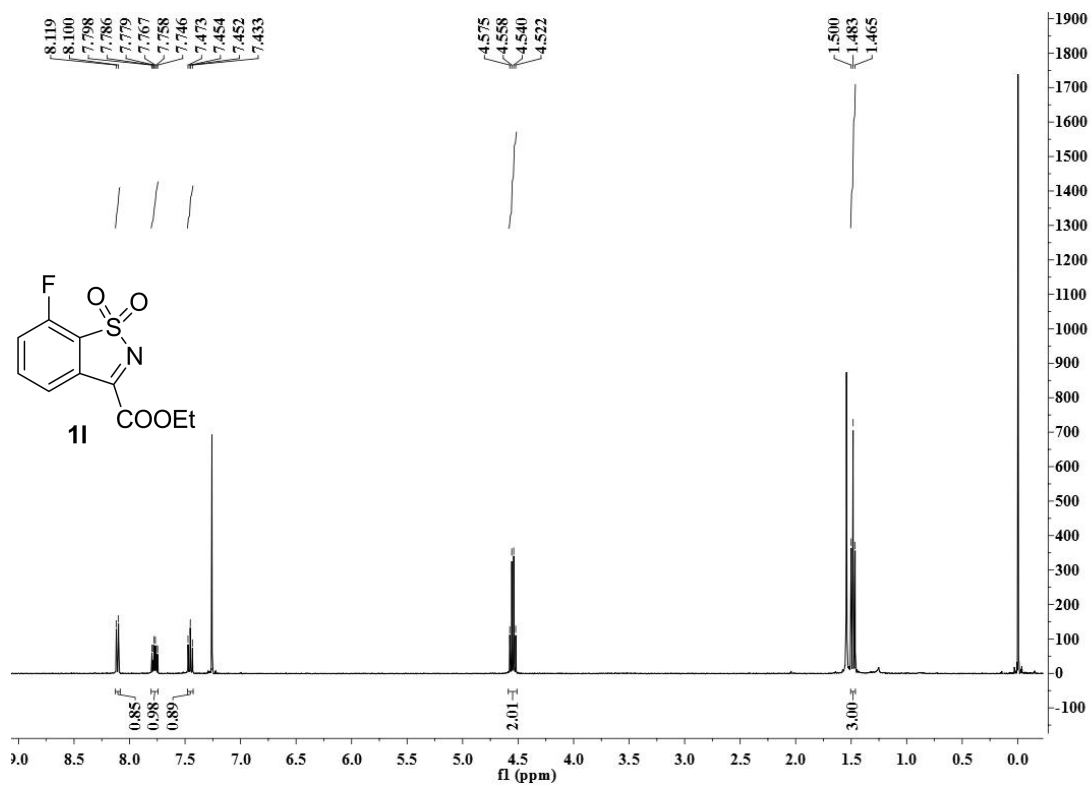

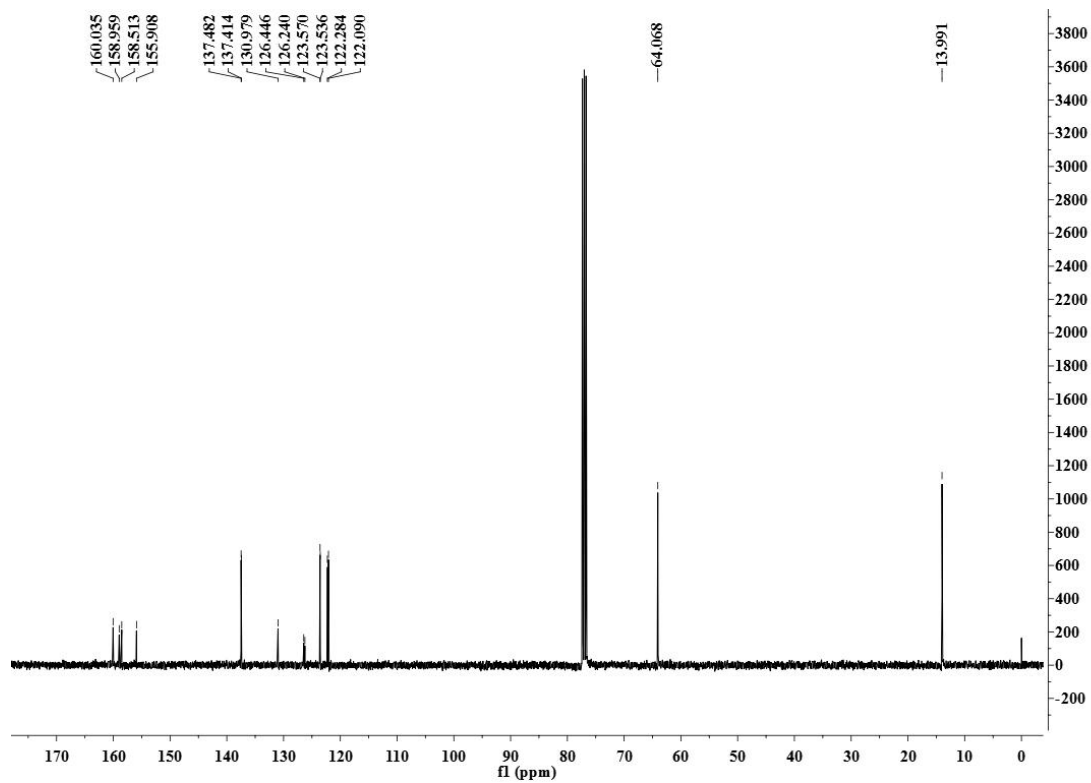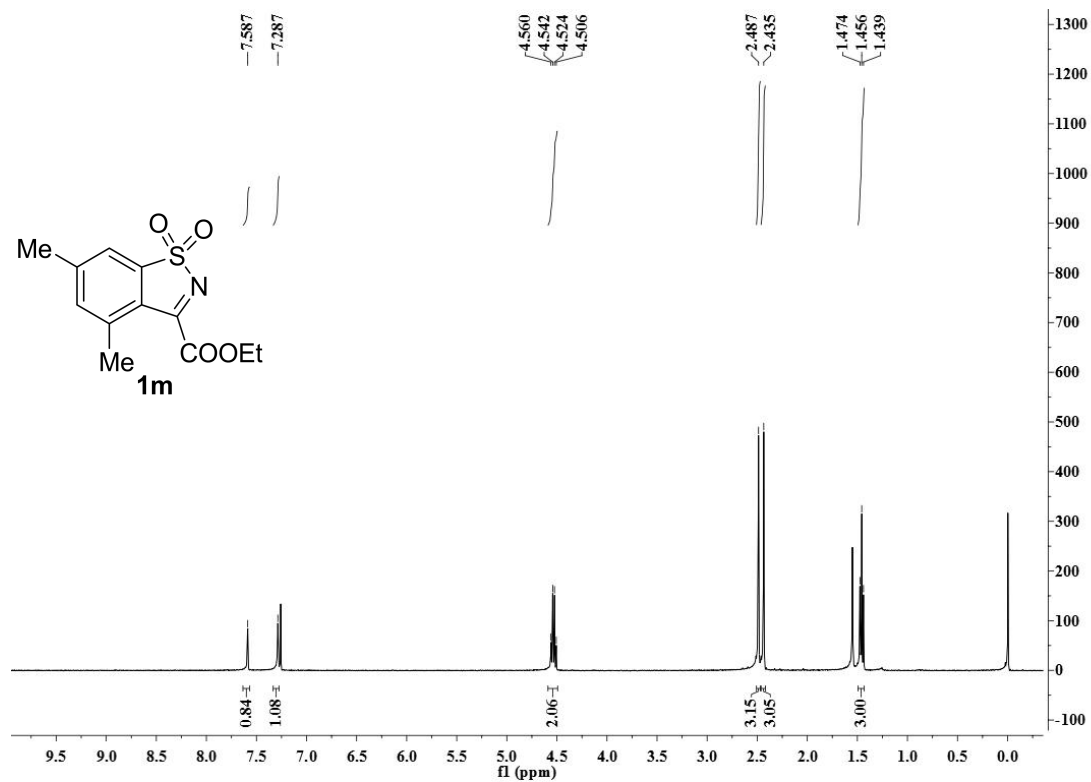

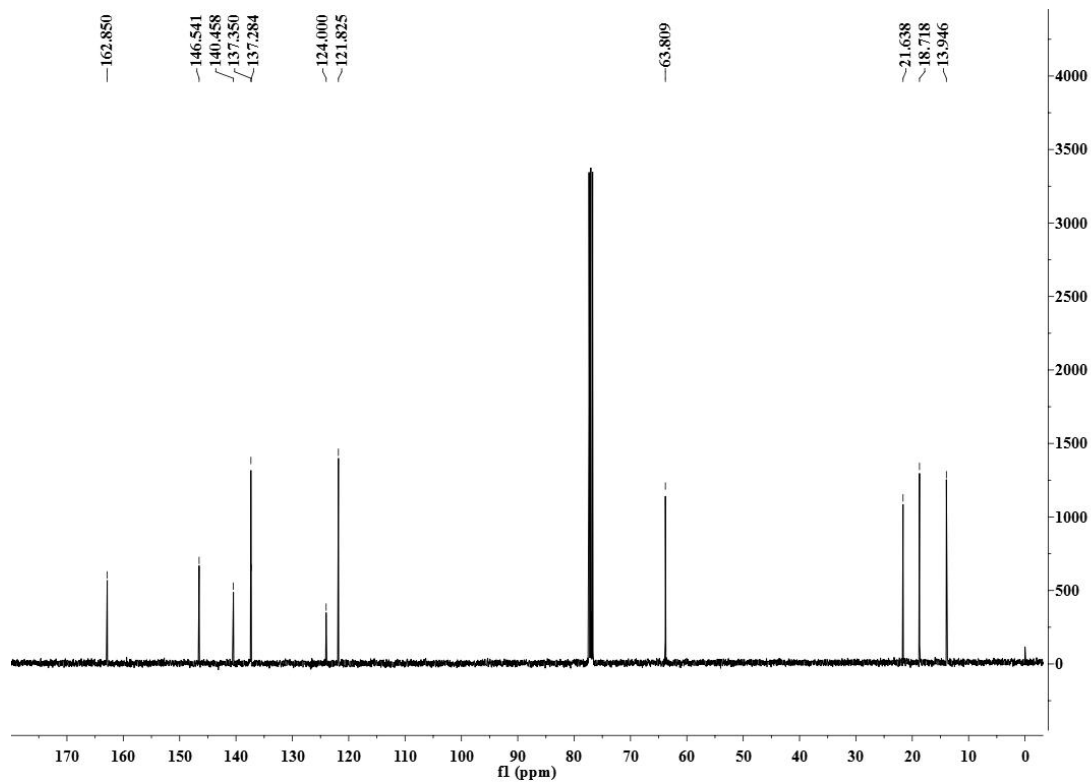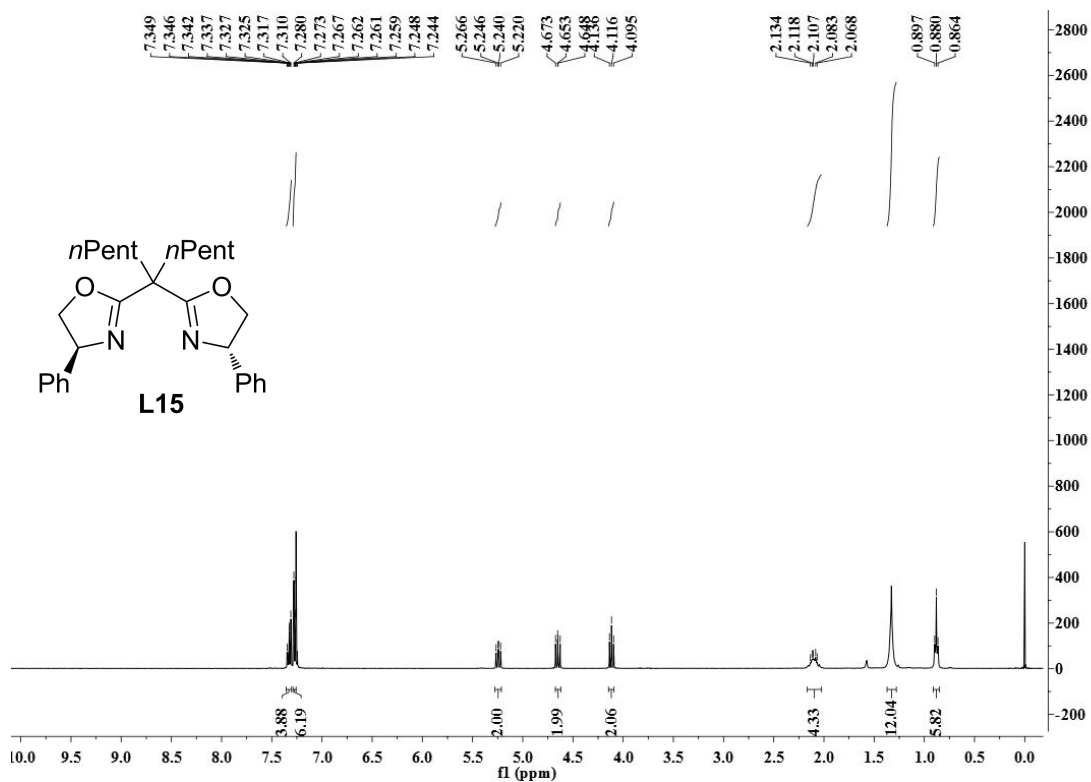



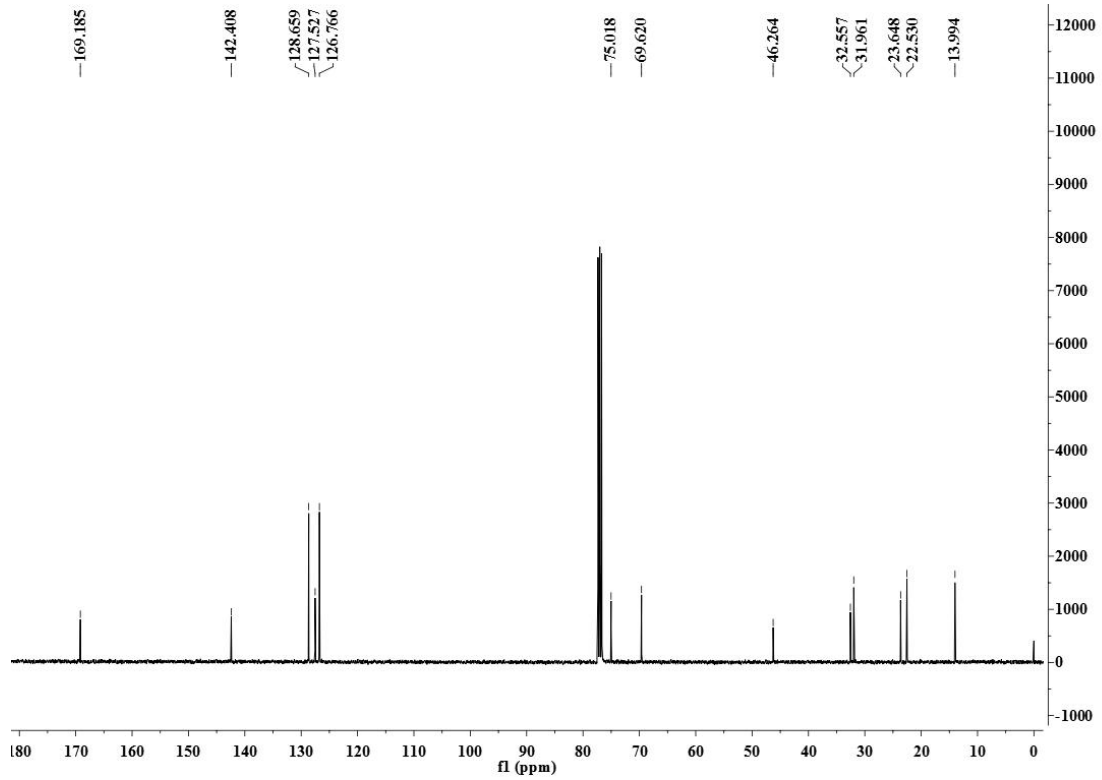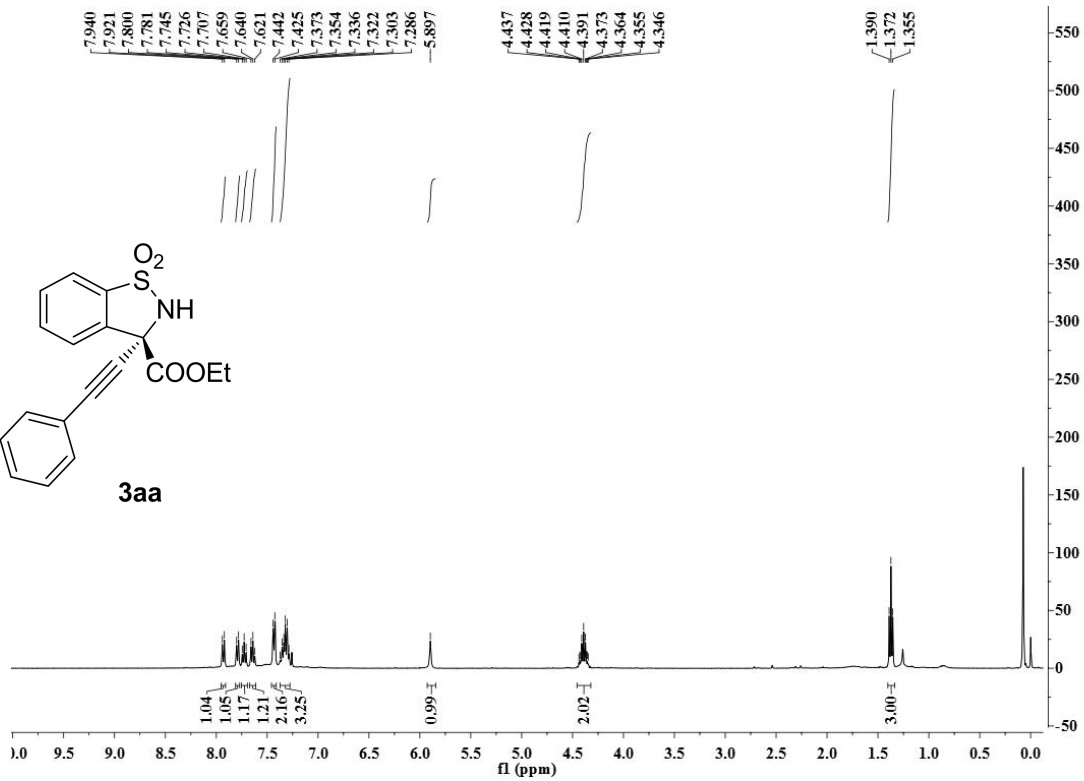

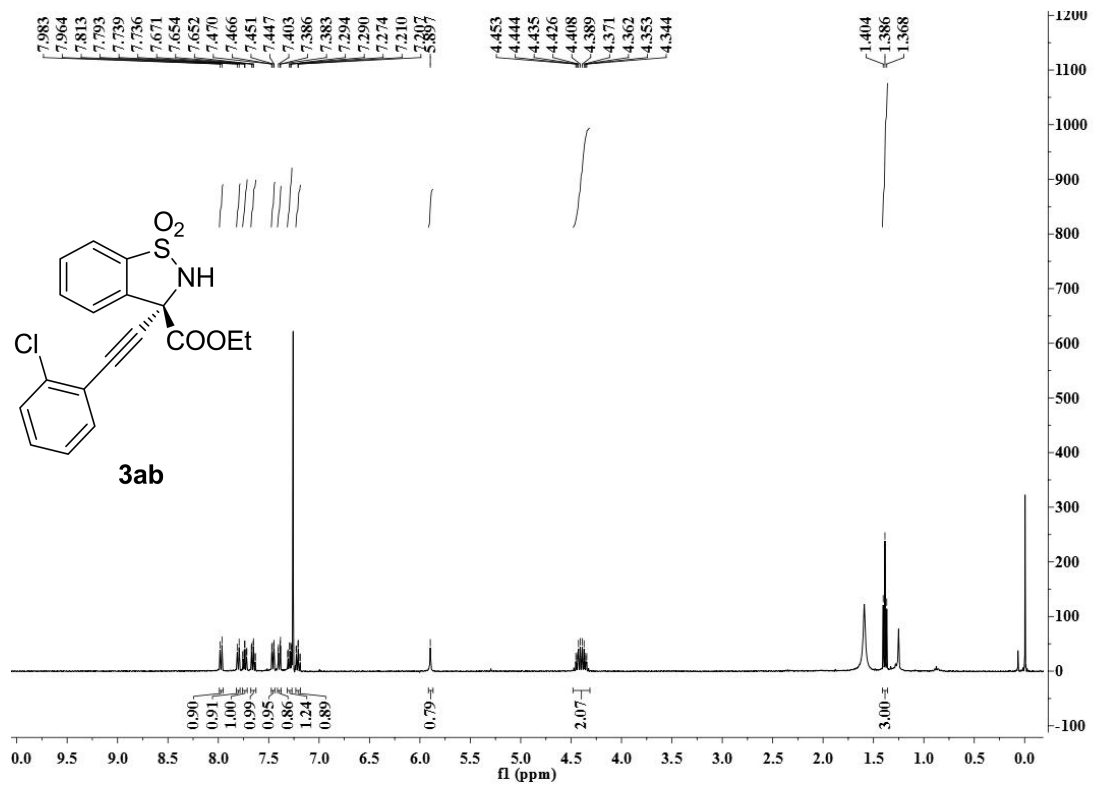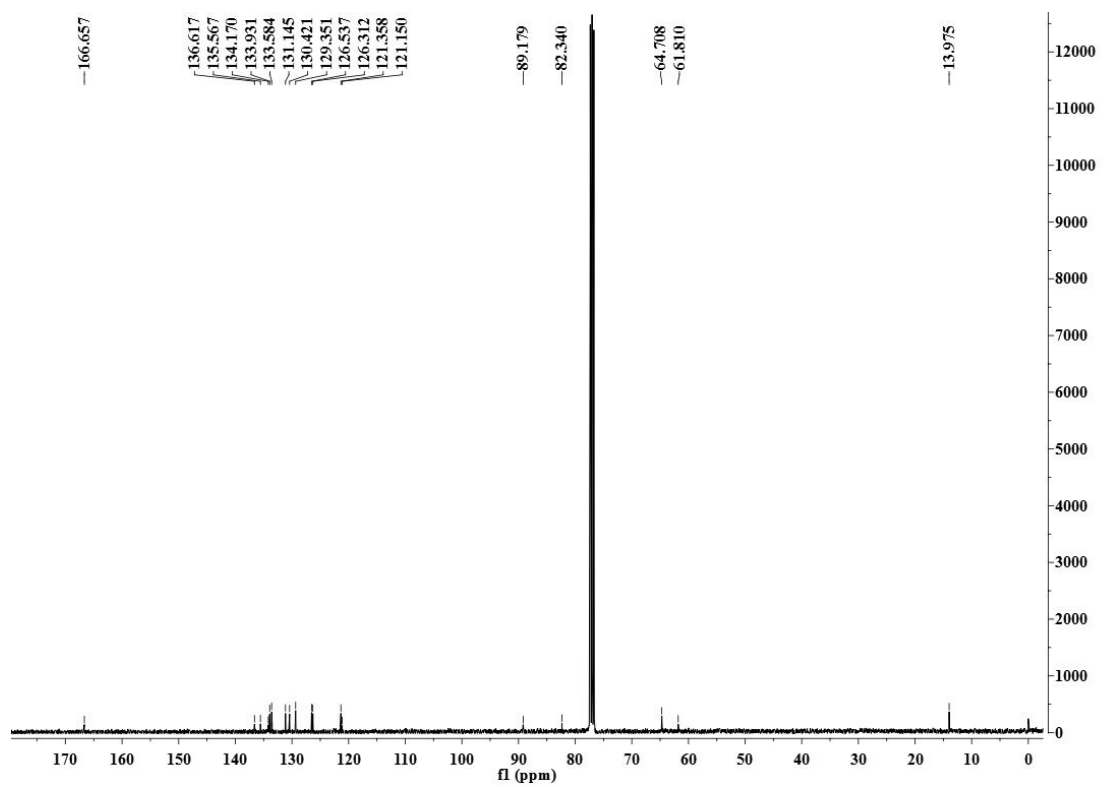

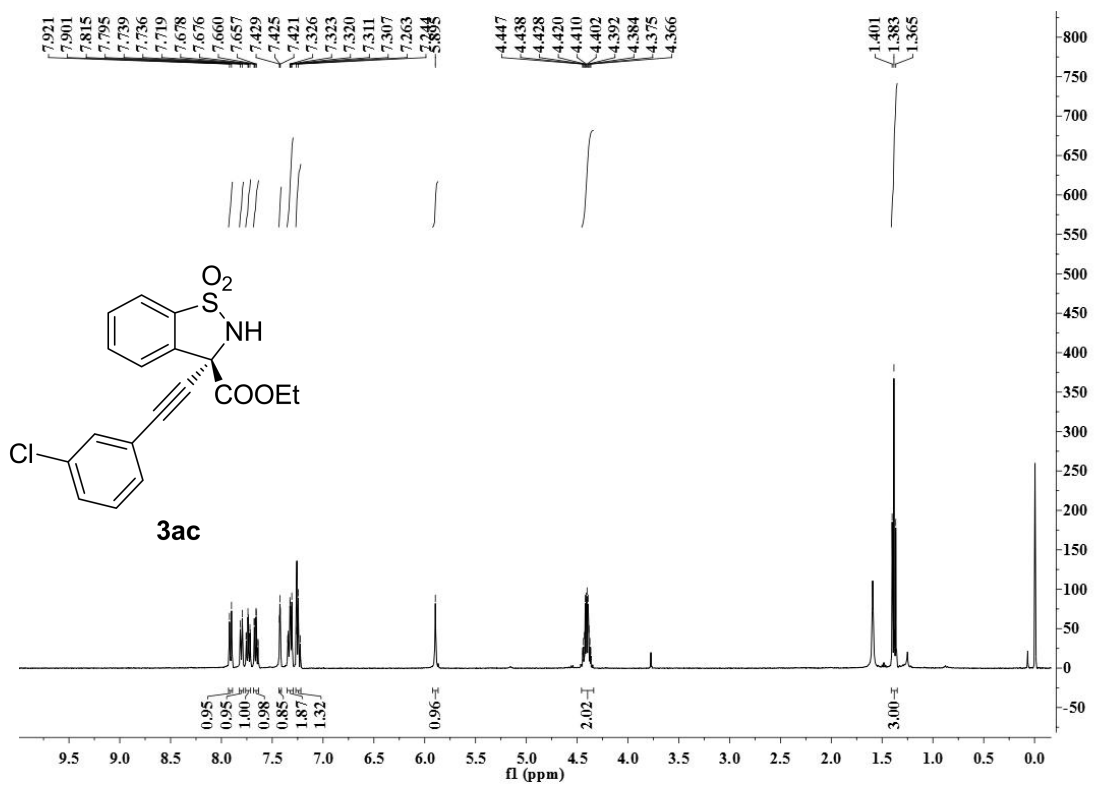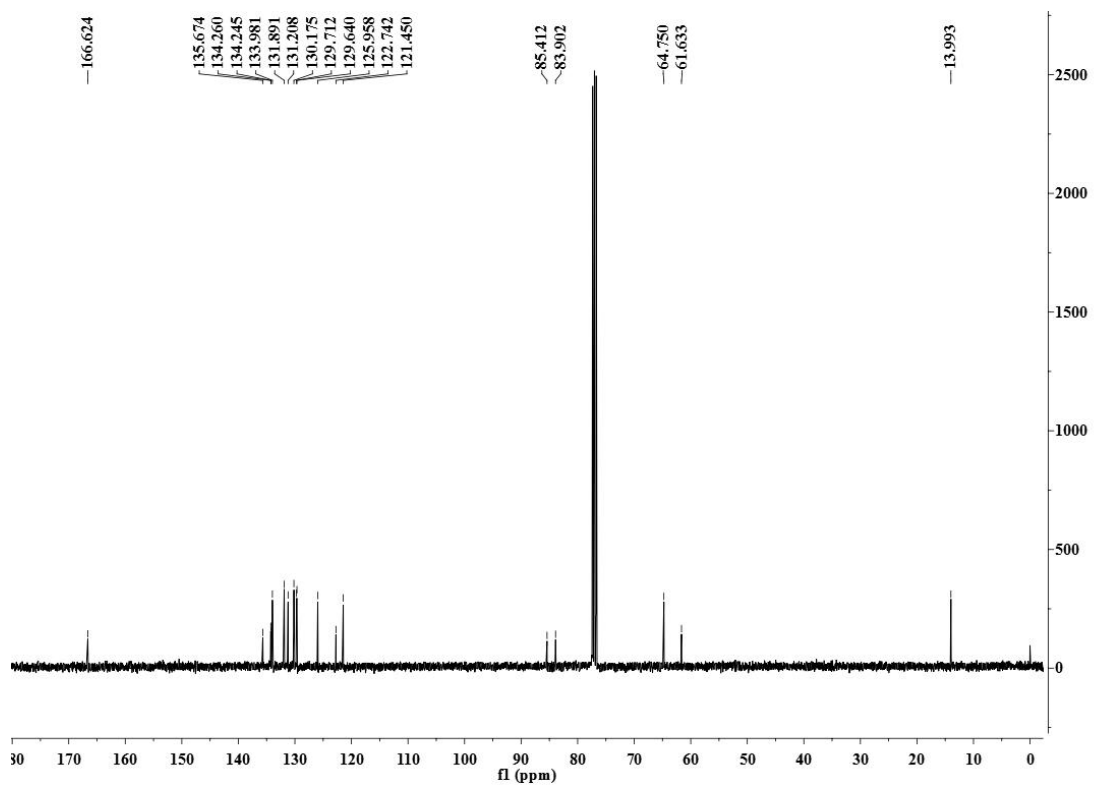

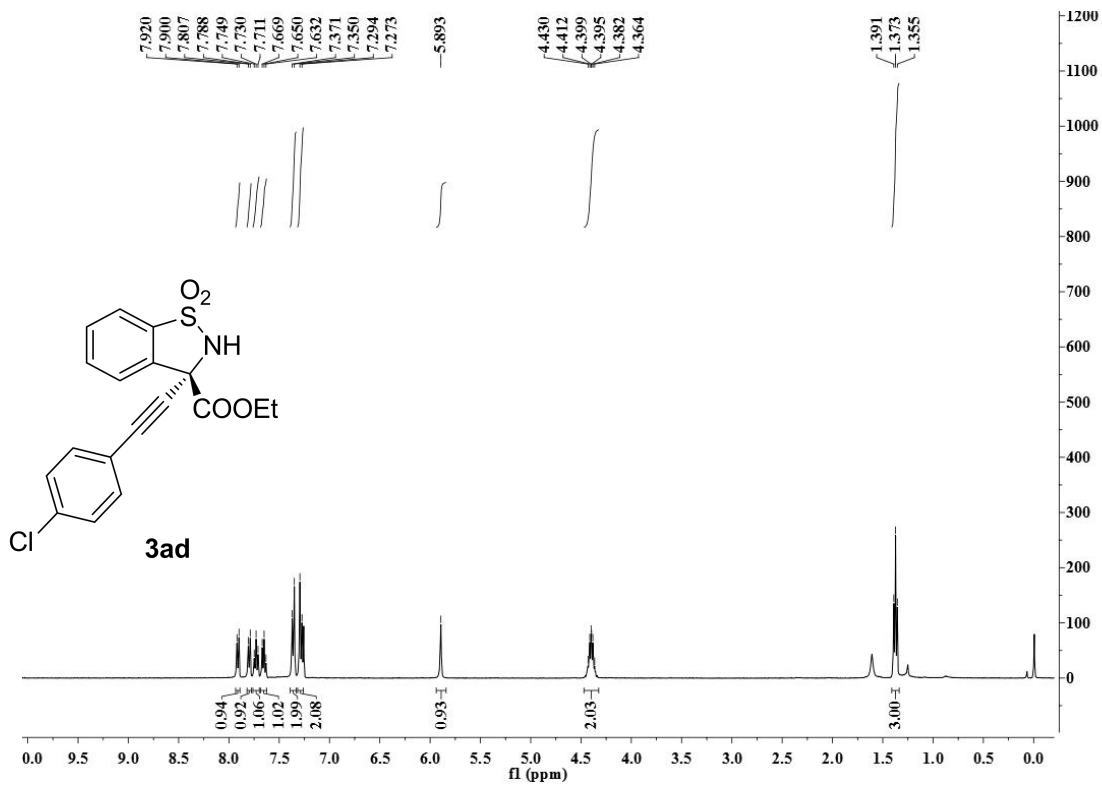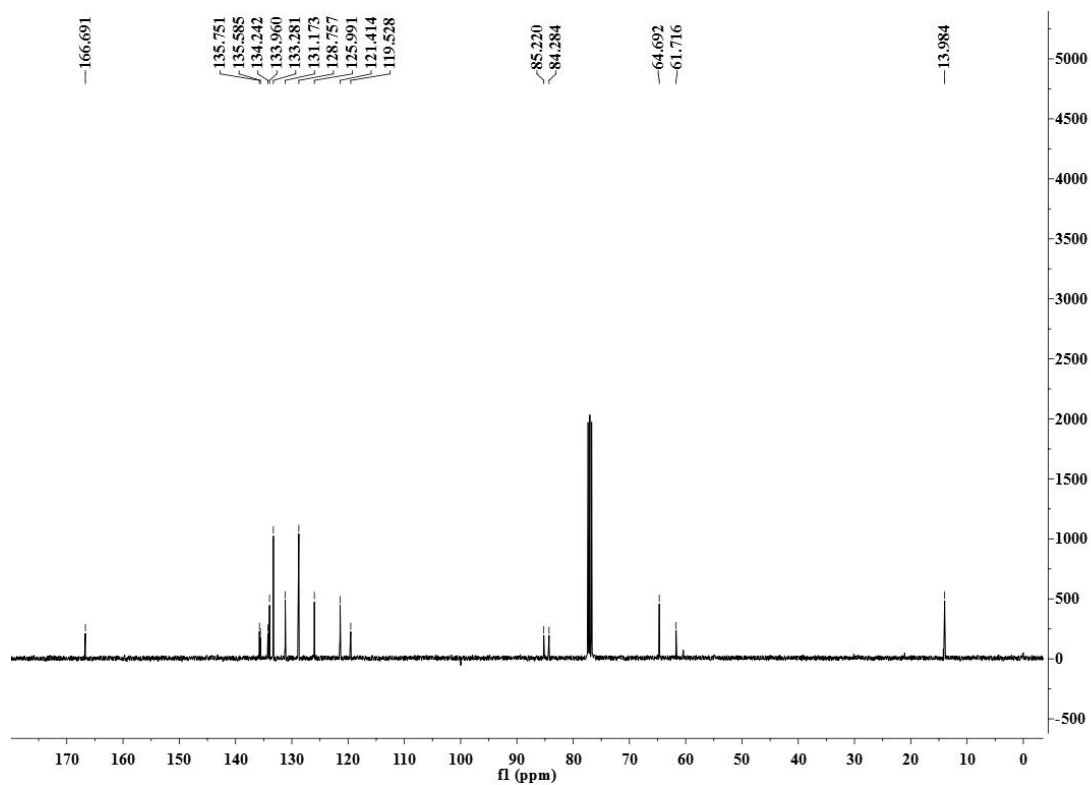

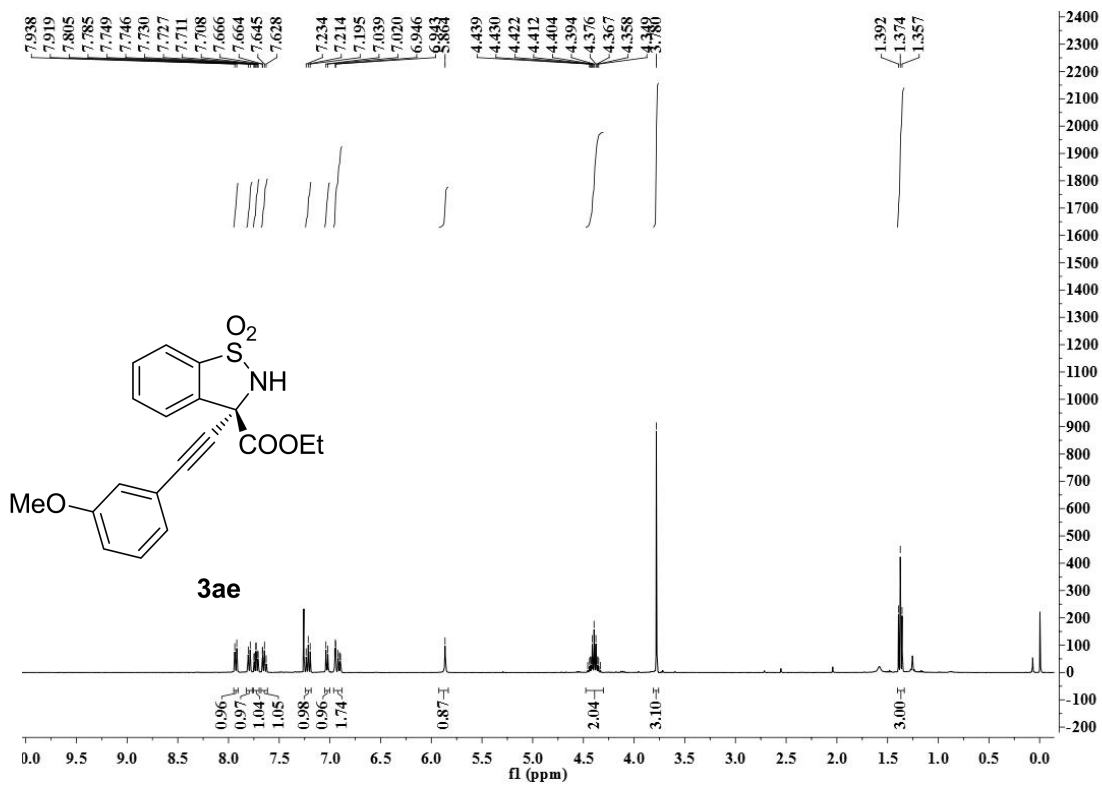

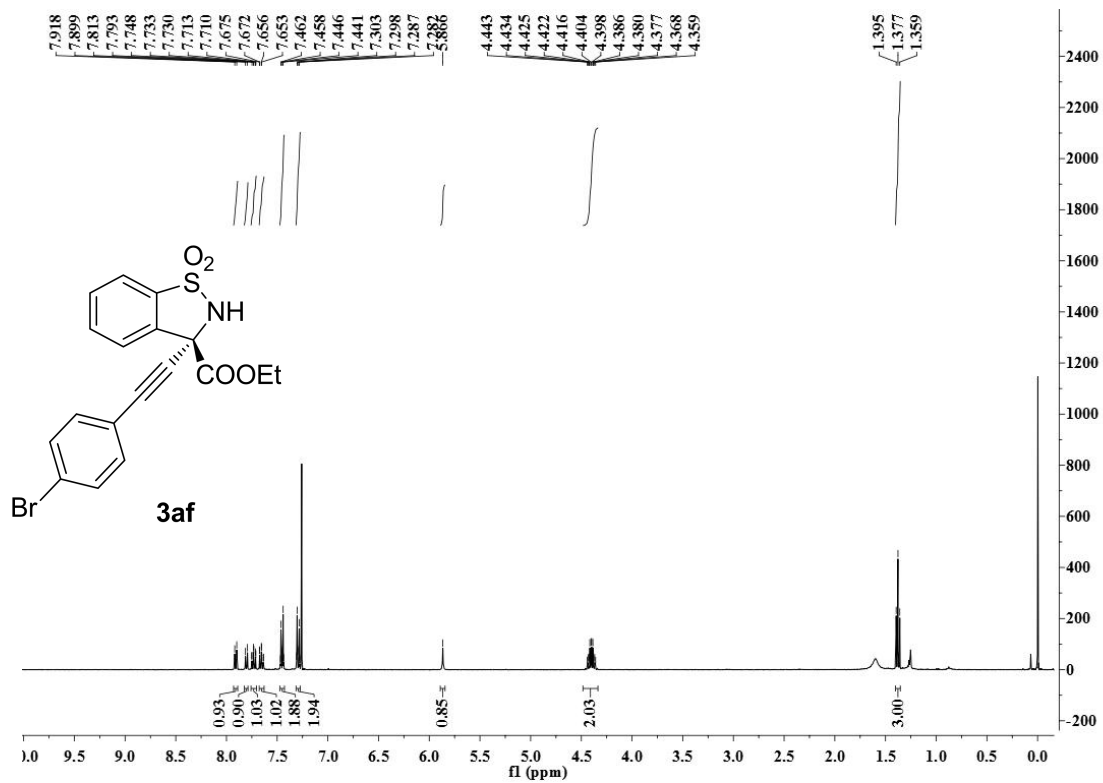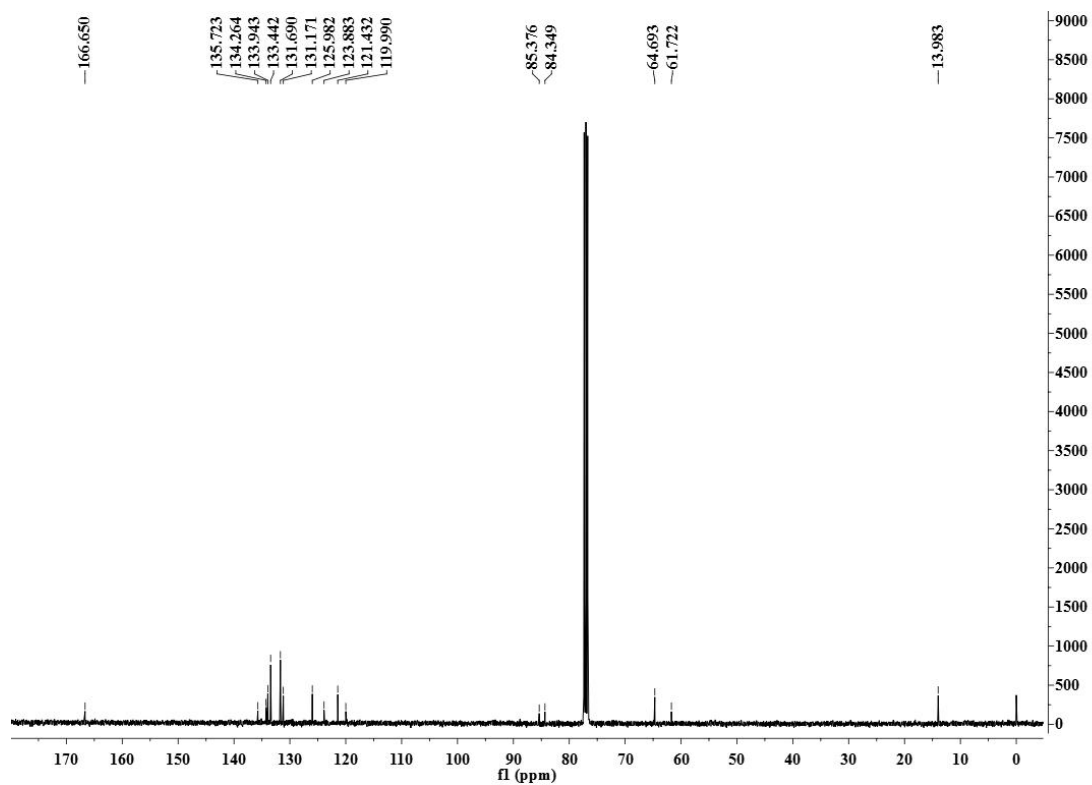

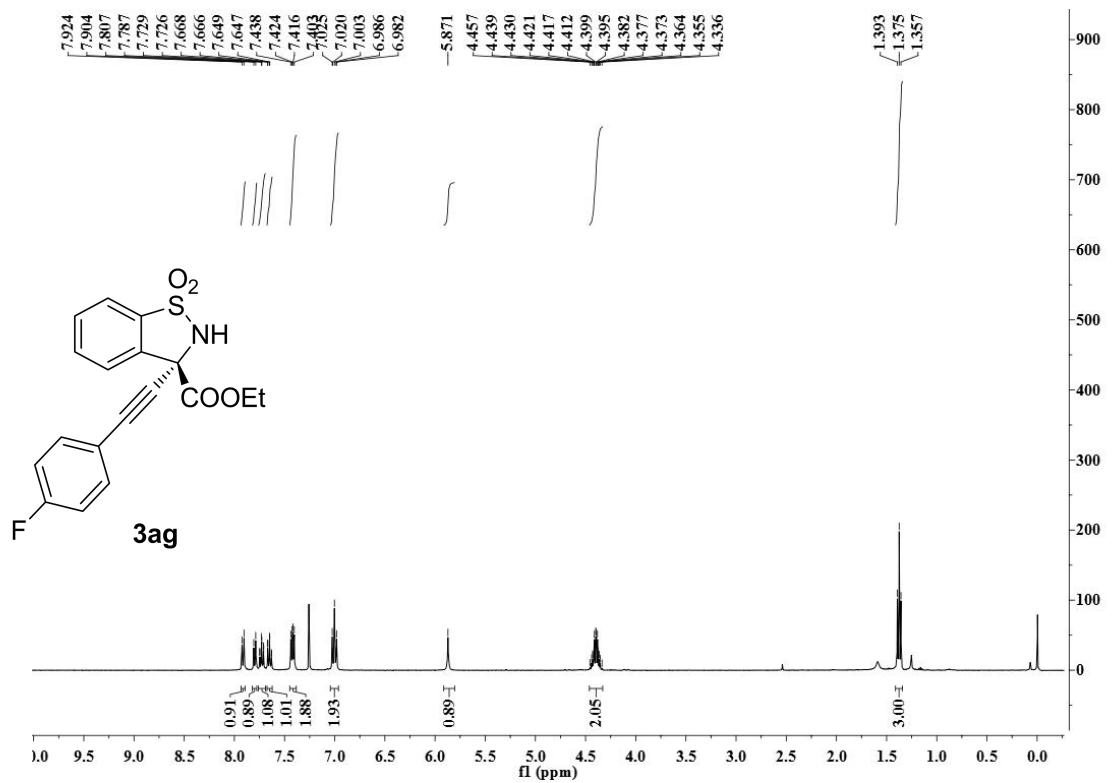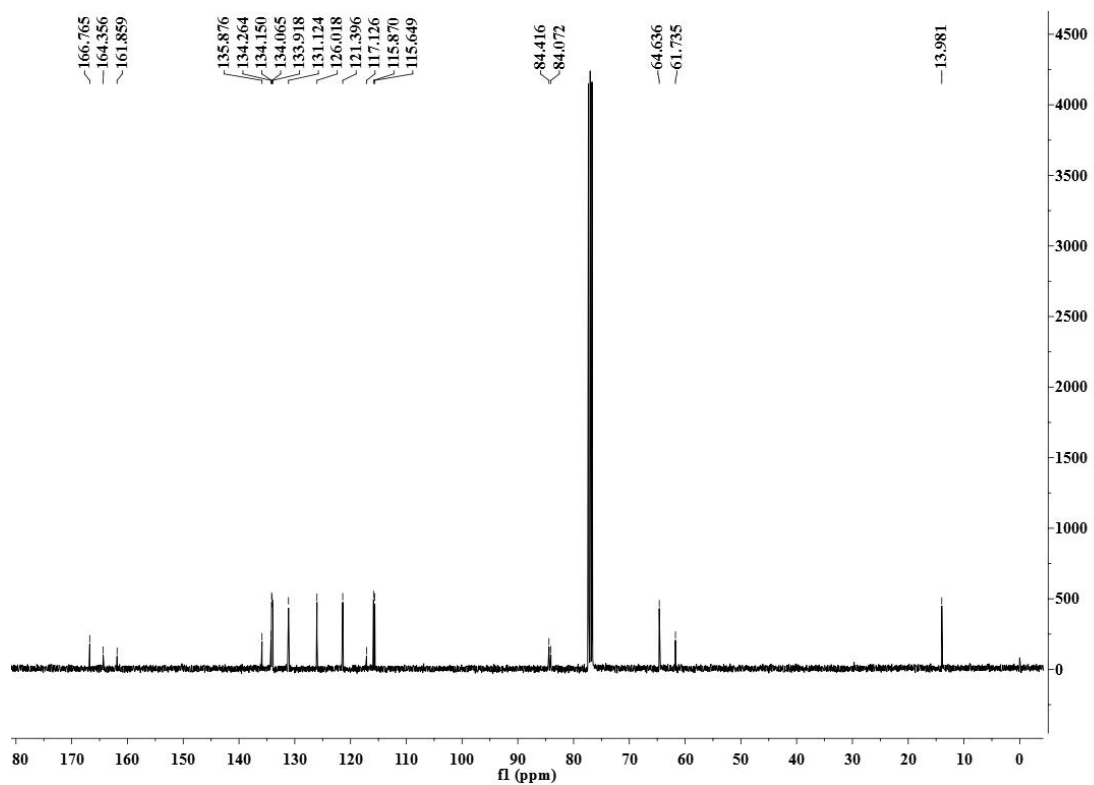

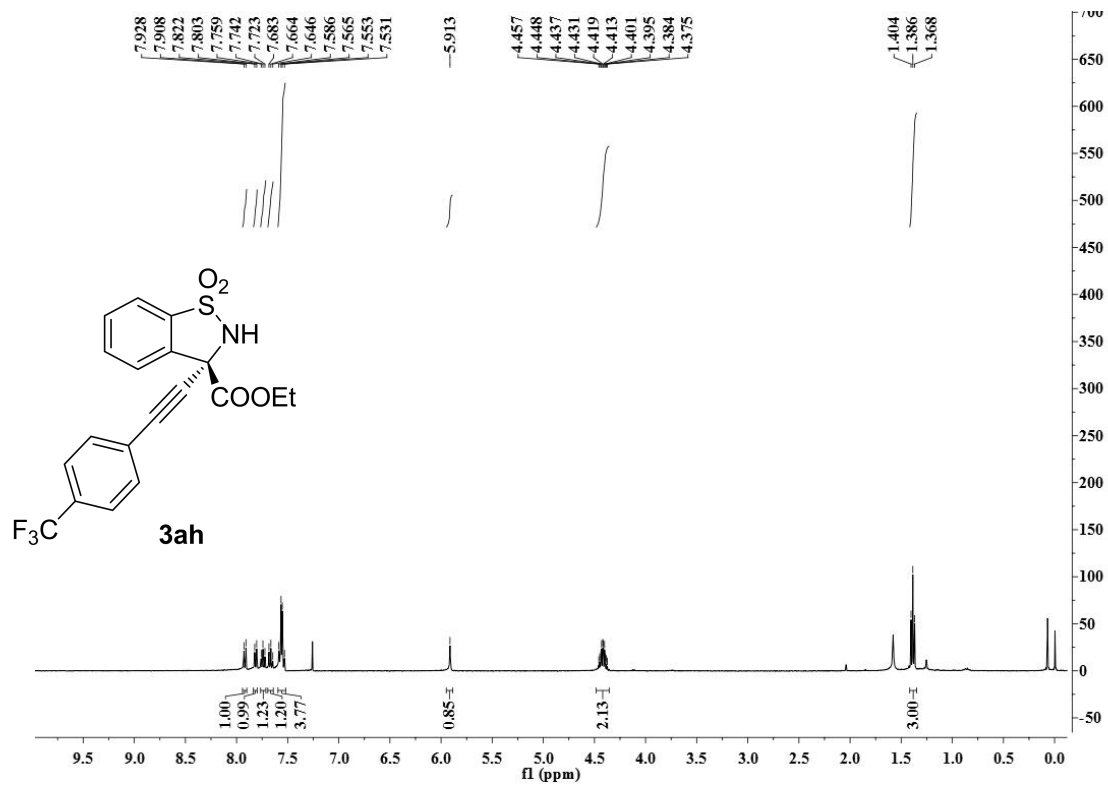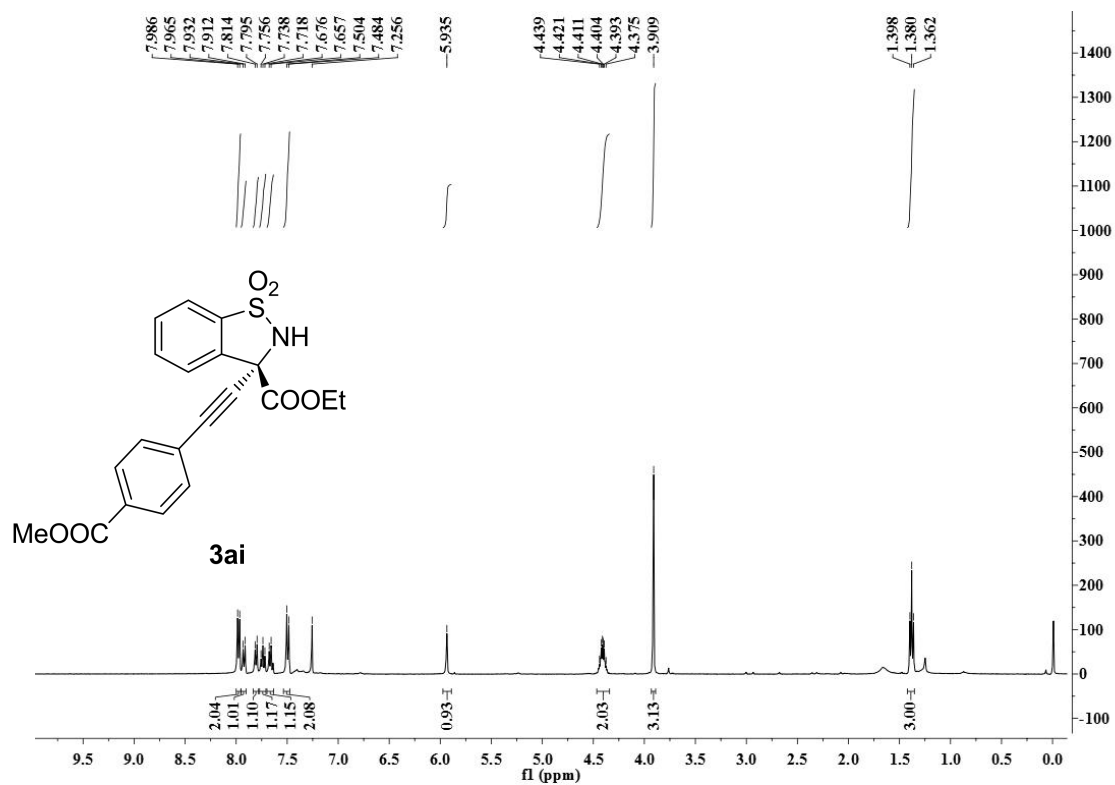



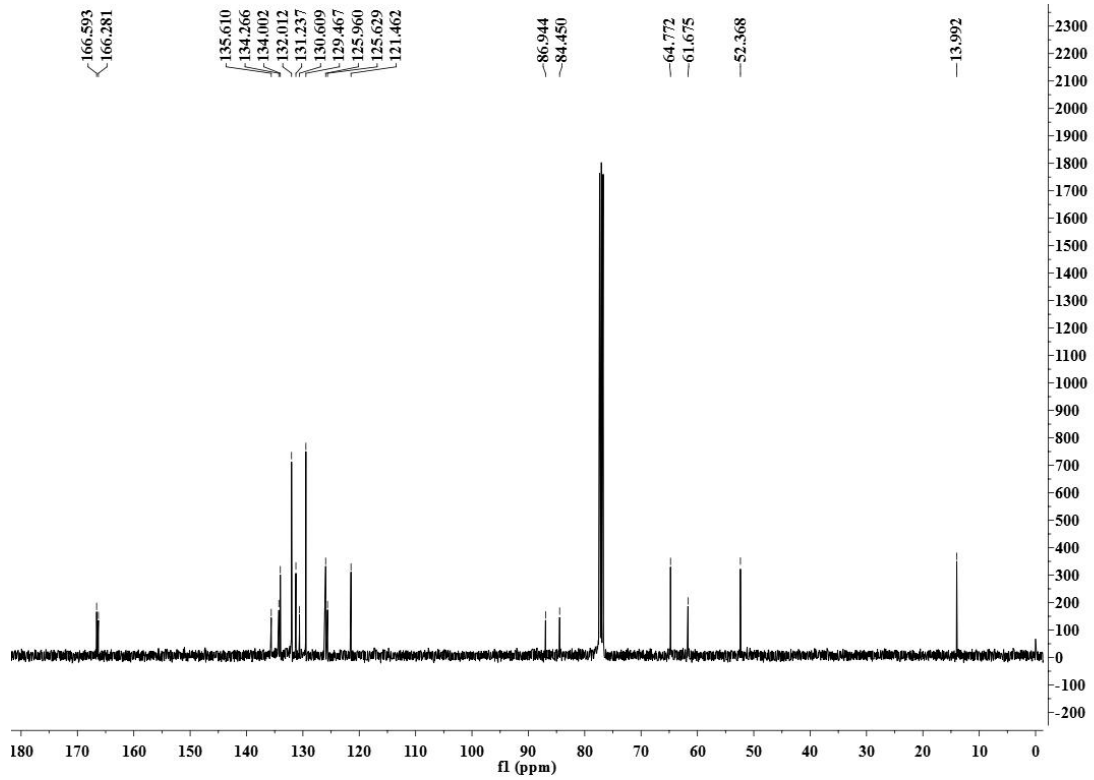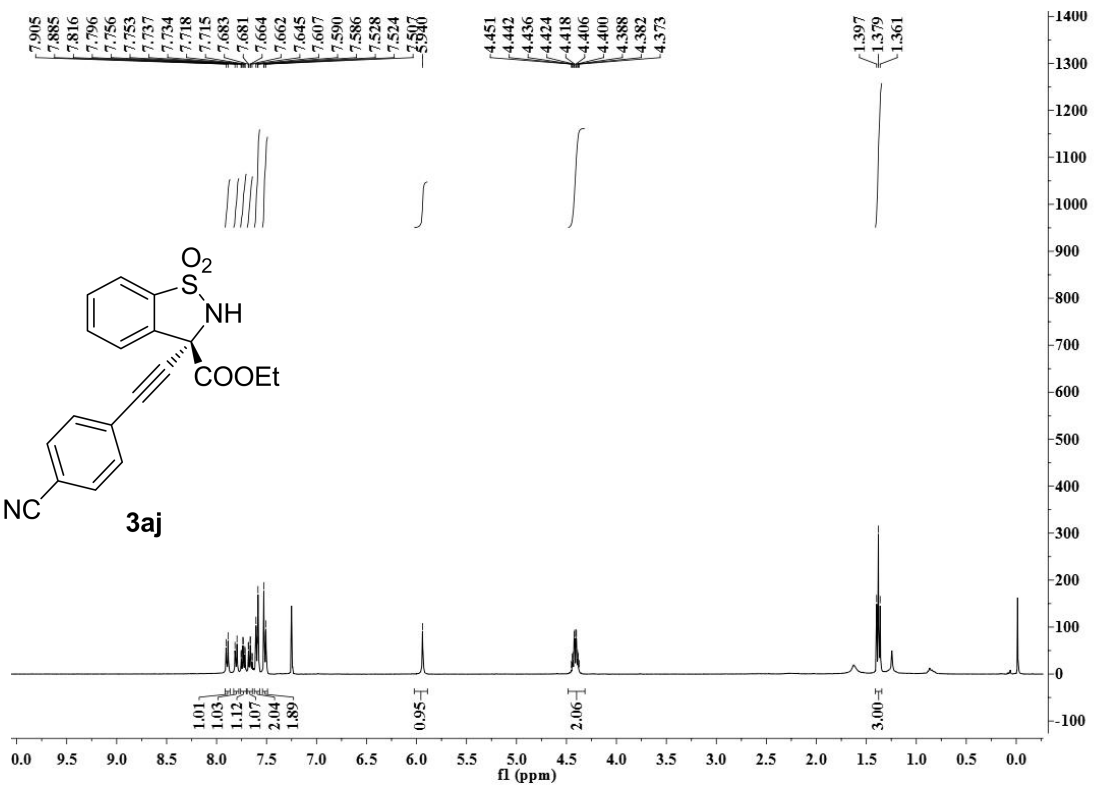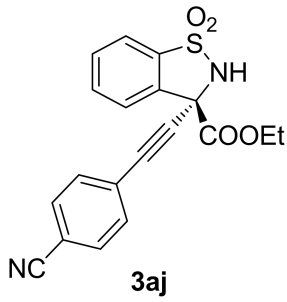

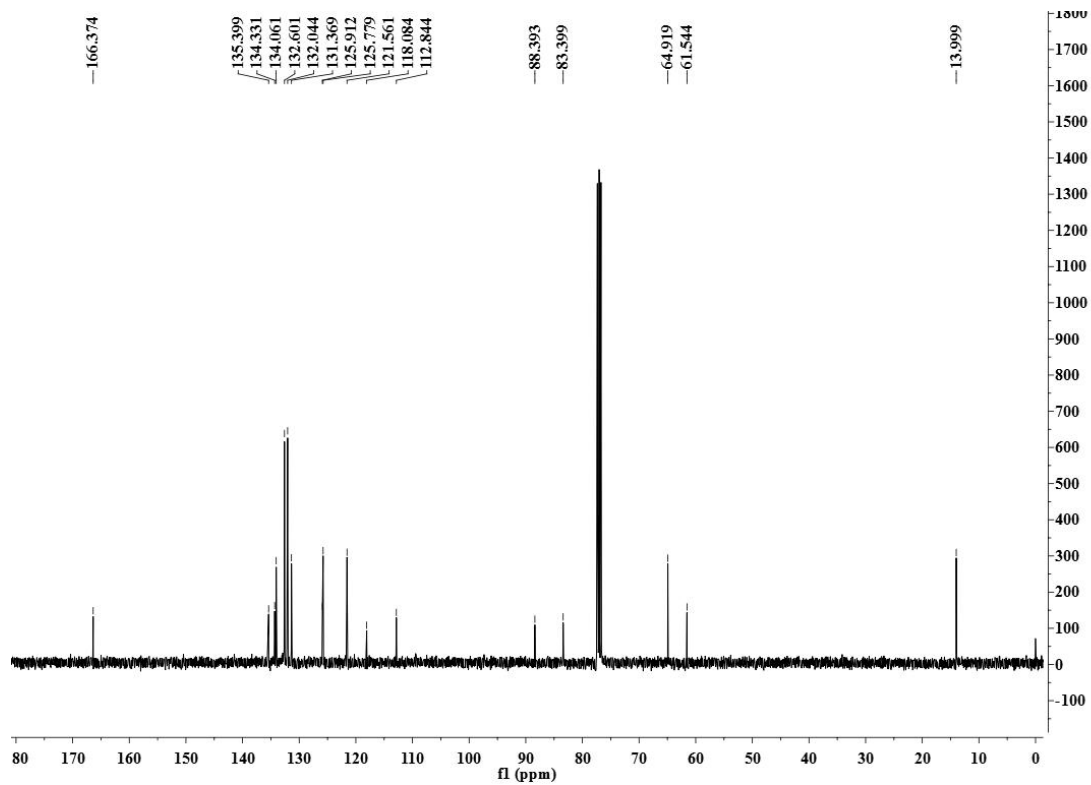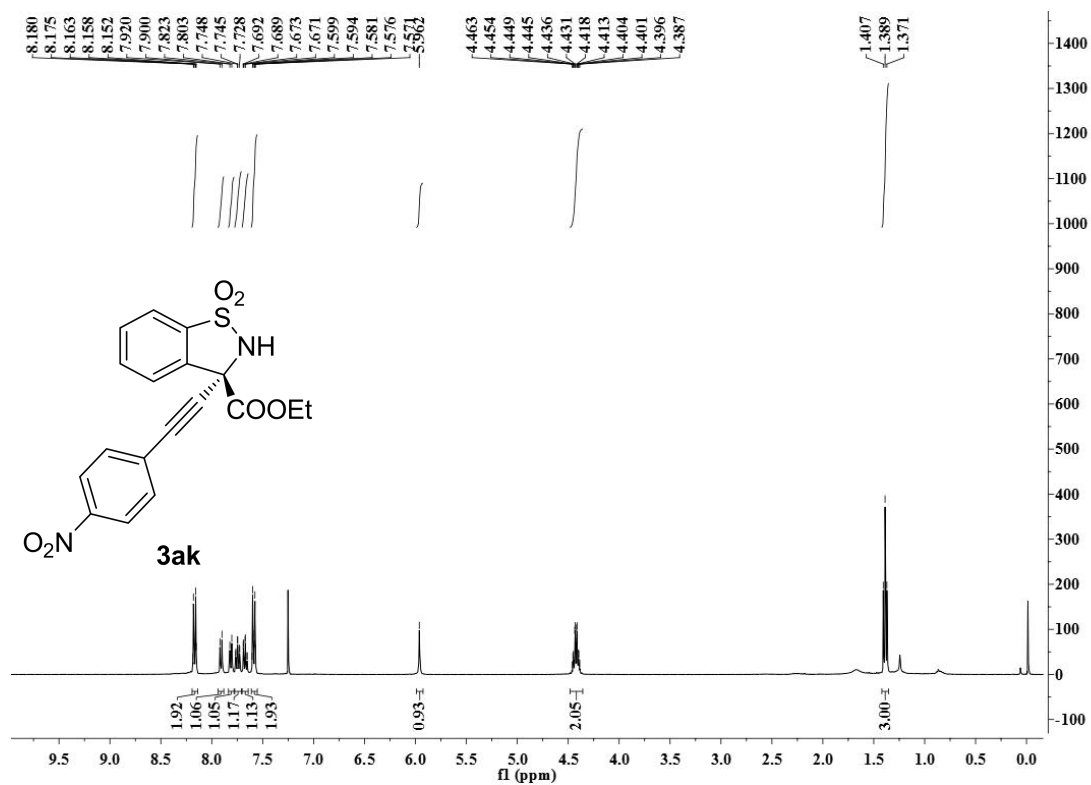

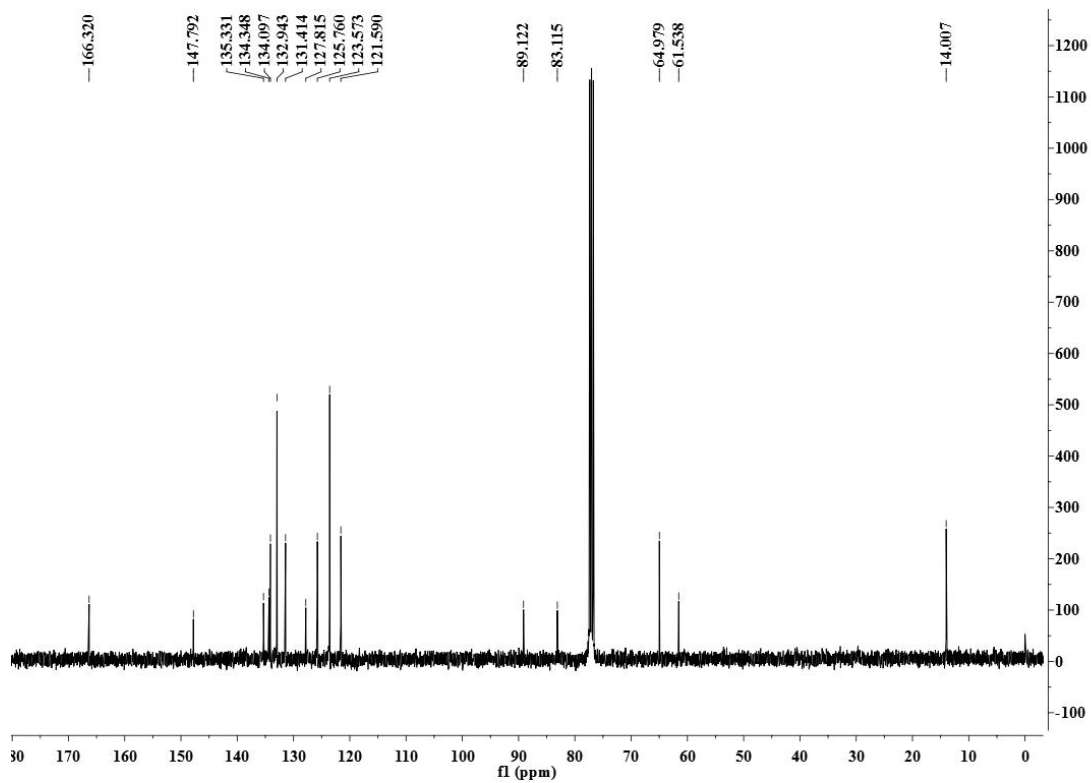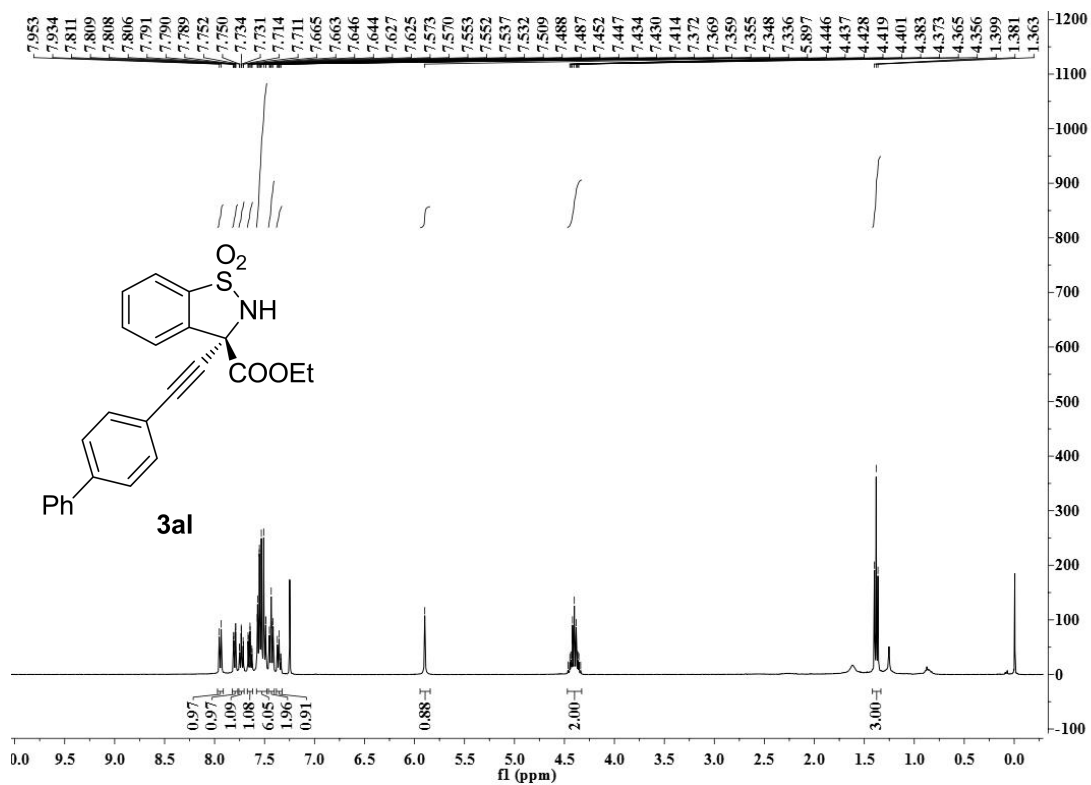

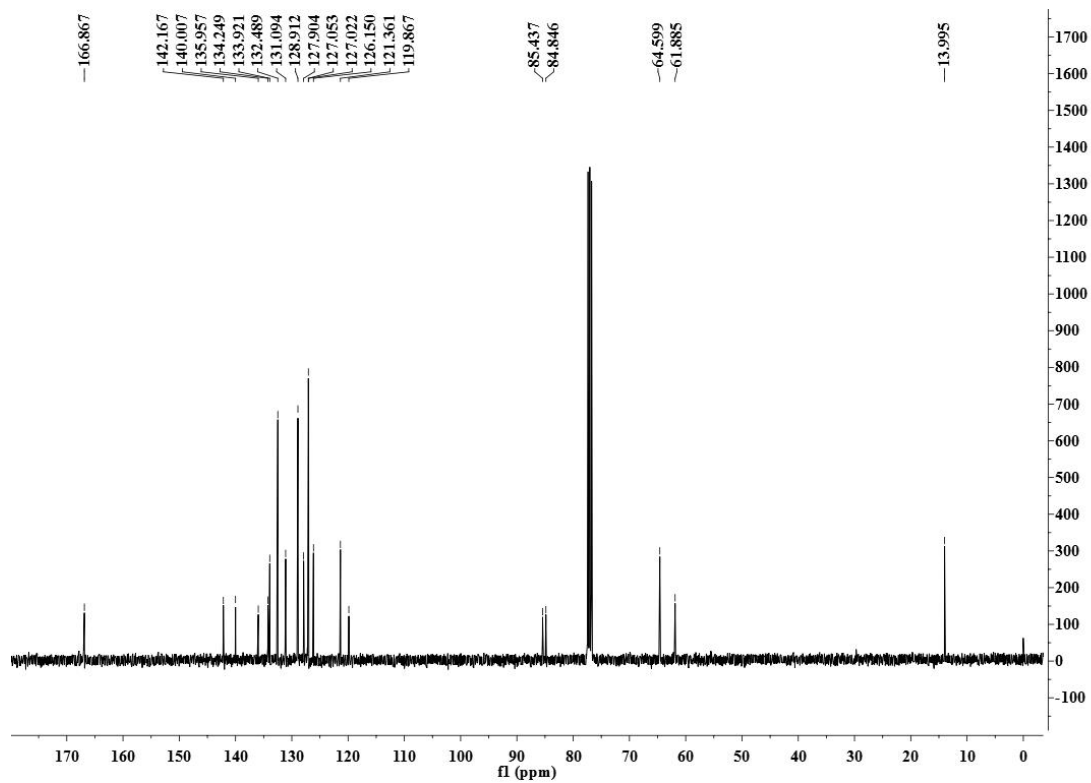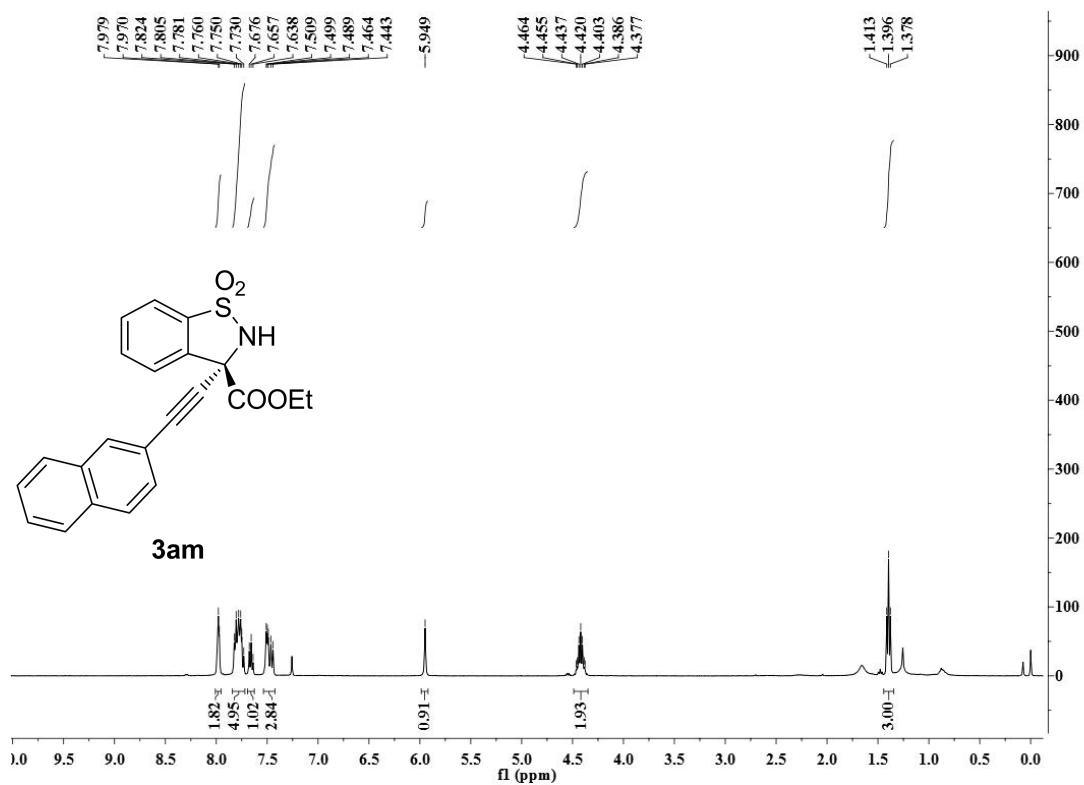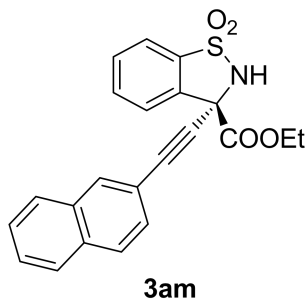

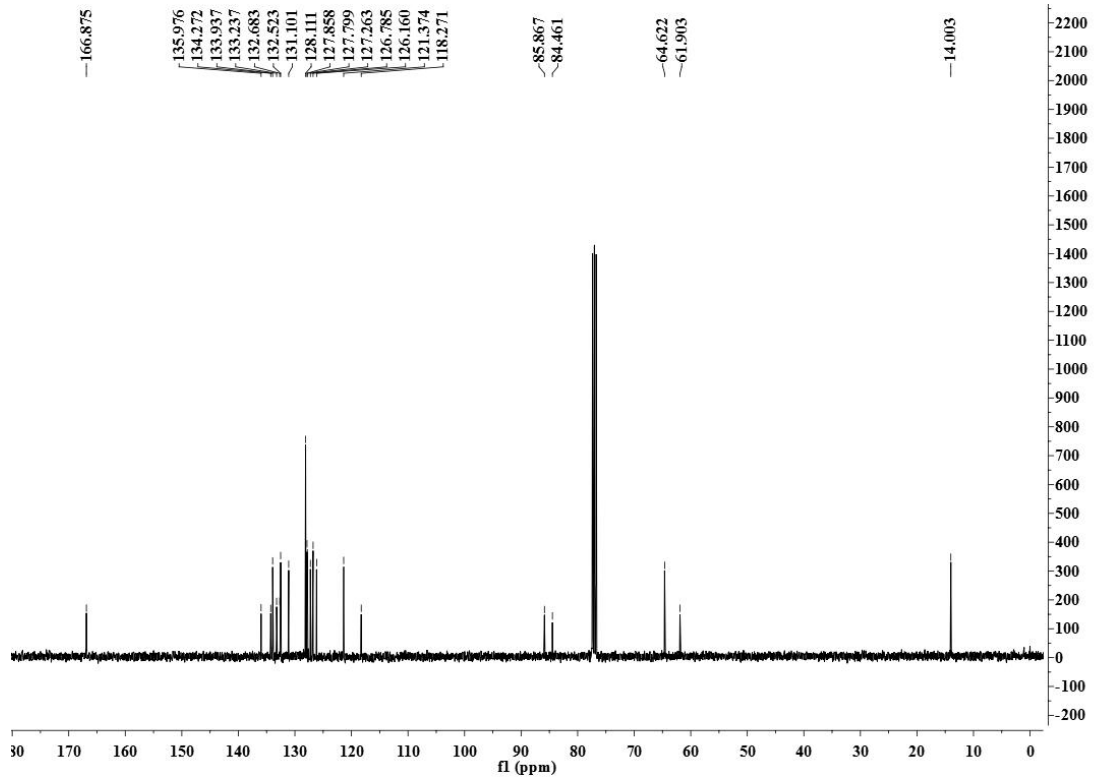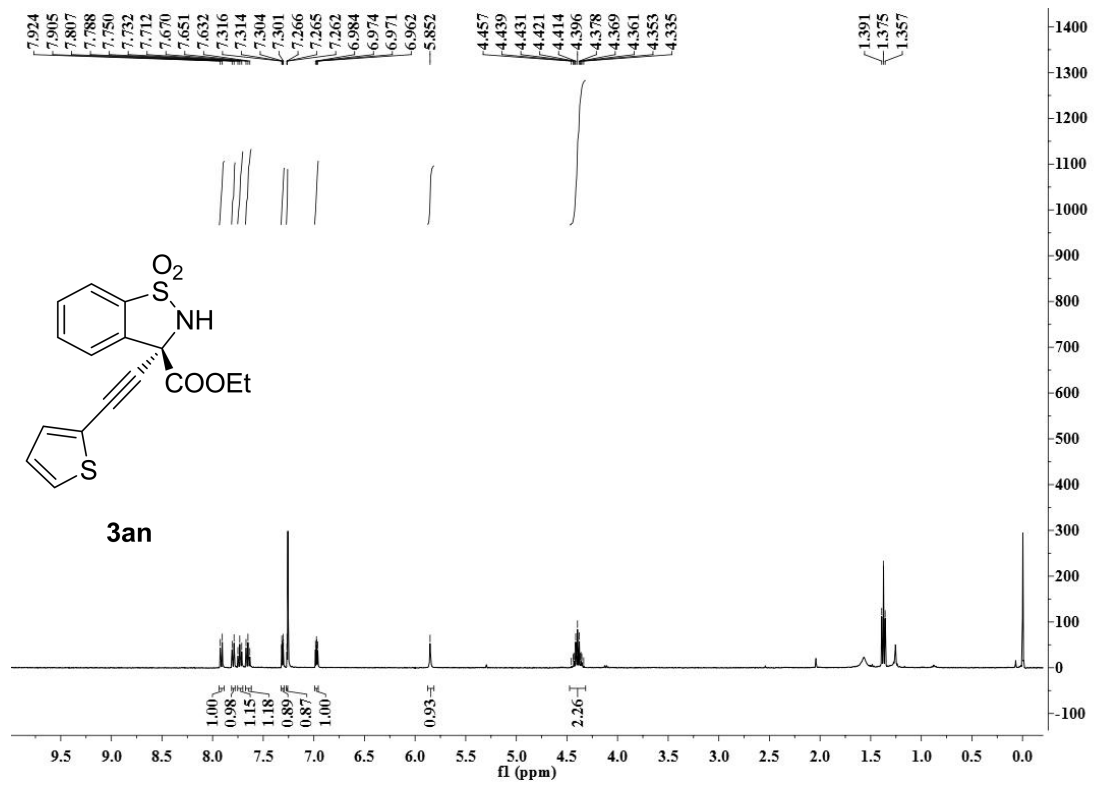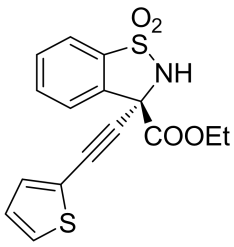

3an

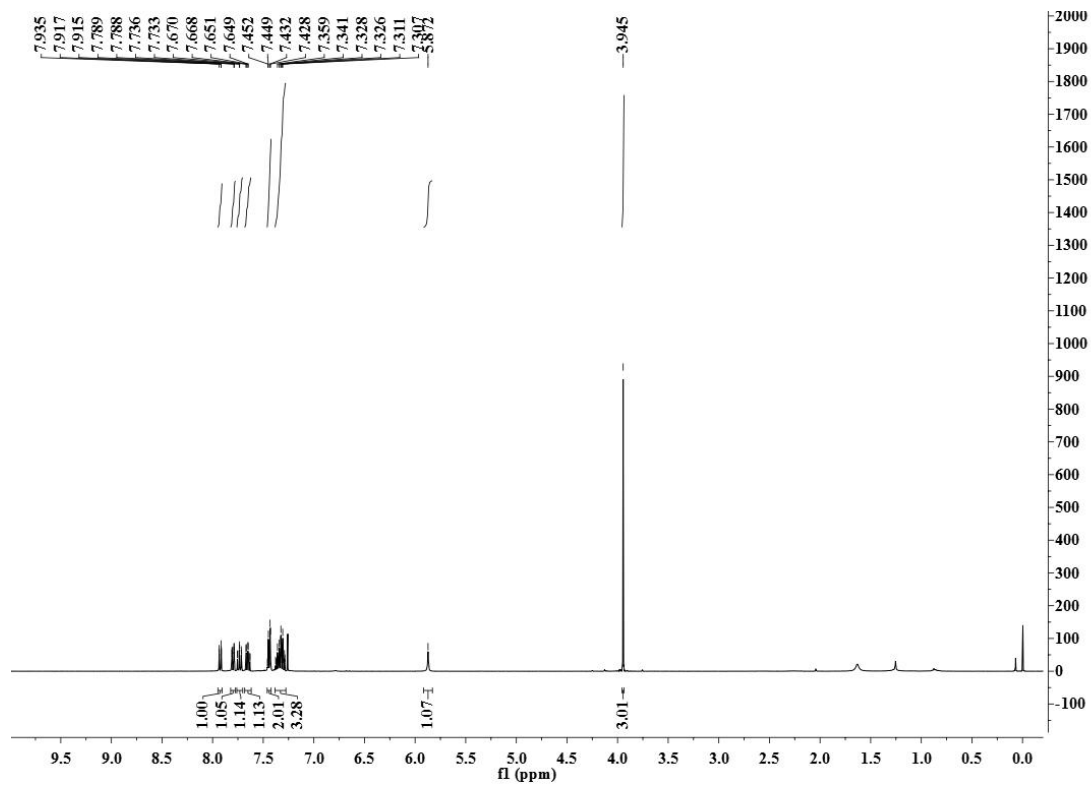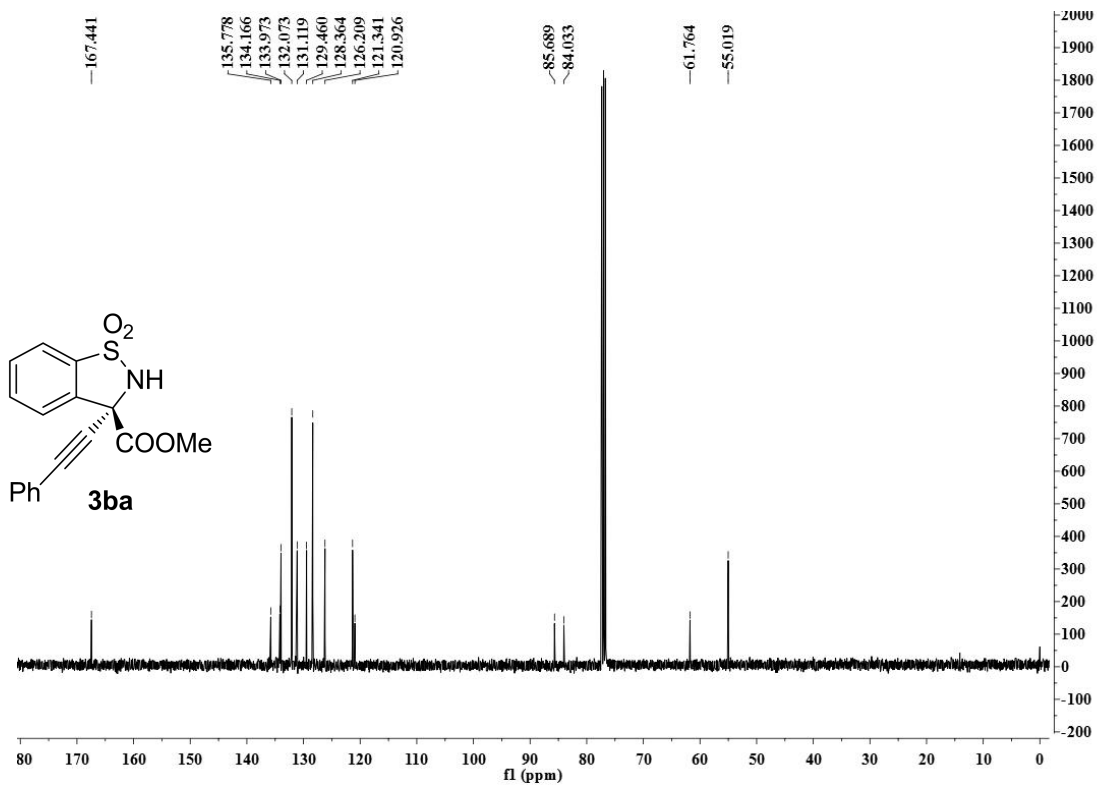

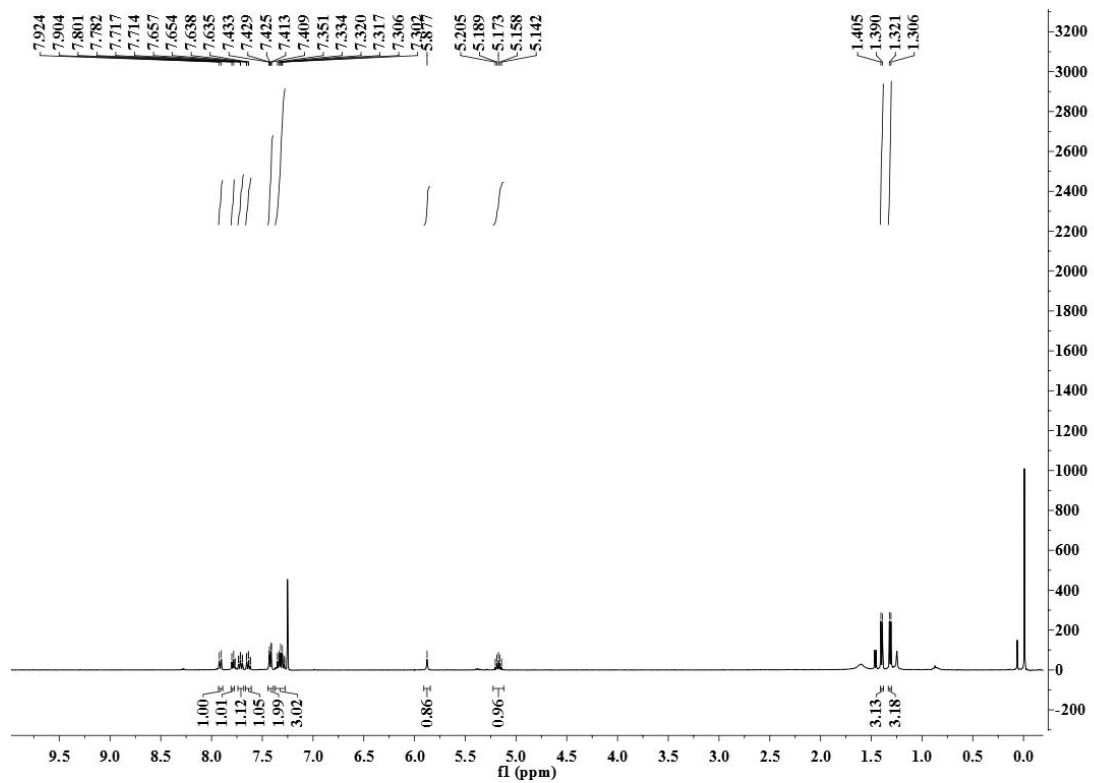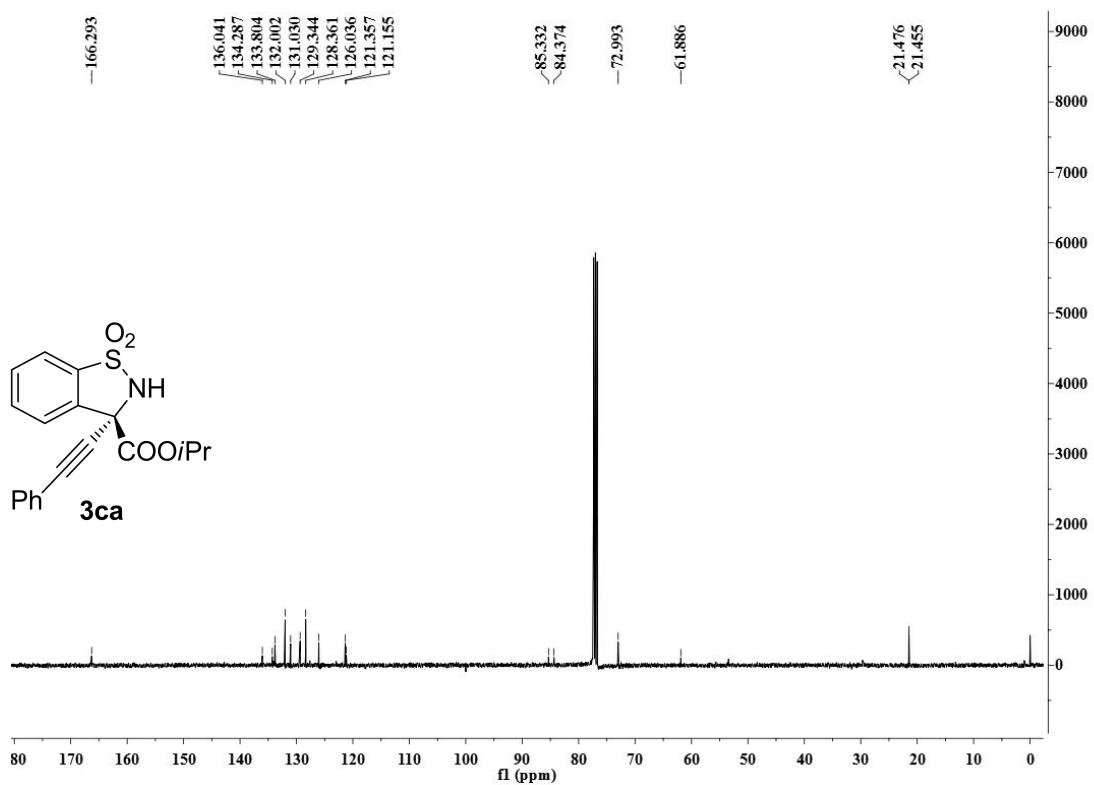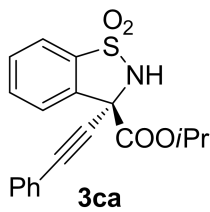

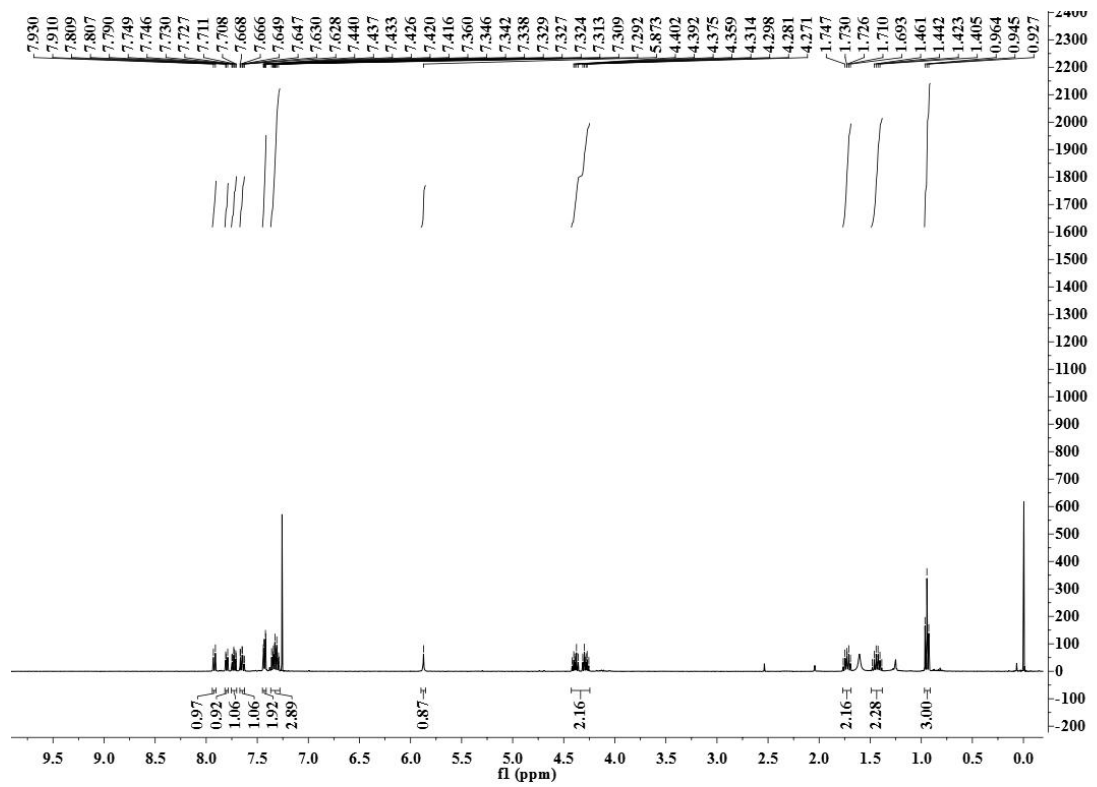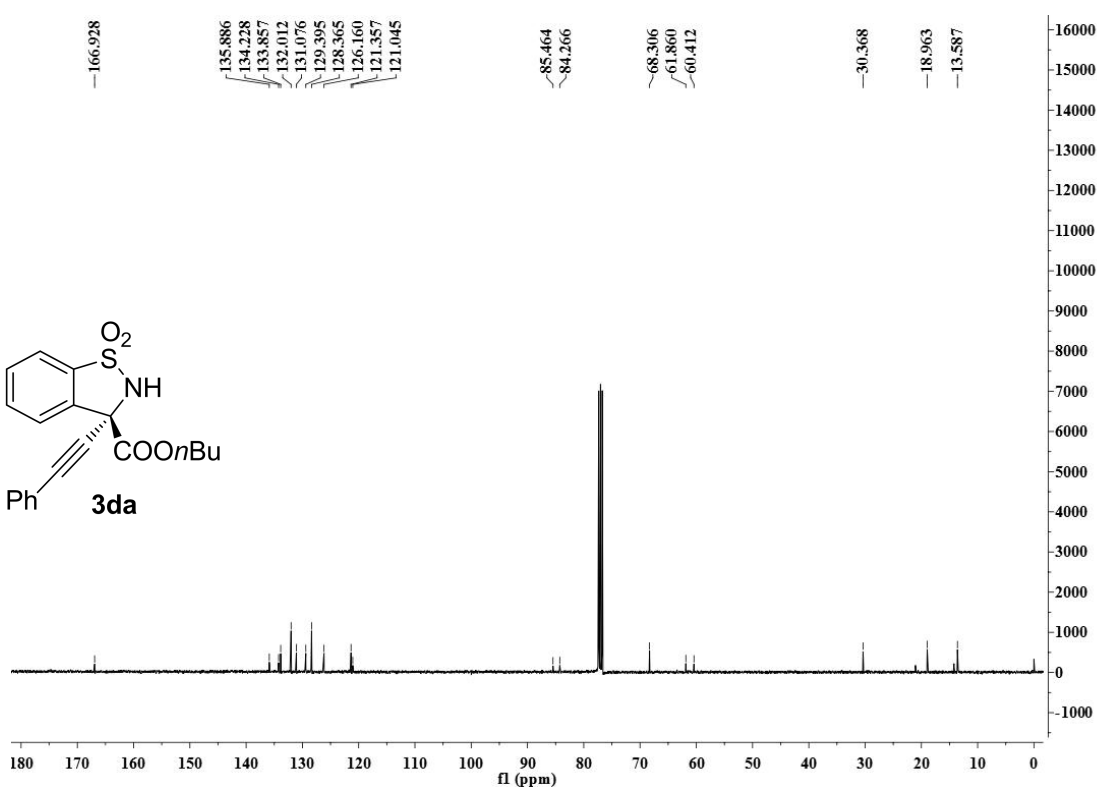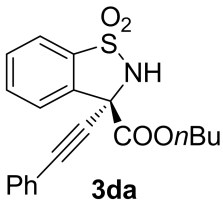



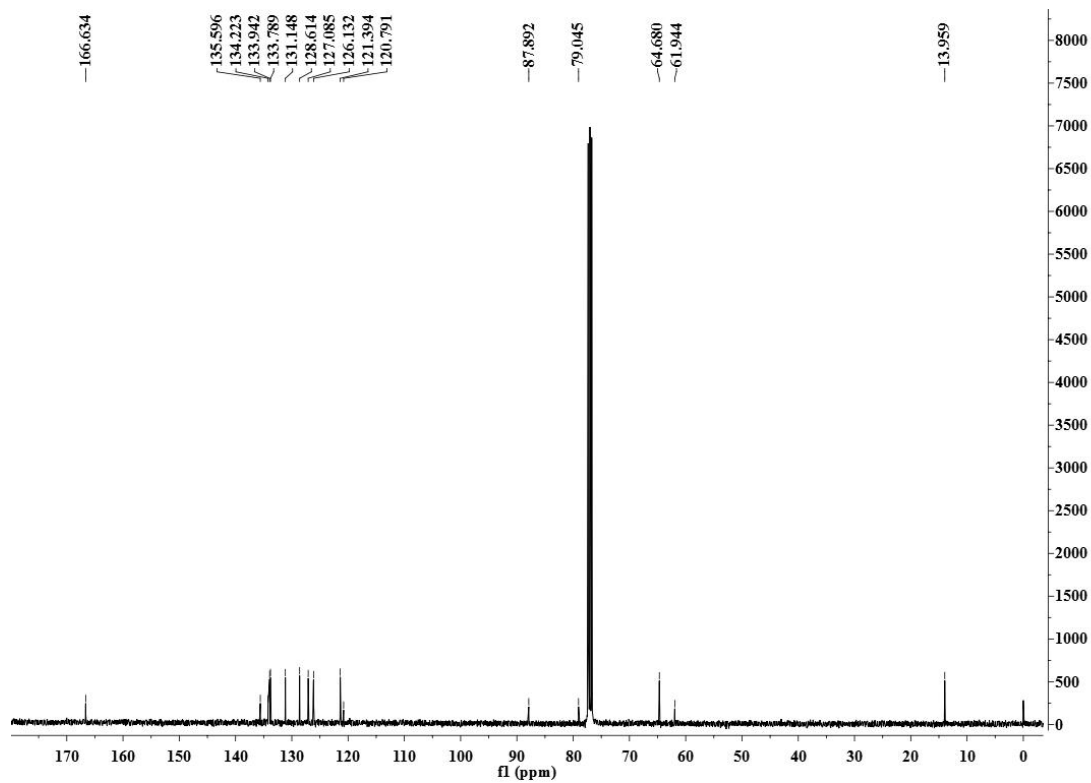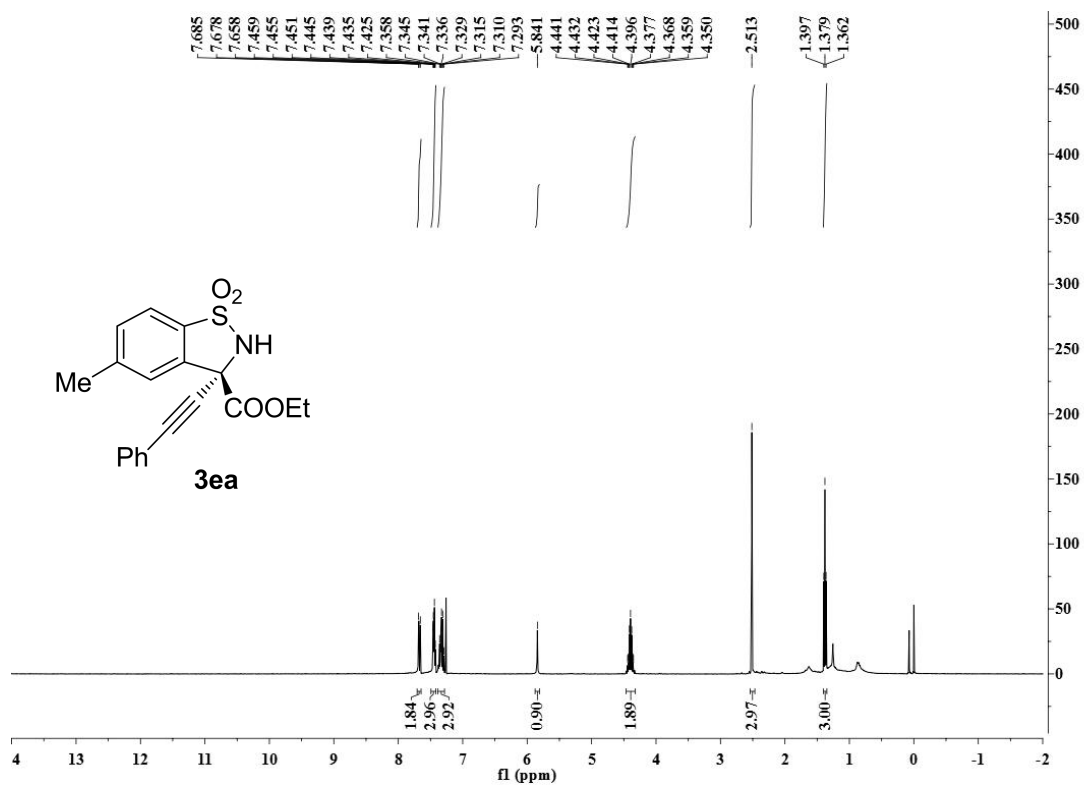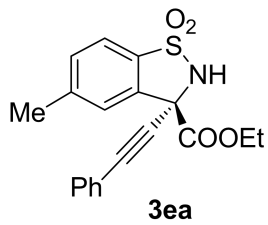

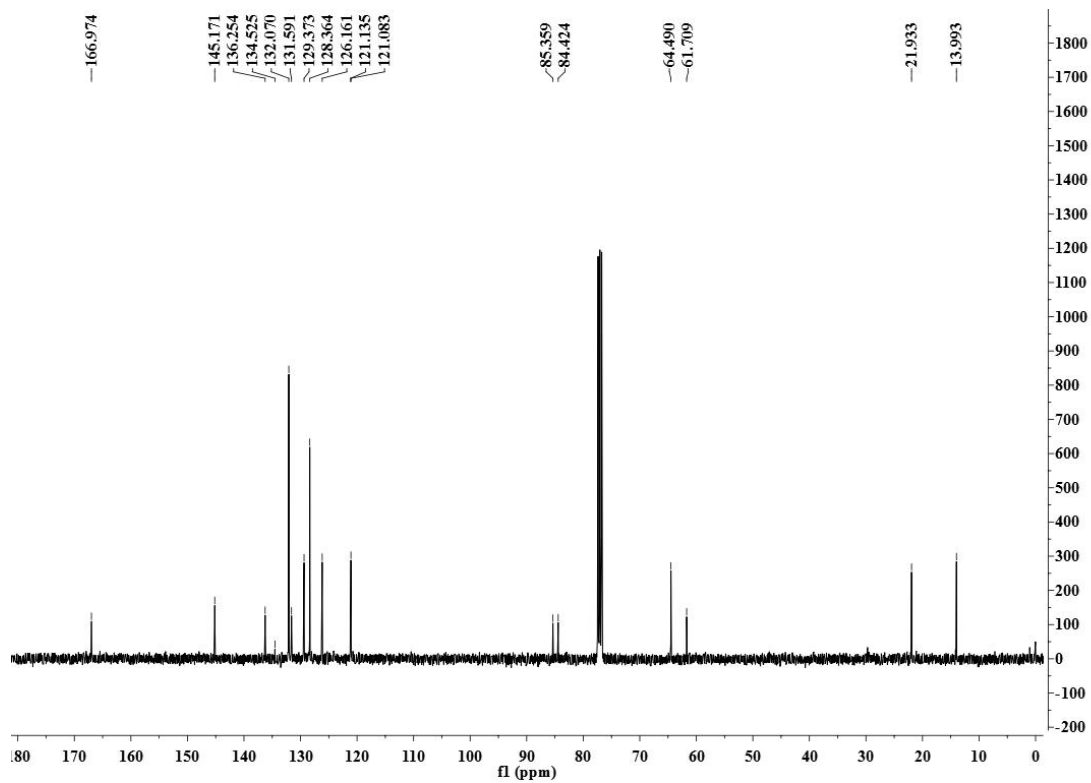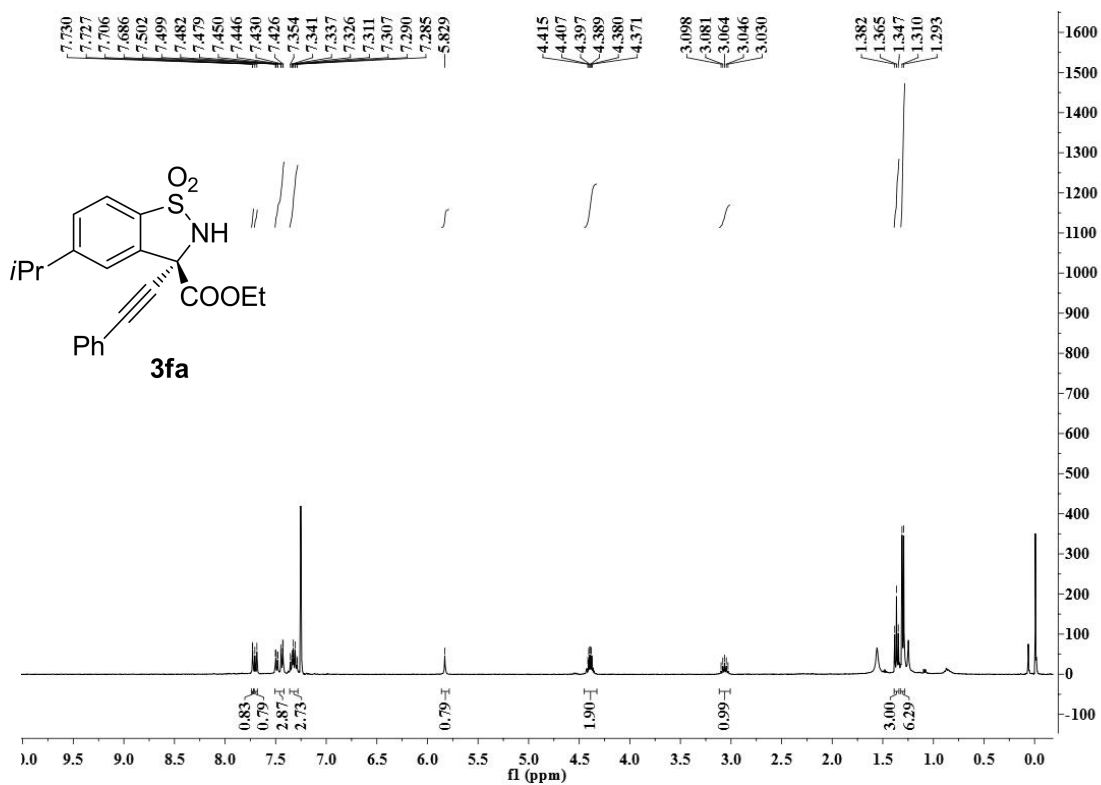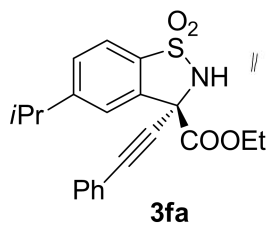

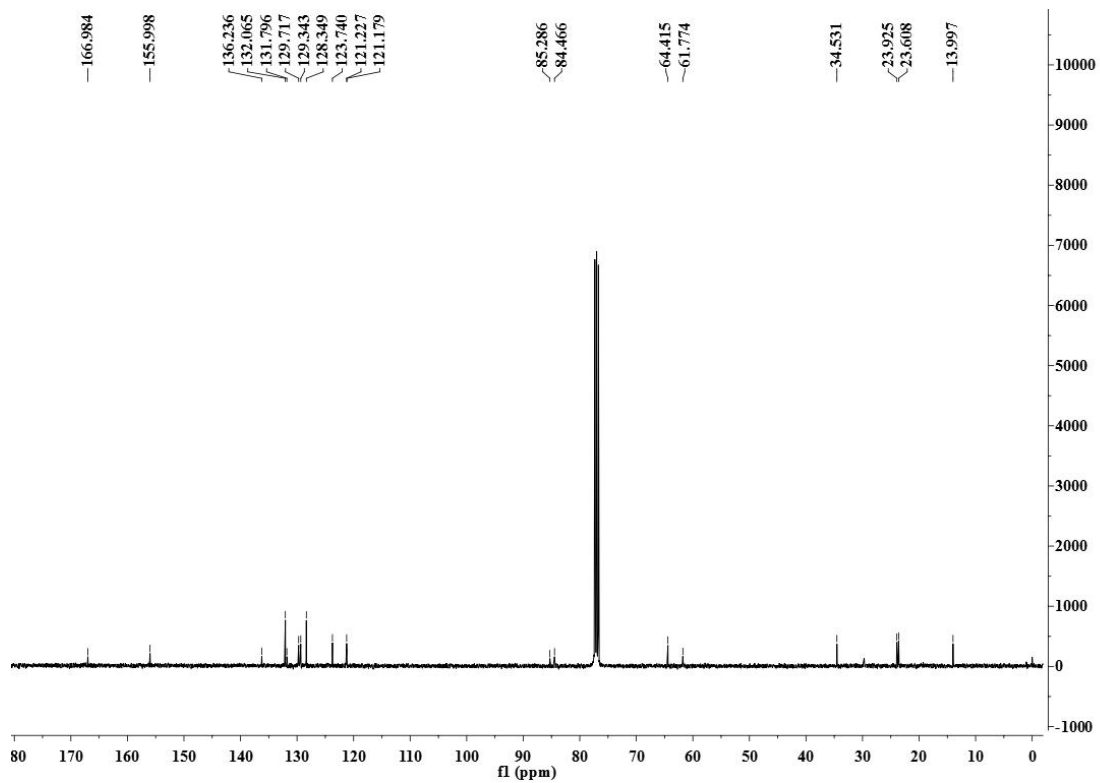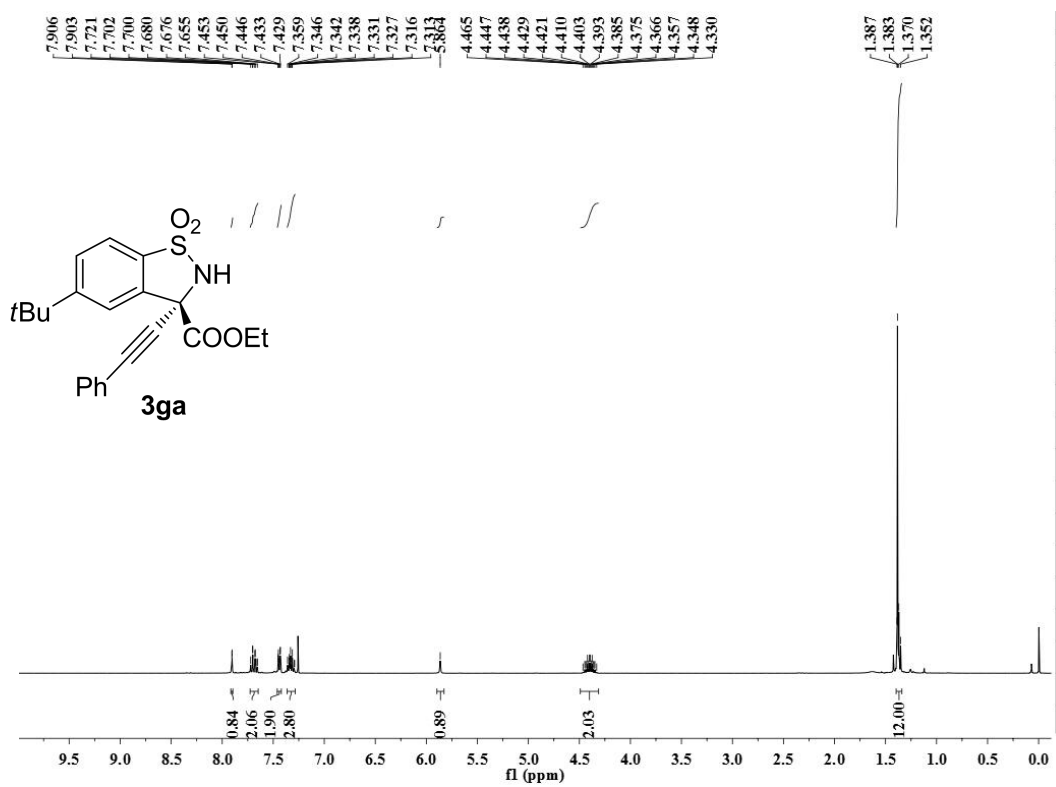

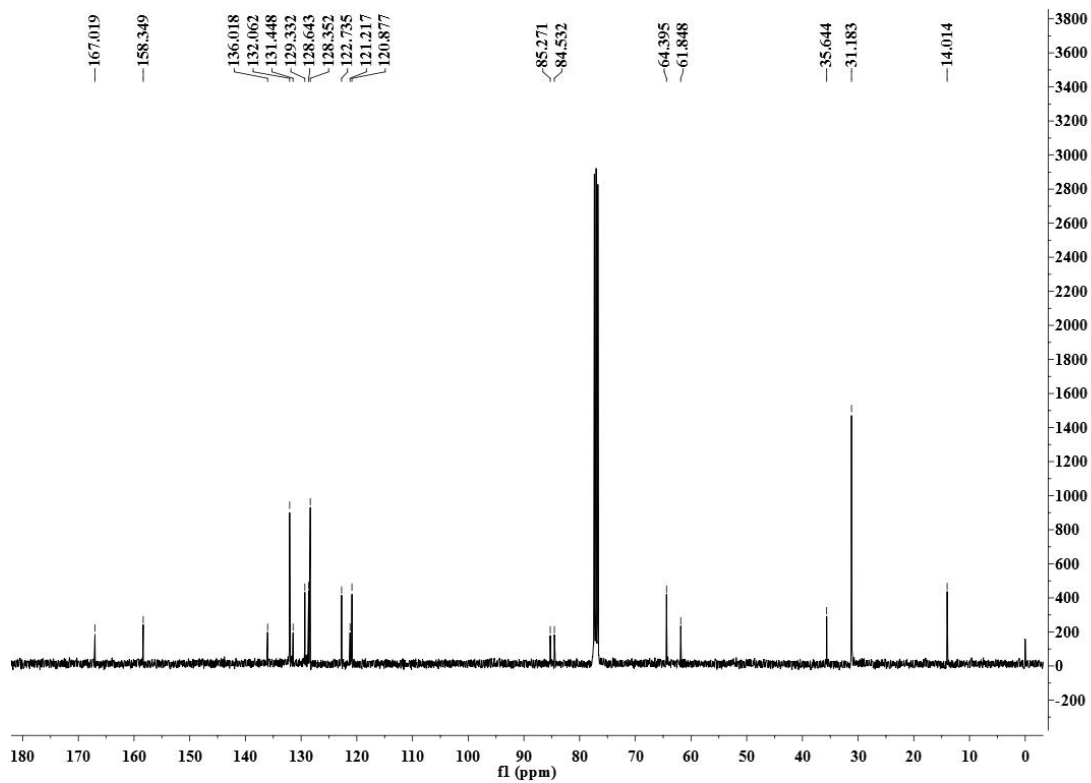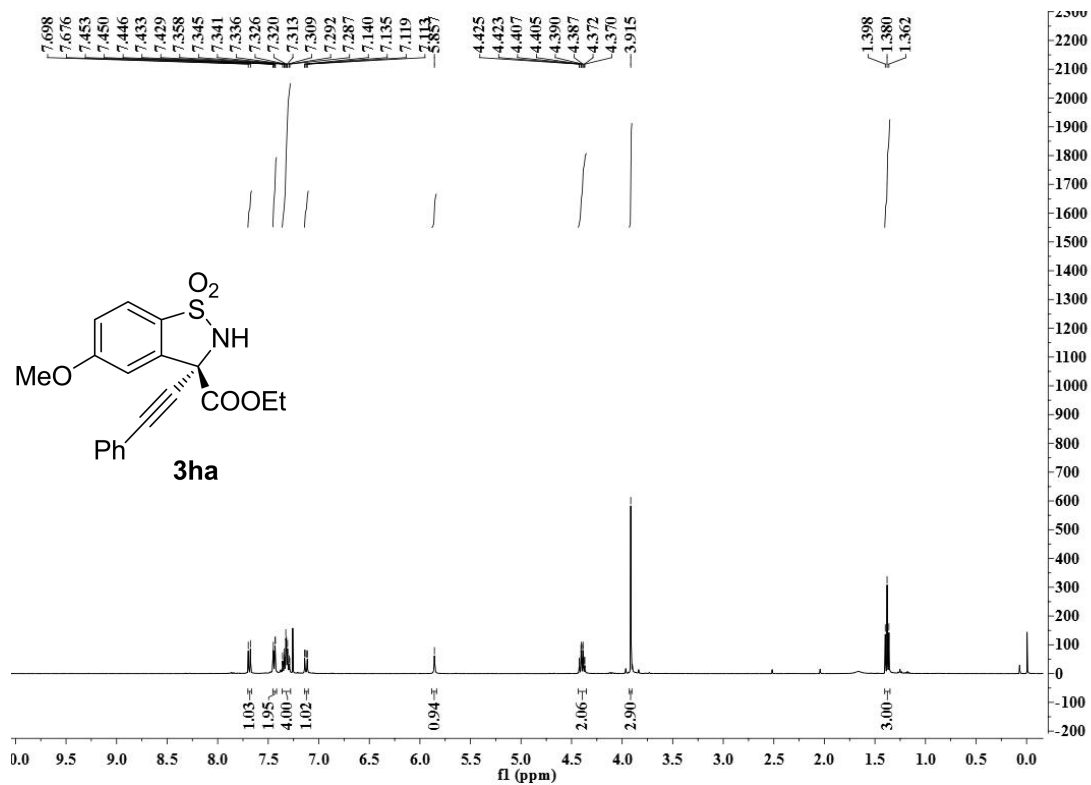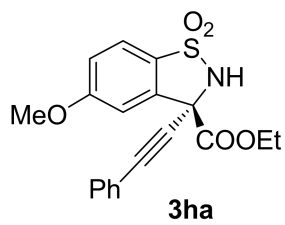

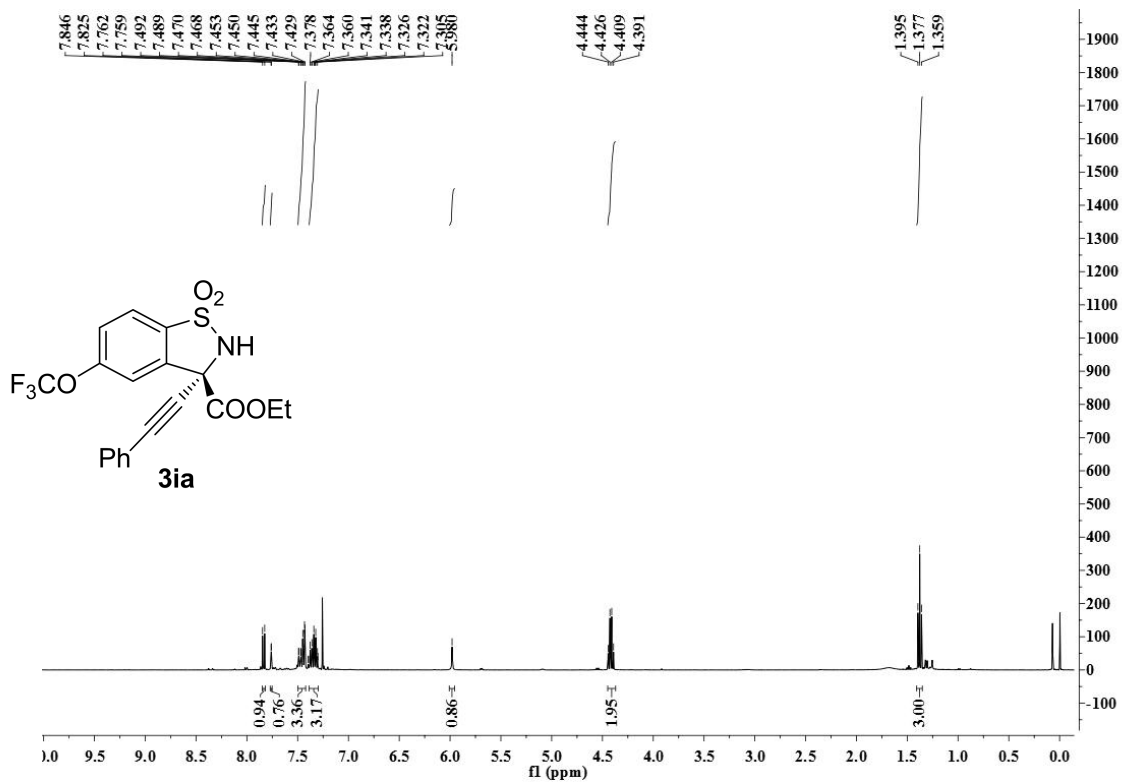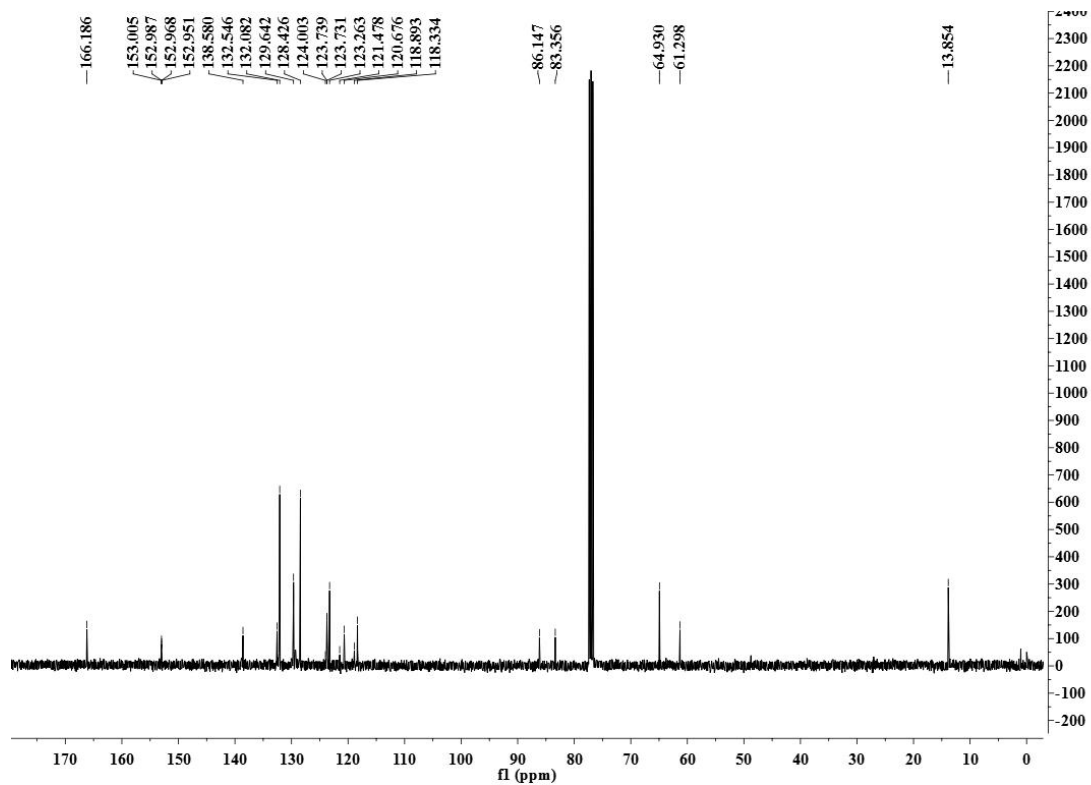

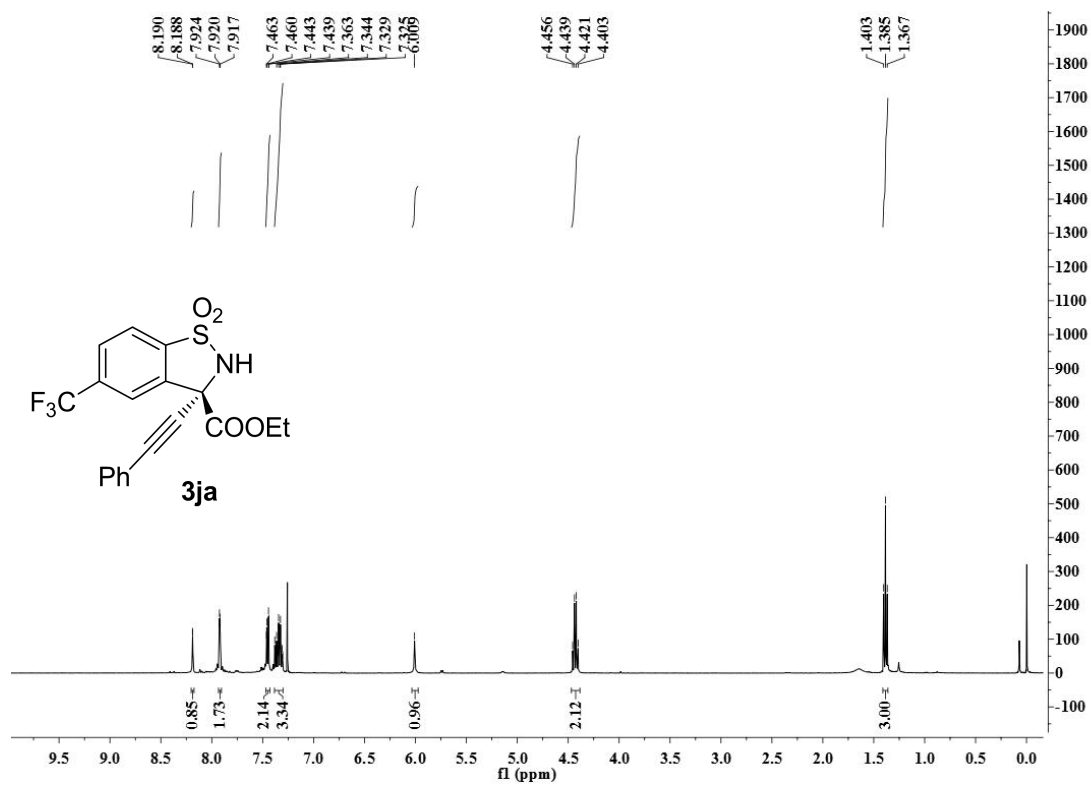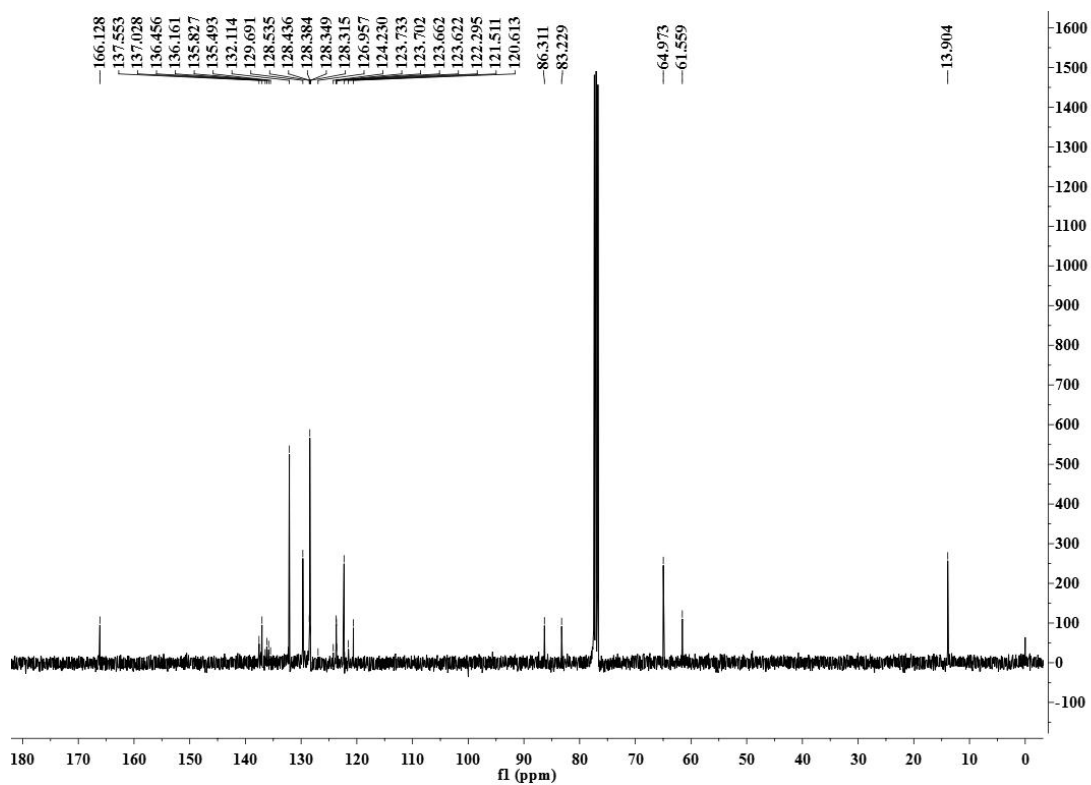

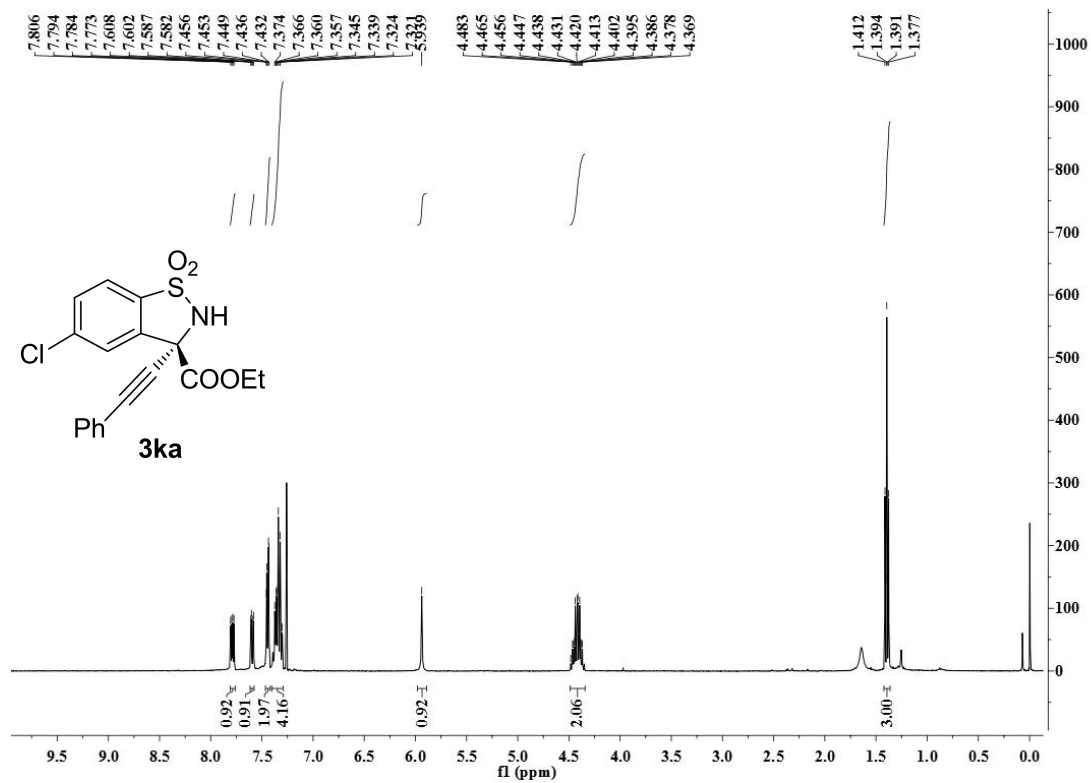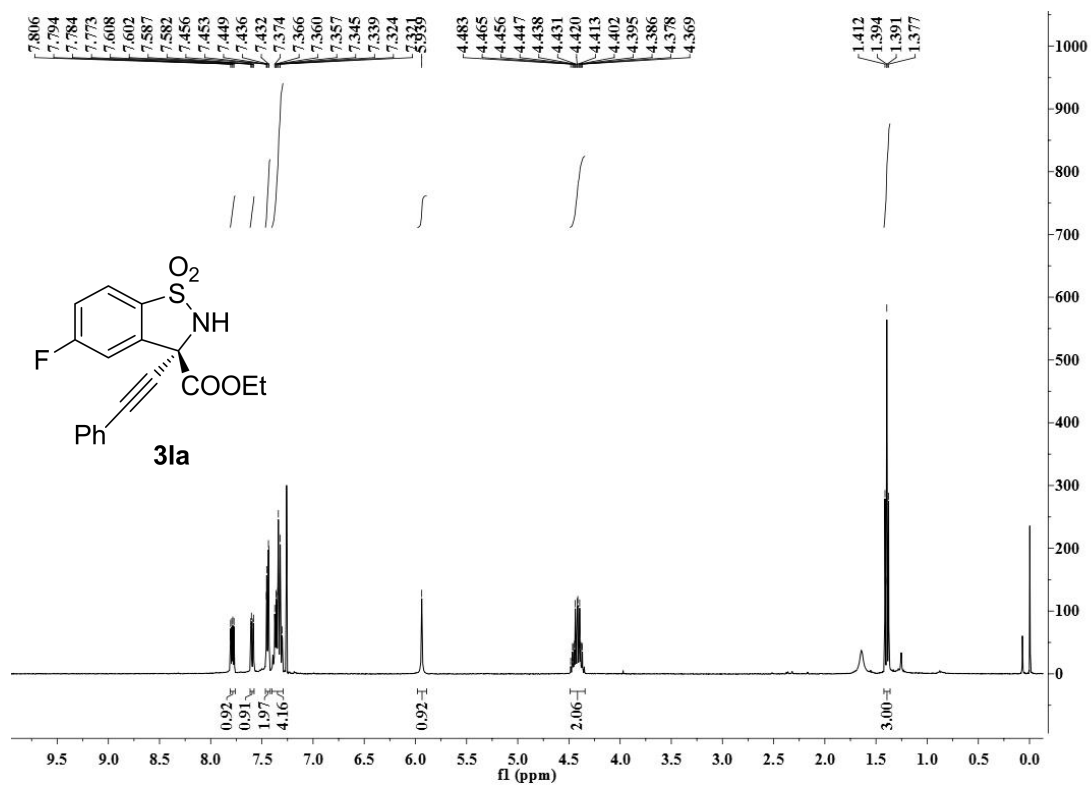

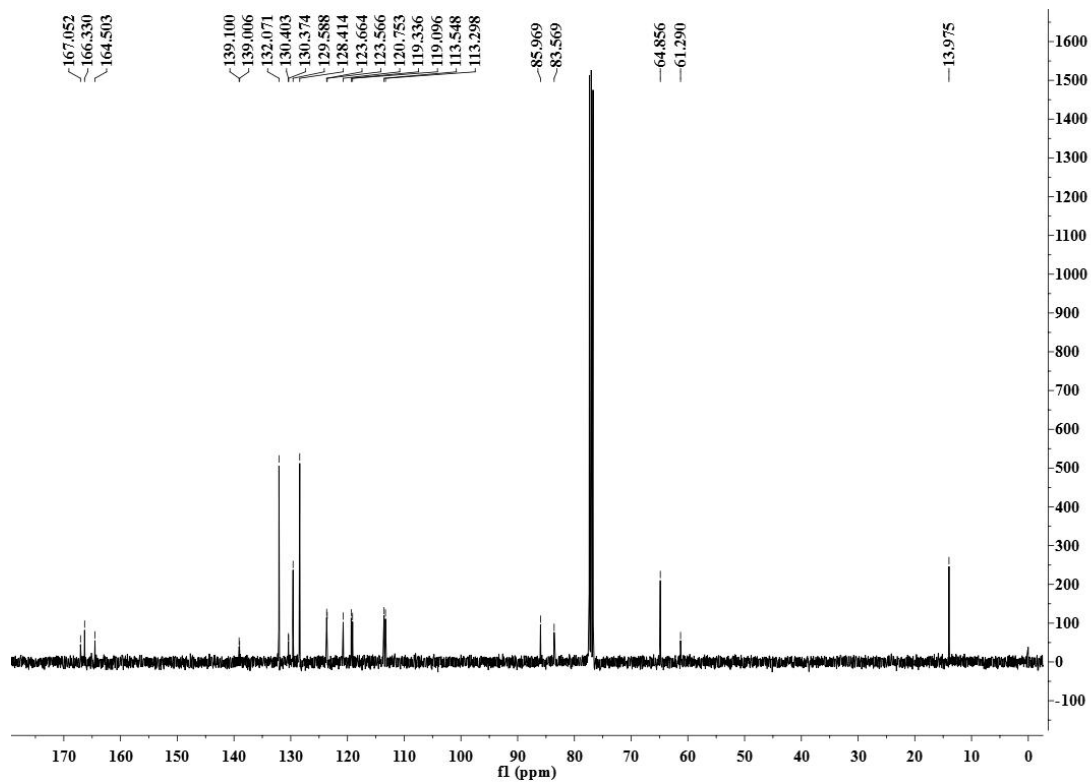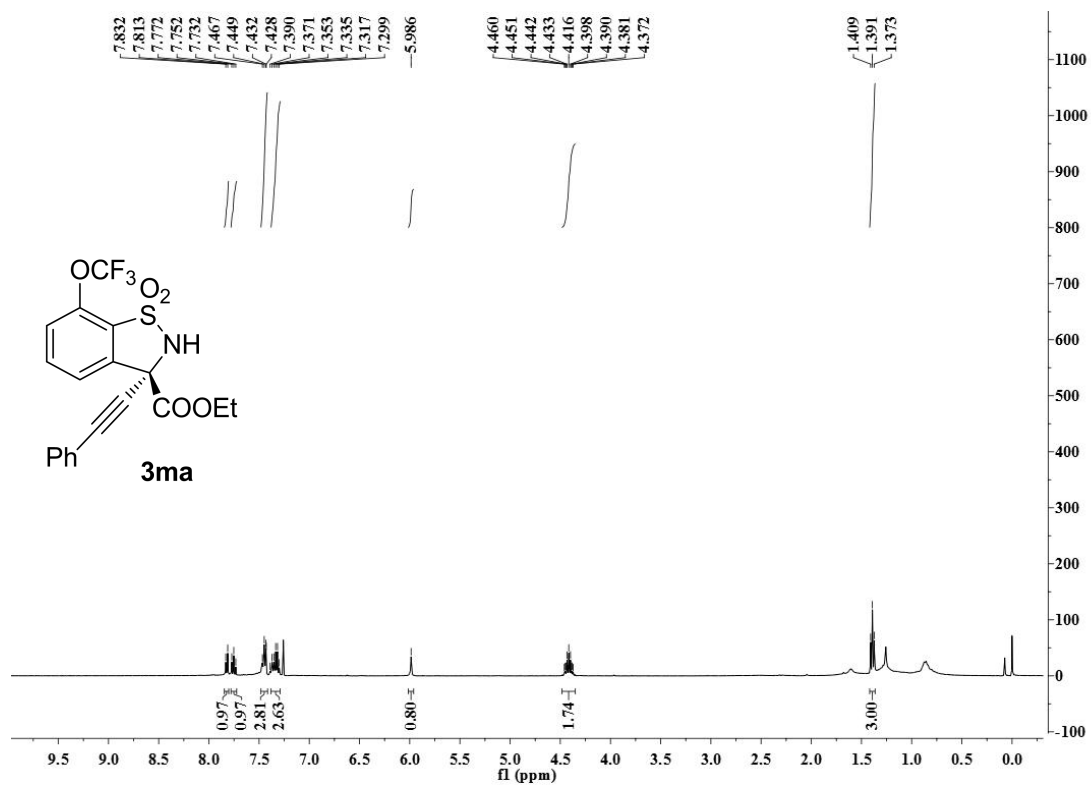



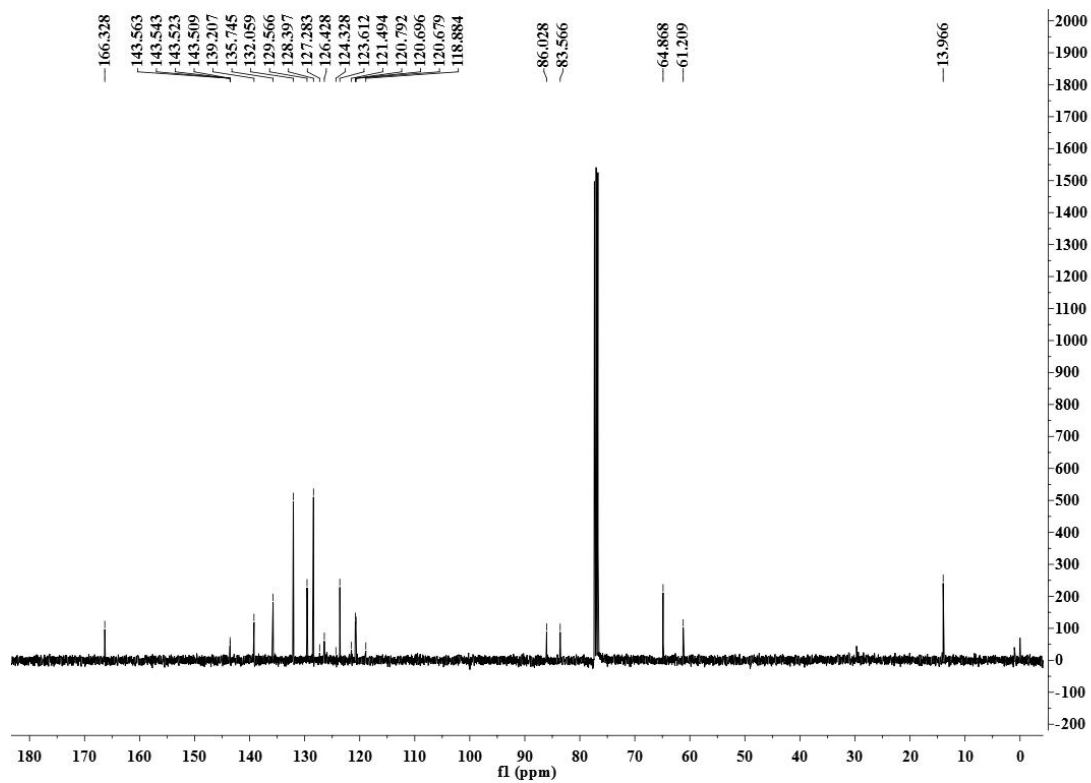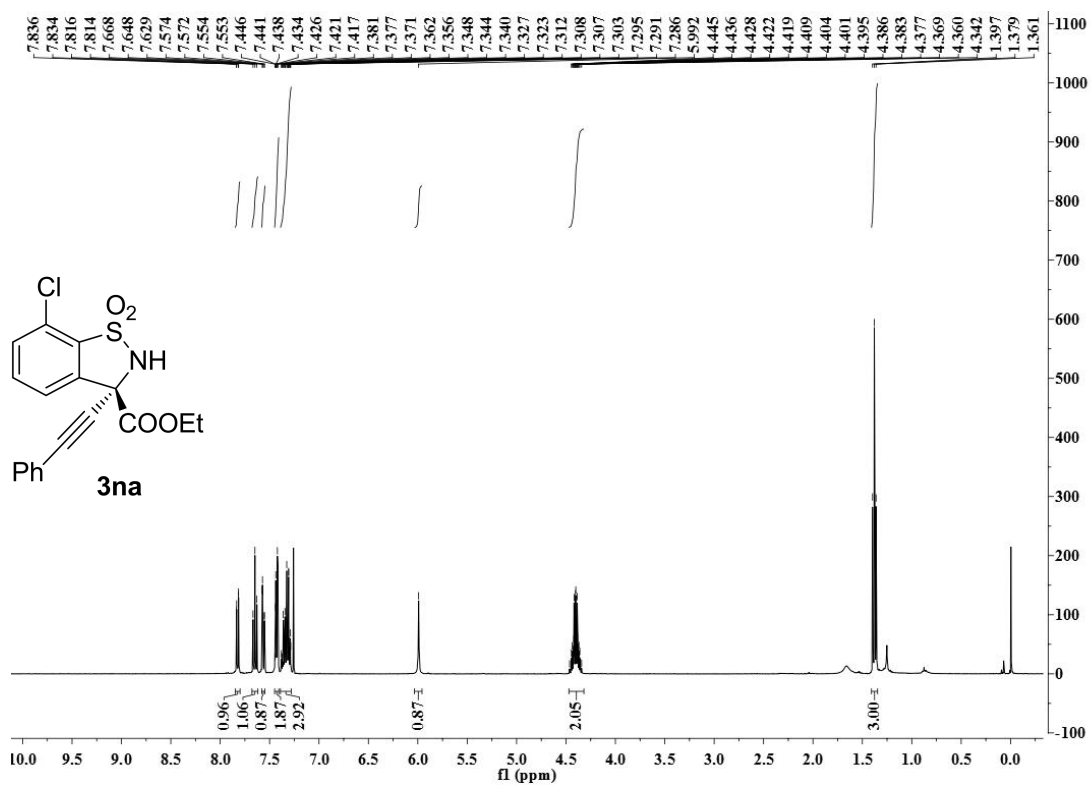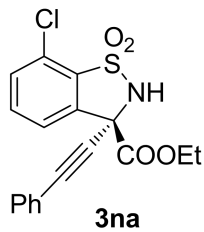

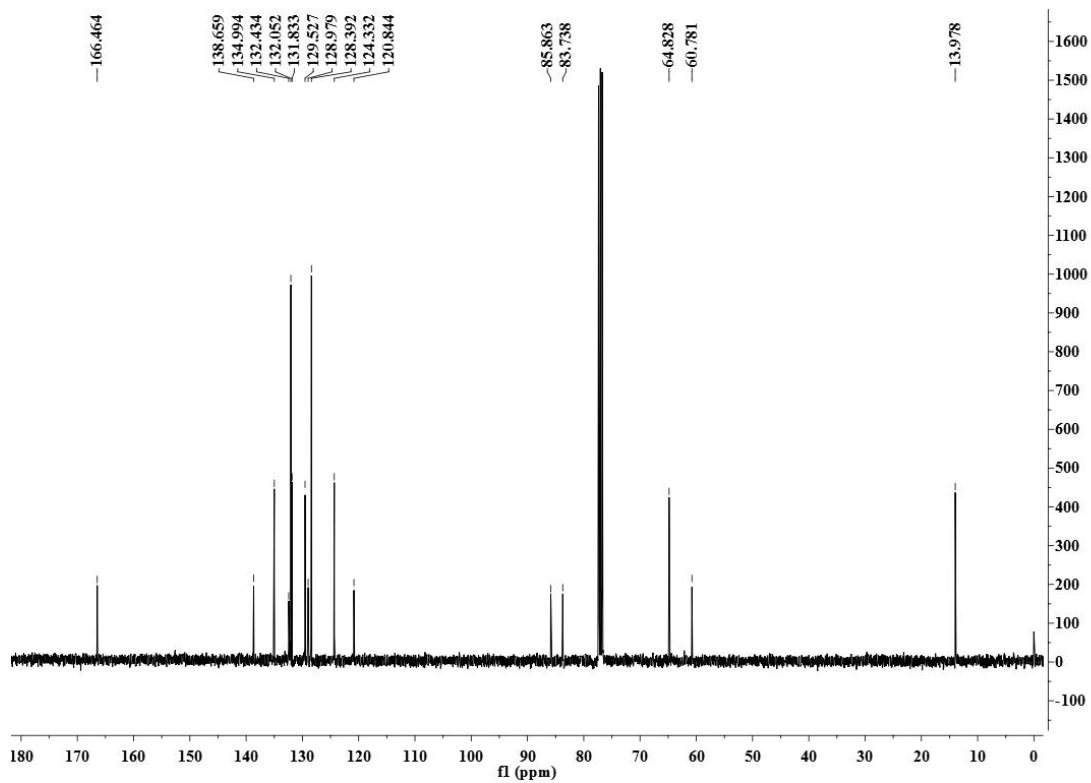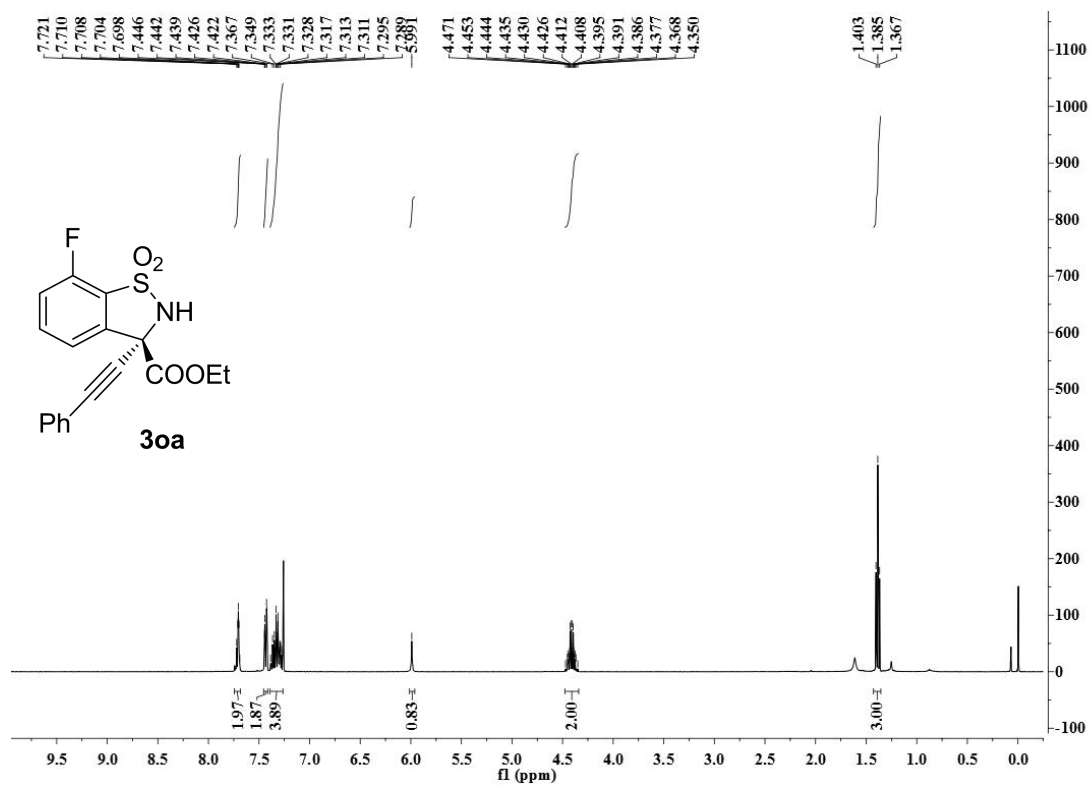

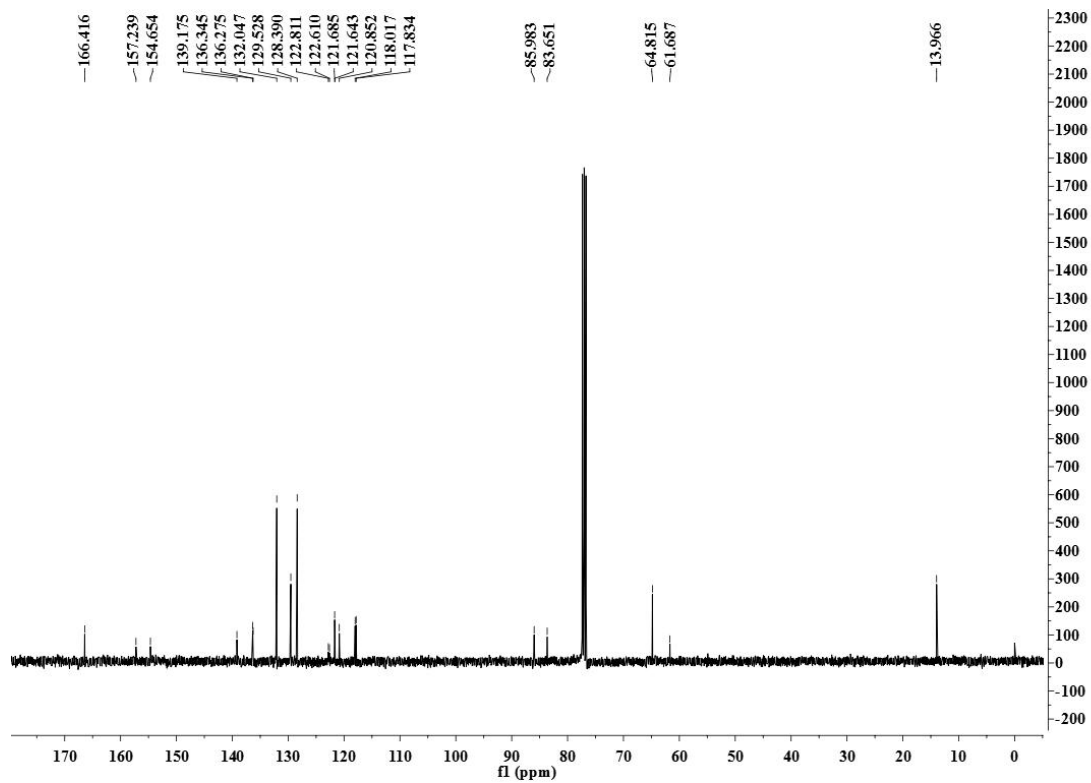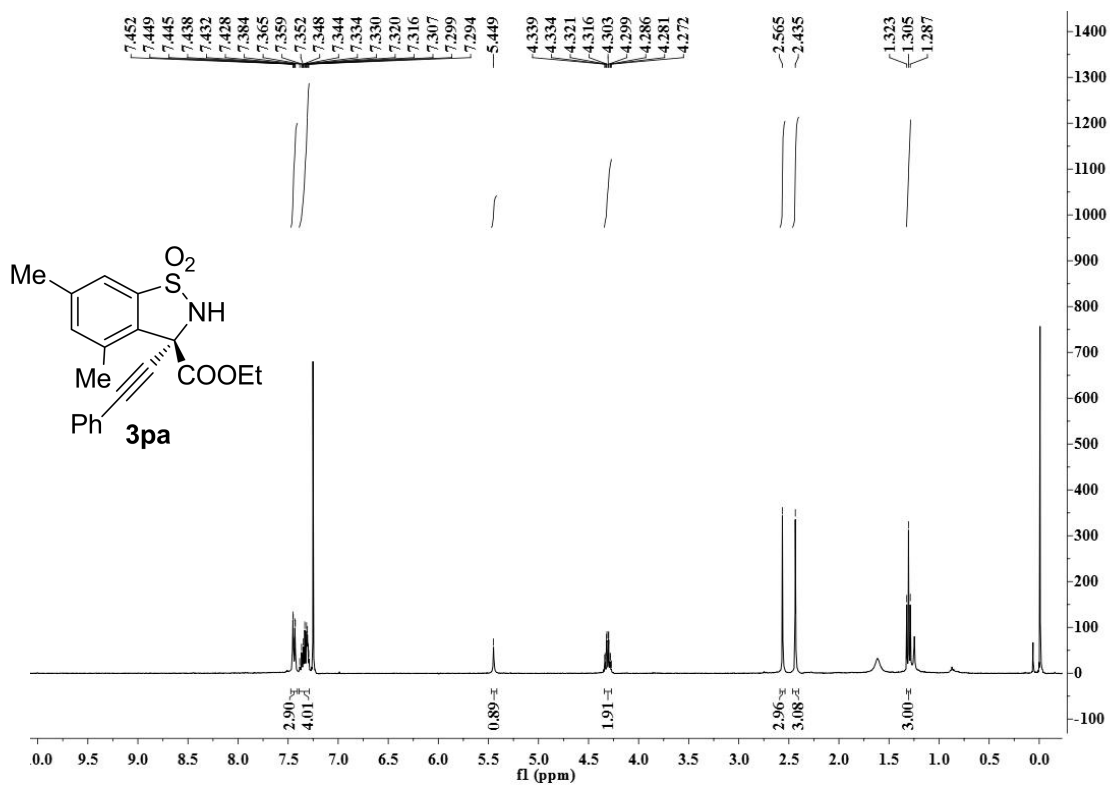

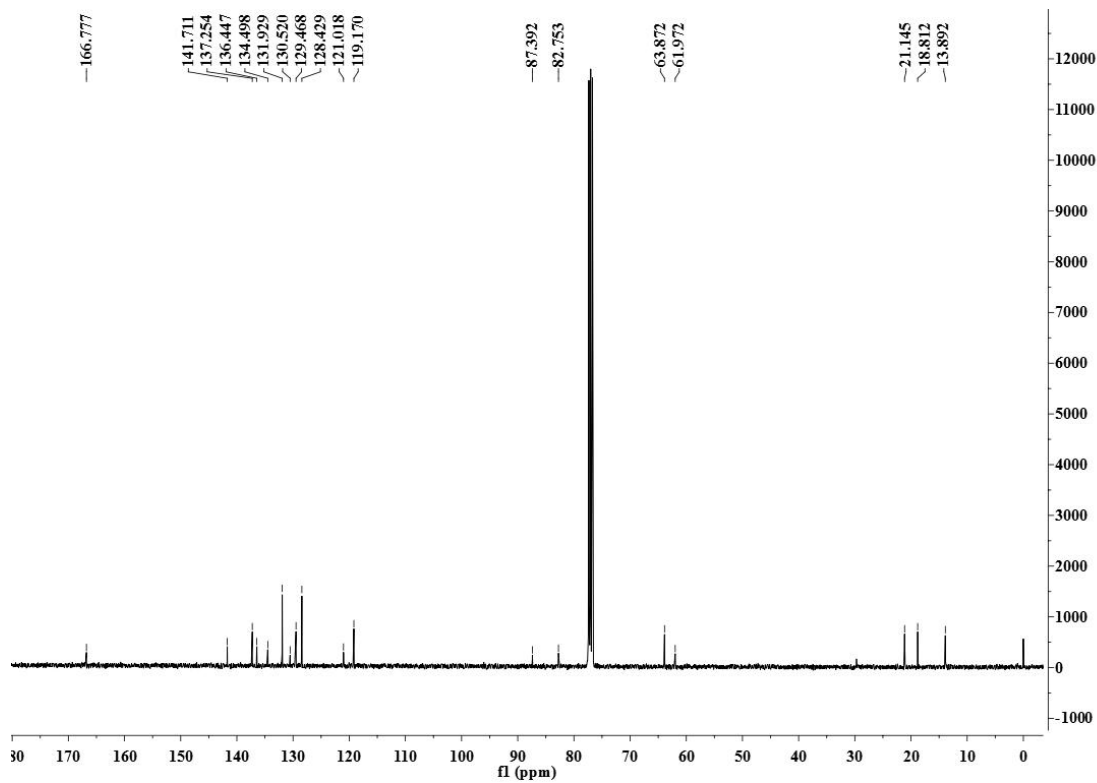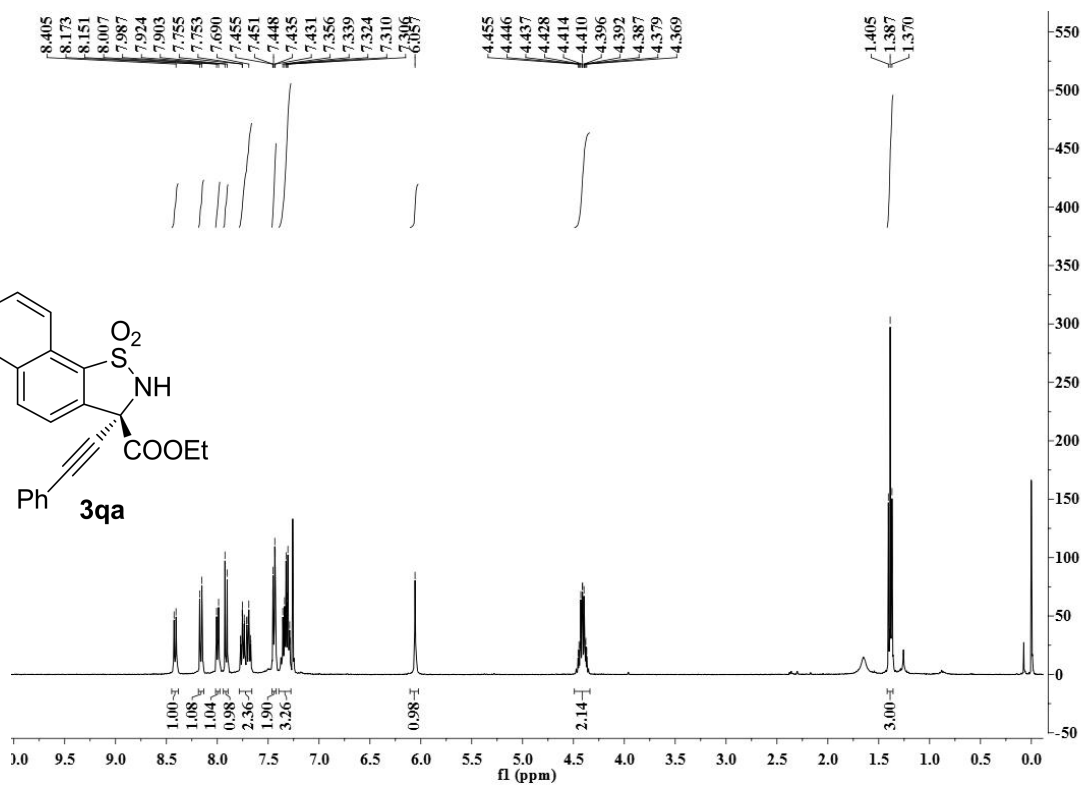

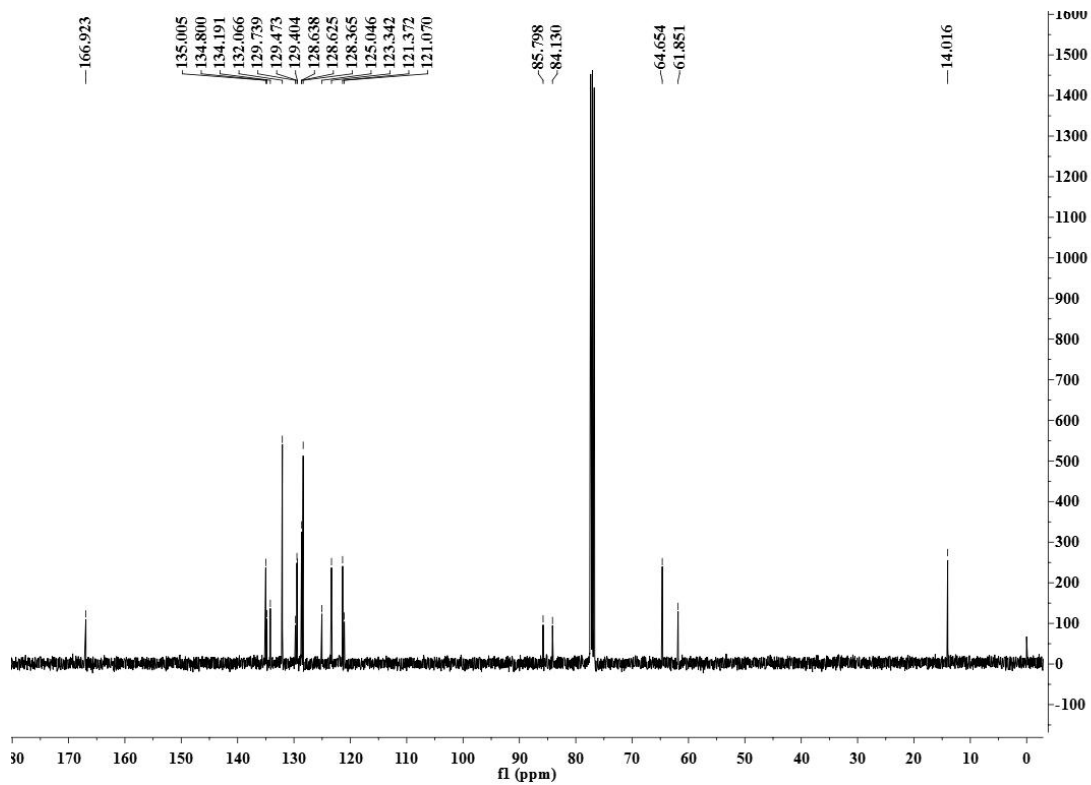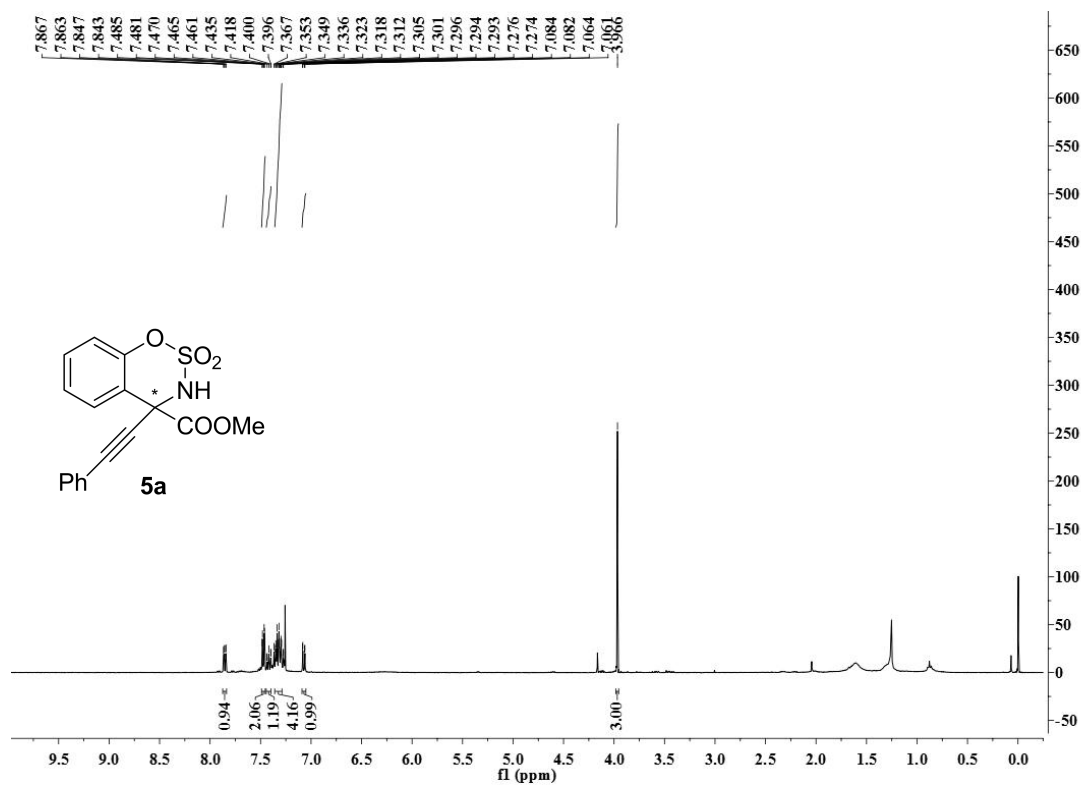

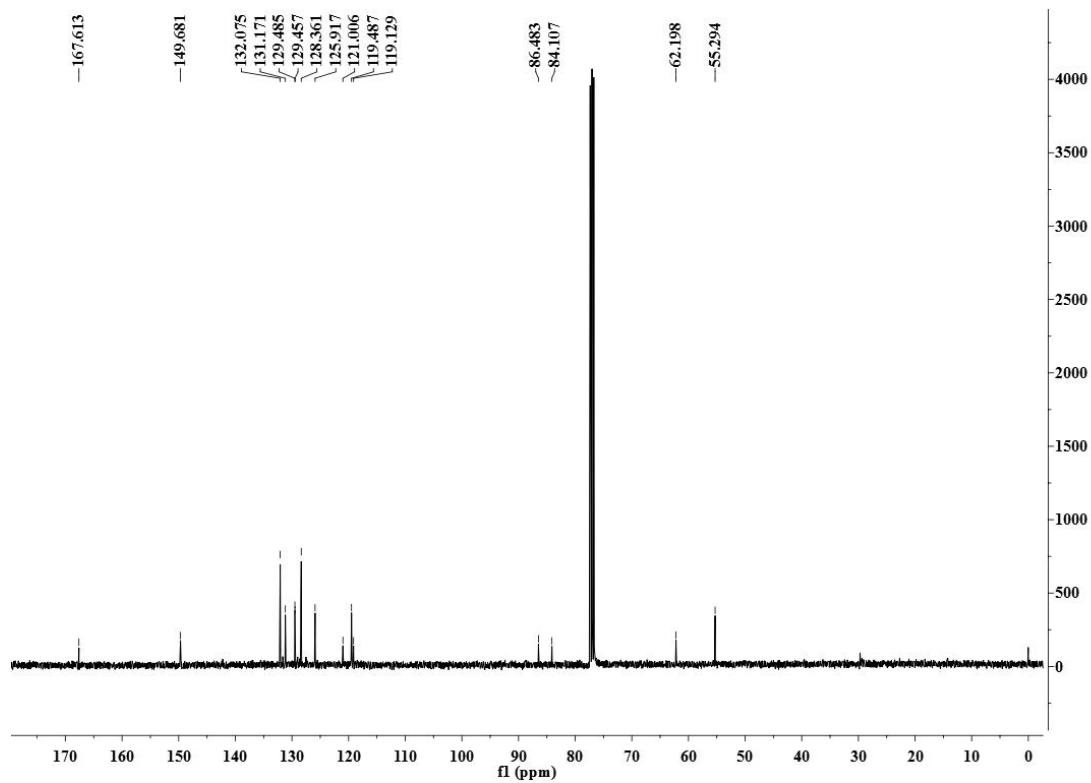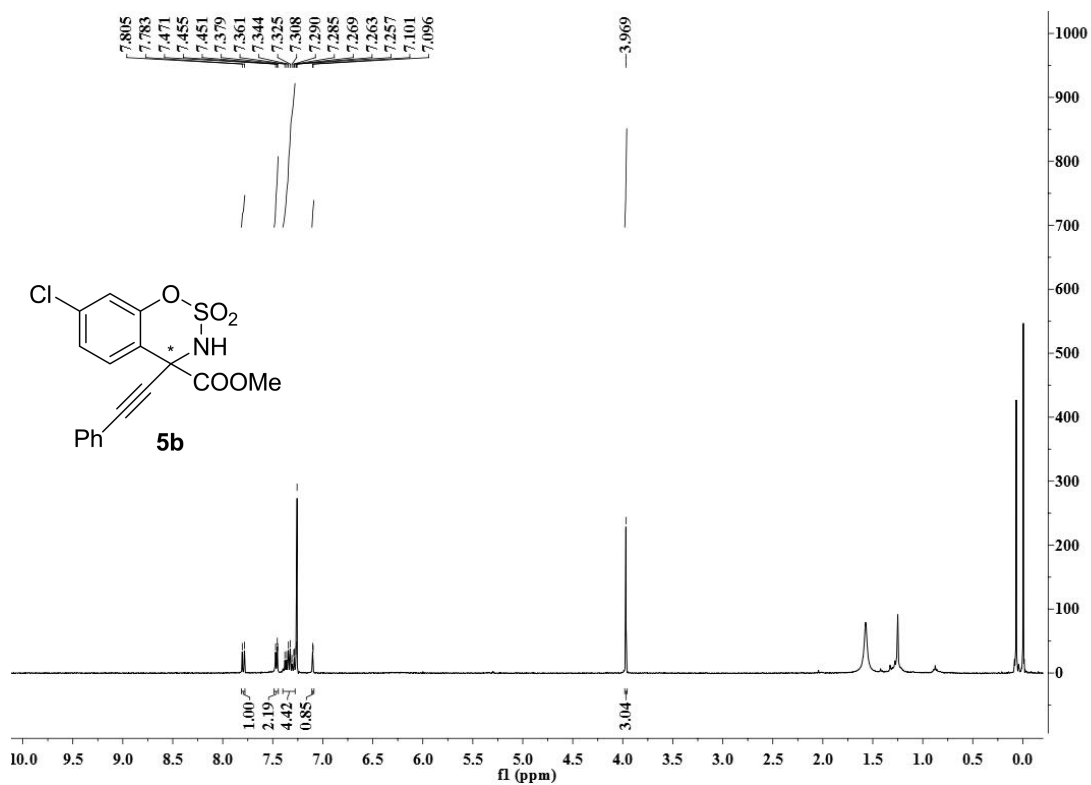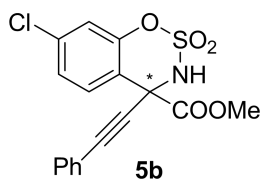

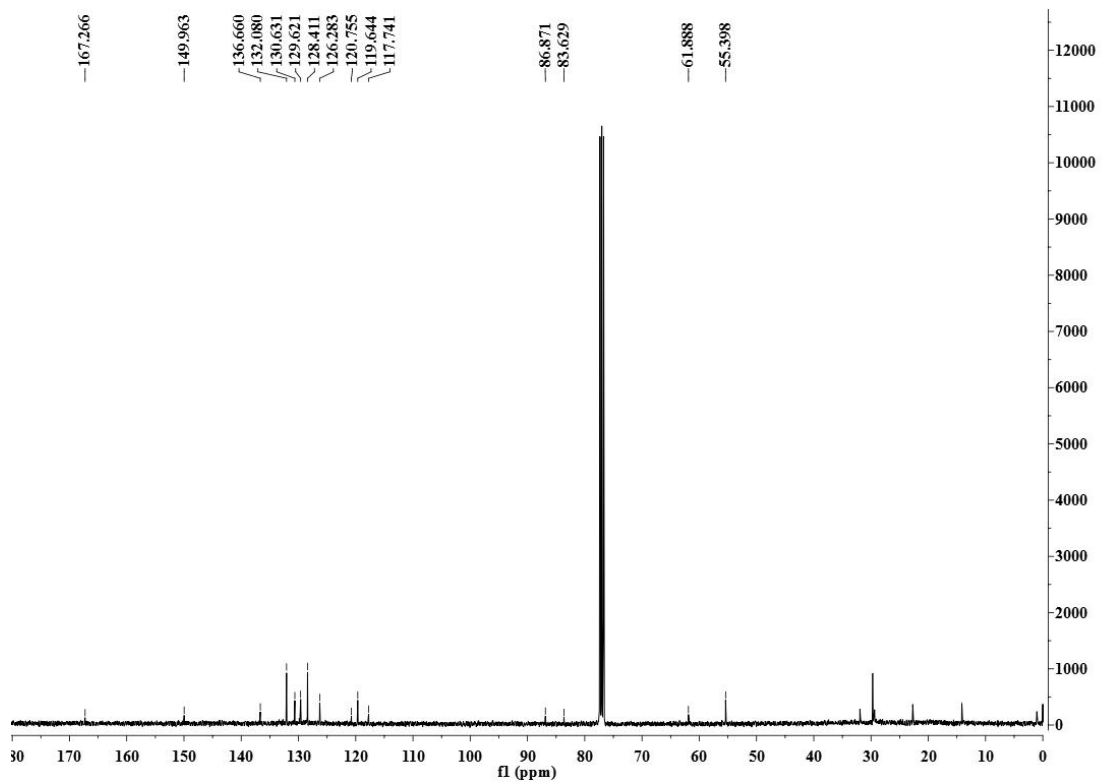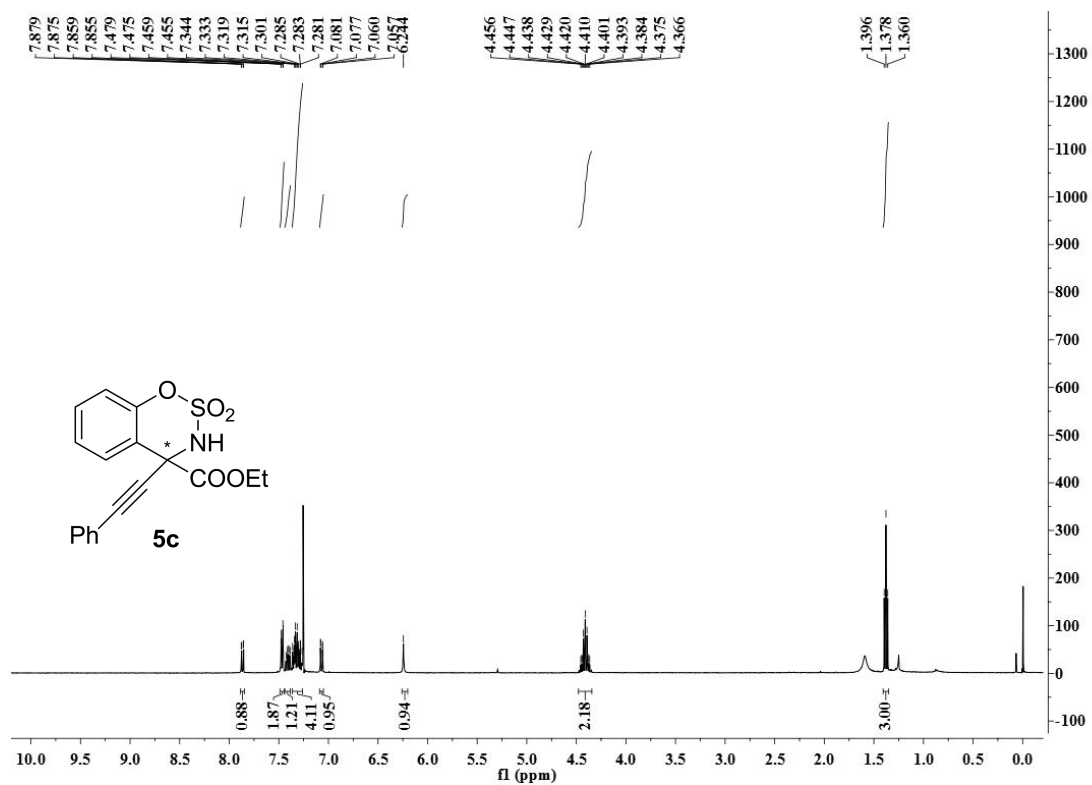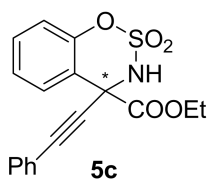

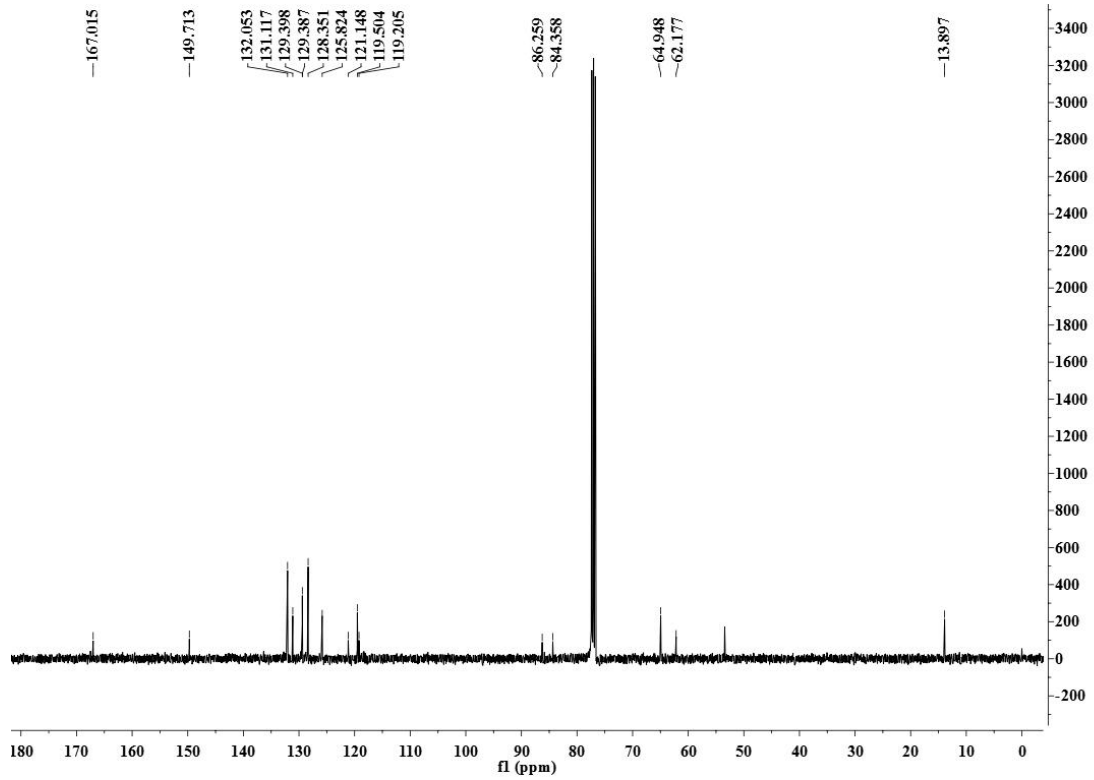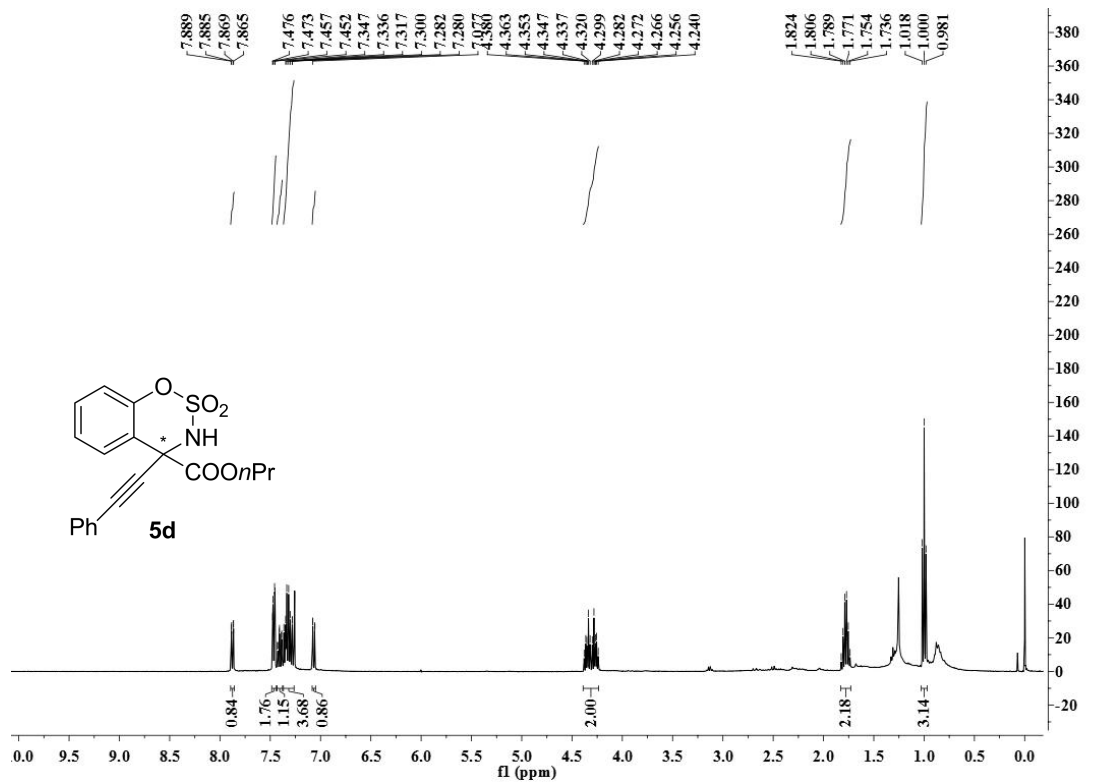



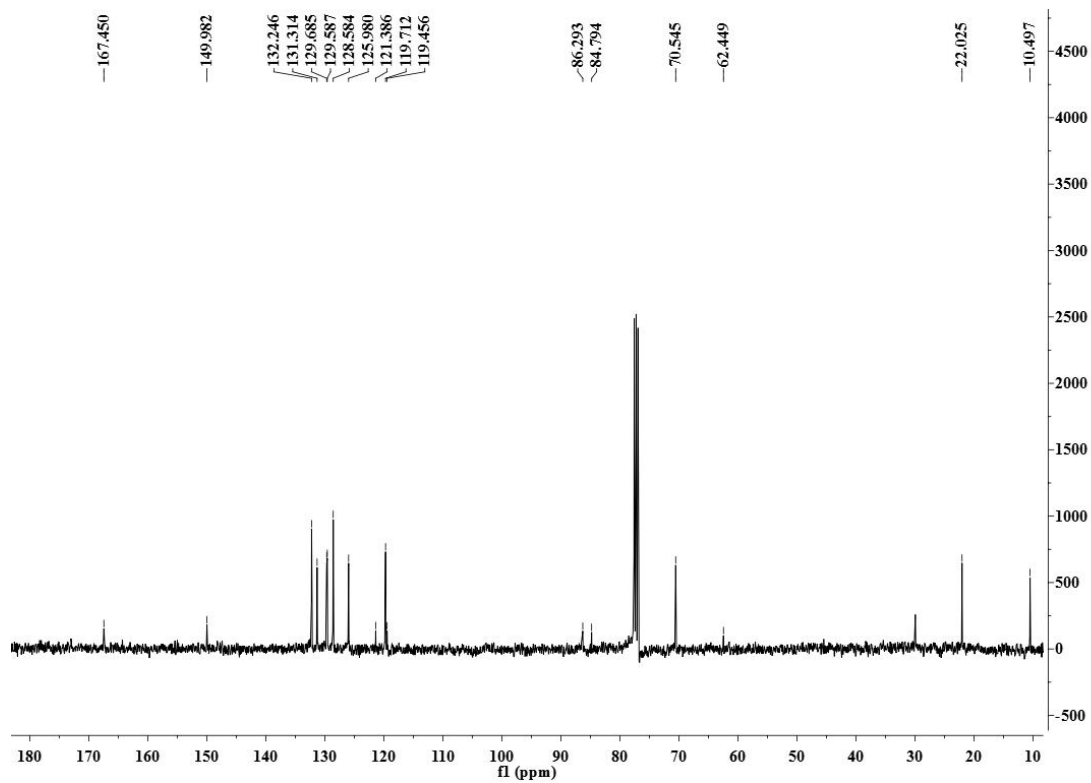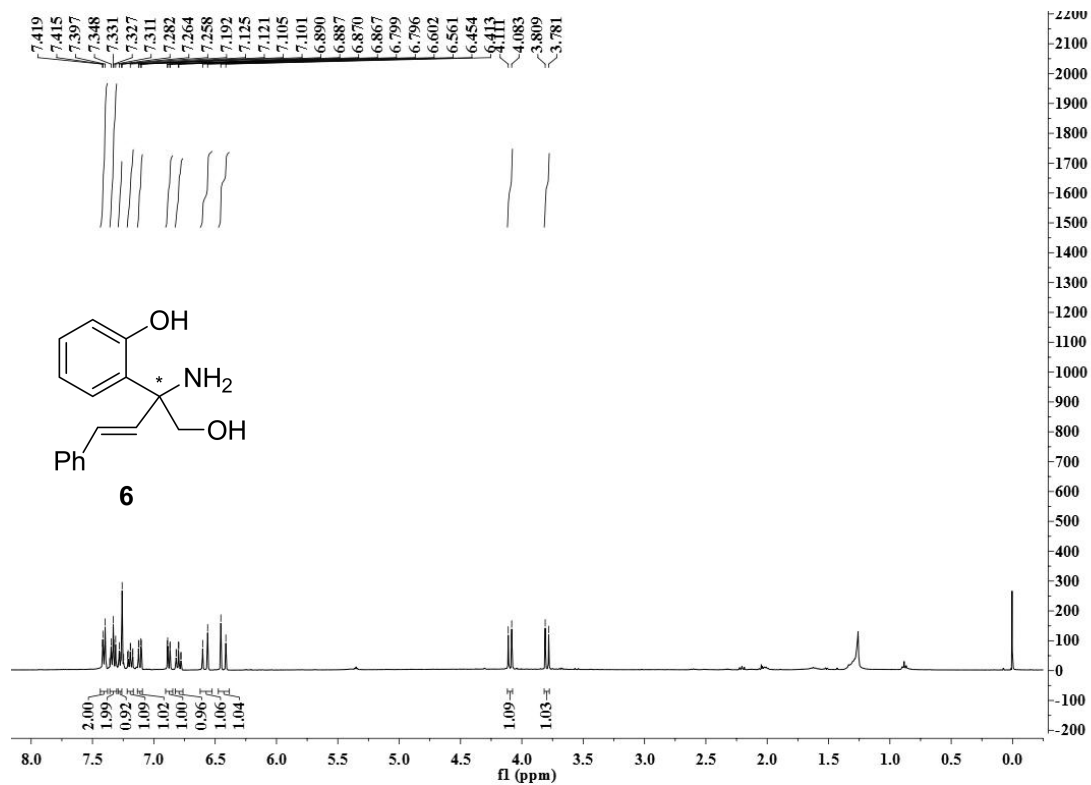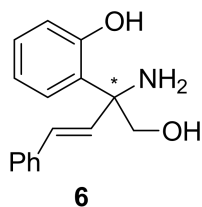

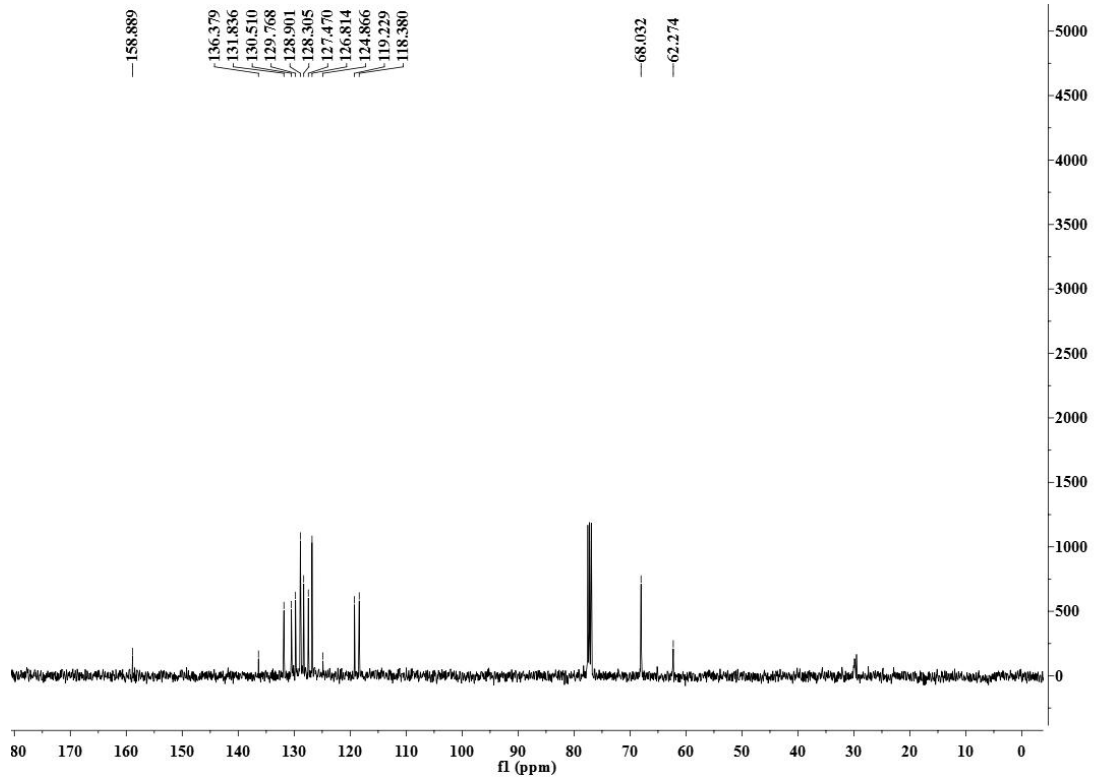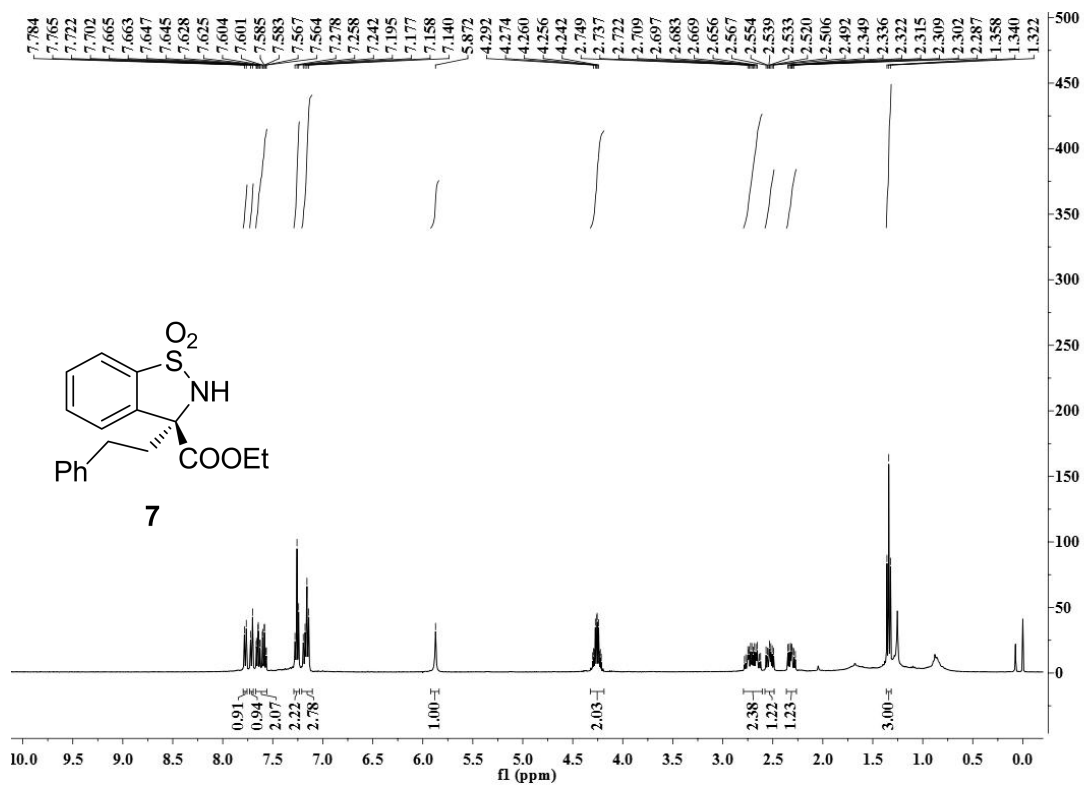

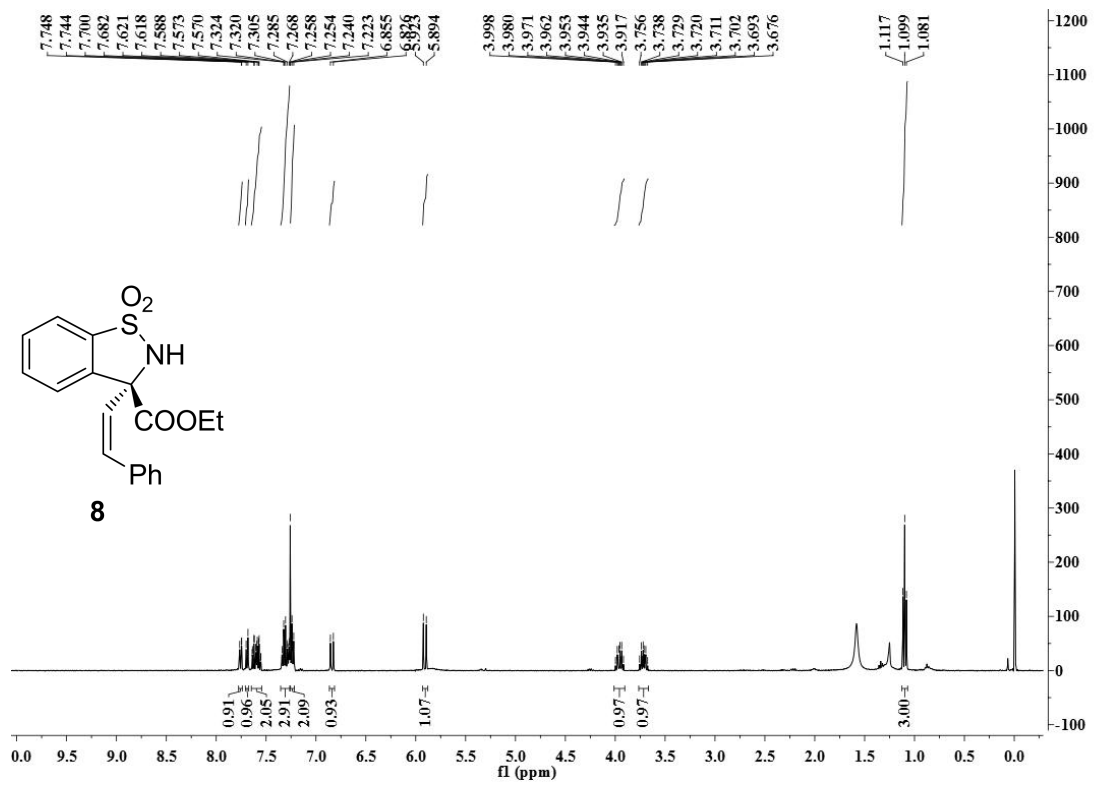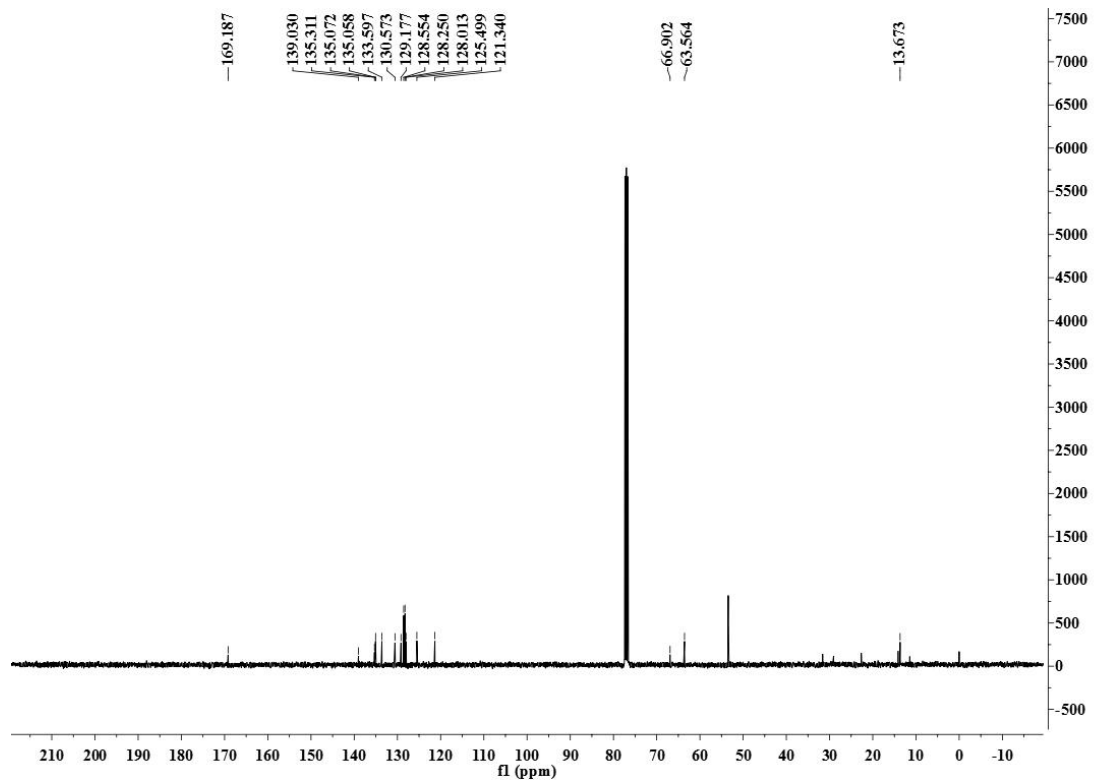

Supplement: c7cc02159c1.pdf [file c7cc02159c1.pdf]
